# Supplementary material
Source: PubMed Central journal article supplement (PMC3263526)

# Synthesis of Biphenyl Proteomimetics as Estrogen Receptor-alpha Coactivator Binding Inhibitors

## Supporting Information

Anna B. Williams,<sup>†</sup> Patrick T. Weiser,<sup>†</sup> Robert N. Hanson,<sup>\*†</sup> Jillian R. Gunther,<sup>‡</sup> John A. Katzenellenbogen<sup>‡</sup>

<sup>†</sup> *Department of Chemistry and Chemical Biology, Northeastern University, 360 Huntington Avenue, Boston, MA 02115*

<sup>‡</sup> *Department of Chemistry, University of Illinois at Urbana-Champaign, 600 South Mathews Avenue, Urbana, Illinois 61801*

\* *r.hanson@neu.edu*

## Table of Contents

|                                                                  |            |
|------------------------------------------------------------------|------------|
| <b>General</b> .....                                             | <b>S2</b>  |
| <b>Experimental Methods</b> .....                                | <b>S2</b>  |
| Synthesis of para-brominated 2-alkylphenols.....                 | S2         |
| Synthesis of para-hydroxyphenylboronate esters .....             | S3         |
| Synthesis of ethyl 4-bromophenoxyacetates.....                   | S4         |
| Synthesis of biphenyl phenols. ....                              | S5         |
| Synthesis of the dimethylaminoethoxy ethyl ester .....           | S6         |
| Synthesis of the carboxylic acid and the hydrochloride salt..... | S8         |
| Synthesis of compound 1a. ....                                   | S10        |
| <b>Biological Methods</b> .....                                  | <b>S11</b> |
| TR-FRET CBI Assay .....                                          | S11        |
| Radiometric Binding Assay .....                                  | S12        |
| Luciferase Reporter Gene Assay .....                             | S12        |
| <b>NMR Data</b> .....                                            | <b>S14</b> |
| <b>MS Data</b> .....                                             | <b>S42</b> |

## General

All commercially available reagents were purchased from Sigma-Aldrich and used without further purification. Solvents were distilled and reactions requiring inert conditions were performed under N<sub>2</sub> or argon. Column chromatography was performed using silica gel unless otherwise indicated. Flash chromatography was performed using the Argonaut FlashMaster Solo with an FC204 fraction collector. Thin layer chromatography was used to monitor reactions using Selecto Scientific 200 micron silica gel flexible TLC plates. <sup>1</sup>H was recorded on a Varian Unity-INOVA 500MHz spectrometer. <sup>13</sup>C NMR were recorded on a Varian 300MHz spectrometer. High resolution mass spectral data were obtained at the University of Massachusetts Mass Spectrometry Facility which is supported, in part, by the National Science Foundation.

## Experimental Methods

*Representative procedure for the synthesis of para-brominated 2-alkylphenols.*

### Preparation of 2-Benzyl-4-bromophenol (3e)

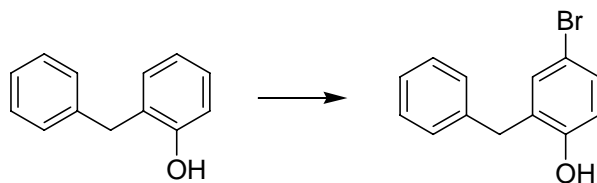

2-benzylphenol (4.61 g, 25 mmol) was dissolved in chloroform (200 mL). Tetra-*n*-butyl ammonium tribromide (14.47 g, 30 mmol) was added and the solution was stirred for 3 hours at room temperature. The solvent was removed by rotary evaporation and the crude product was partitioned between ether and water. The ether layer was washed sequentially with 1 N HCl (x2) and brine (x2). The organic layer was separated and dried over magnesium sulfate. Solvent was evaporated and the crude product was purified by chromatography on silica gel (Hexane/EtOAc, 80:20). The desired product (6.2 g, 95%) was isolated as a clear yellow oil. <sup>1</sup>H NMR (500 MHz, CDCl<sub>3</sub>): δ = 7.30 (t, *J* = 7.5 Hz, 2H), 7.25-7.20 (m, 5H), 6.66 (d, *J* = 7.0 Hz, 1H), 3.94 (s, 2H) ppm.

### 2-Isopropyl-4-bromophenol (3b)

Same procedure as **3e**. Product isolated in 88% yield as a yellow oil. <sup>1</sup>H NMR (500 MHz, CDCl<sub>3</sub>): δ = 7.35 (d, *J* = 2.5 Hz, 1H), 7.19 (dd, *J* = 8.5, 2.5 Hz, 1H), 6.67 (d, *J* = 9 Hz, 1H), 3.32 (m, *J* = 7.0 Hz, 1H), 1.27 (d, *J* = 8.0 Hz, 6H) ppm

### 2-sec-Butyl-4-bromophenol (3c)

Same procedure as **3e**. Product isolated in essentially quantitative yield as a yellow oil.

<sup>1</sup>H NMR (500 MHz, CDCl<sub>3</sub>-d): δ 7.24 (d, *J* = 2.5 Hz, 1 H), 7.16 (dd, *J* = 8 Hz, 2.5 Hz, 1H), 6.65 (d, *J* = 8 Hz, 1H), 4.82 (br s, 1H), 2.93 (m, 1H), 1.62 (m, 2H), 1.22 (d, *J* = 6.5 Hz, 3H), 0.877 (t, *J* = 7 Hz, 3H) ppm.

### 2-tert-Butyl-4-bromophenol (3d)

Same procedure as **3e**. Product isolated in essentially quantitative yield as a yellow oil.

<sup>1</sup>H NMR (500 MHz, CDCl<sub>3</sub>-d): δ 7.36 (d, *J* = 2.5 Hz, 1H), 7.17 (dd, *J* = 8.5 Hz, 2.5 Hz, 1H), 6.57 (d, *J* = 8 Hz, 1H), 5.01 (br s, 1H), 1.40 (s, 9H) ppm.

*Representative procedure for the synthesis of para-hydroxyphenylboronate esters*

### Preparation of 2-Benzyl-4-(4,4,5,5-tetramethyl-1,3,2-dioxaborolan-2-yl)phenol (4e)

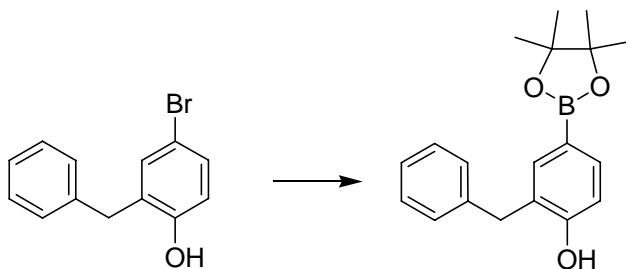

**3e** (0.79 g, 3.0 mmol), PdCl<sub>2</sub>(dppf) (0.15 g, 6 mol %), and potassium acetate (0.59 g, 6.0 mmol) were added to the reaction vessel which was predried under vacuum and flushed with argon. Anhydrous dioxane (20 ml) was added via syringe. The reaction mixture was heated to 80 °C and stirred for 30 minutes. Bis(pinacolato)diboron (0.84 g, 3.3 mmol), dissolved in 5 mL dioxane, was added and the reaction was kept under inert atmosphere, stirred, and heated at 80 °C overnight. The crude mixture was filtered through activated carbon and Celite, and solvent was removed by rotary evaporation. The crude mixture was dissolved in ethyl acetate, washed with water (x2), brine (x2) and dried over magnesium sulfate. The product was purified by flash chromatography using silica gel (Hexane/EtOAc, 80:20) to afford 0.60 g (65 %) of the desired product as a white solid (m.p. 119-121°C). <sup>1</sup>H NMR (500 MHz, CDCl<sub>3</sub>): δ = 7.70 (s, 1H), 7.65 (dd, *J* = 7.0, 1.5 Hz, 1H), 7.30 (t, *J* = 7.0 Hz, 2H), 7.25 (d, *J* = 8.0 Hz, 2H), 7.22 (t, *J* = 7.5 Hz, 1H), 6.81 (d, *J* = 7.0 Hz, 1H), 4.04 (s, 2H), 1.37 (s, 12H) ppm.

### 2-Isopropyl-4-(4,4,5,5-tetramethyl-1,3,2-dioxaborolan-2-yl)phenol (4b)

Same procedure as **4e**. Product isolated in 95% yield as a white solid (m.p. 148-150 °C).

<sup>1</sup>H NMR (500 MHz, CDCl<sub>3</sub>): δ = 7.68 (s, 1H), 7.57 (dd, *J* = 8.0, 1.5 Hz, 1H), 6.76 (d, *J* = 8.0 Hz, 1H), 3.23 (m, *J* = 7.0 Hz, 1H), 1.37 (s, 12 H), 1.30 (d, *J* = 6.5 Hz, 6H) ppm.

### 2-sec-Butyl-4-(4,4,5,5-tetramethyl-1,3,2-dioxaborolan-2-yl)phenol (4c)

Same procedure as **4e**. Product isolated in 58% yield as a white solid (m.p. 114-117 °C). <sup>1</sup>H NMR (500 MHz, CDCl<sub>3</sub>-d): δ 7.61 (d, *J* = 1.5 Hz, 1H), 7.55 (dd, *J* = 7.5 Hz, 1.5 Hz, 1H), 6.74 (d, *J* = 7.5 Hz, 1H), 4.93 (br s, 1H), 2.95 (m, 1H), 1.67 (m, 2H), 1.34 (s, 12H), 1.27 (d, *J* = 6.5 Hz, 3H), 0.88 (t, *J* = 7 Hz, 3H) ppm.

### 2-tert-Butyl-4-(4,4,5,5-tetramethyl-1,3,2-dioxaborolan-2-yl)phenol (4d)

Same procedure as **4e**. Product isolated in 61% yield as a white solid (m.p. 170-173 °C). <sup>1</sup>H NMR (500 MHz, CDCl<sub>3</sub>-d): δ 7.72 (d, *J* = 1.5 Hz, 1H), 7.55 (dd, *J* = 7.5 Hz, 1.5 Hz, 1H), 6.66 (d, *J* = 8 Hz, 1H), 4.96 (br s, 1H), 1.43 (s, 9H), 1.33 (s, 12H) ppm.

*Representative procedure for the synthesis of ethyl 4-bromophenoxyacetates*

### Preparation of Ethyl 2-(2-benzyl-4-bromophenoxy)acetate (5e)

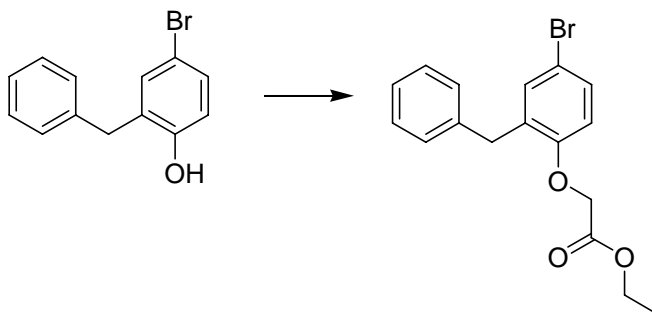

**3e** (2.10 g, 8 mmol) was dissolved in dry THF (75 mL). Sodium hydride (60 % in oil, 0.45 g, 11.2 mmol) was added and the solution was stirred at room temperature for 30 minutes. Ethyl bromoacetate (1.87 g, 11.2 mmol) was then added slowly and the solution was stirred for 2 hours at room temperature. The reaction mixture (milky-white suspension) was quenched with ethanol and concentrated. The concentrate was partitioned between ethyl acetate and water (x2). The combined organic layers were washed with brine (x2), dried, and concentrated. The mixture was purified by flash chromatography on silica gel (Hexane/EtOAc, 90:10) to afford 2.57 g (92%) of the desired product as a crystalline solid (m.p. 67-70 °C). <sup>1</sup>H NMR (500 MHz, CDCl<sub>3</sub>): δ = 7.34-7.22 (m, 7H), 6.65 (d, *J* = 8.5 Hz, 1H), 4.62 (s, 2H), 4.30 (q, *J* = 6.5 Hz, 2H), 4.05 (s, 2H), 1.32 (t, *J* = 7.5 Hz, 3H) ppm.

### Ethyl 2-(2-isopropyl-4-bromophenoxy)acetate (5b)

Same procedure as **5e**. Product was isolated in 78% yield as a yellow oil. <sup>1</sup>H NMR (500 MHz, CDCl<sub>3</sub>): δ = 7.35 (d, *J* = 2.5 Hz, 1H), 7.24 (dd, *J* = 8.5, 2.5 Hz, 1H), 6.61 (d, *J* = 8.5 Hz, 1H), 4.64 (s, 2H), 4.28 (q, *J* = 7.5 Hz, 2H), 3.41 (m, *J* = 7.0 Hz, 1H), 1.31 (t, *J* = 7.5 Hz, 3H), 1.26 (d, *J* = 6.5 Hz, 6H) ppm.

### Ethyl 2-(2-sec-butyl-4-bromophenoxy)acetate (**5c**)

Same procedure as **5e**. Product was isolated in 92% yield as a pale yellow oil.  $^1\text{H}$  NMR (500 MHz,  $\text{CDCl}_3$ -d):  $\delta$  7.28 (d,  $J = 2.5$  Hz, 1H), 7.22 (dd,  $J = 9$  Hz, 2.5 Hz, 1H), 6.60 (d,  $J = 9$  Hz, 1H), 4.60 (s, 2H), 4.26 (q,  $J = 7$  Hz, 2H), 3.16 (m, 1H), 1.60 (m, 2H), 1.29 (t,  $J = 7.5$  Hz, 3H), 1.21 (d,  $J = 7$  Hz, 3H), 0.86 (t,  $J = 7.5$  Hz, 3H) ppm.

### Ethyl 2-(2-tert-butyl-4-bromophenoxy)acetate (**5d**)

Same procedure as **5e**. Product was isolated in 82% yield as a pale yellow oil.  $^1\text{H}$  NMR (500 MHz,  $\text{CDCl}_3$ -d):  $\delta$  7.41 (d,  $J = 2.5$  Hz, 1H), 7.27 (dd,  $J = 9$  Hz, 2.5 Hz, 1H), 6.62 (d,  $J = 8$  Hz, 1H), 4.63 (s, 2H), 4.29 (q,  $J = 7$  Hz, 2H), 1.42 (s, 9H), 1.32 (t,  $J = 7$  Hz, 3H) ppm.

*Representative procedure for the synthesis of biphenyl phenols.*

### Preparation of Ethyl 2-(1,1'-biphenyl-3,3'-dibenzyl-4'-ol-4-oxy) acetate (**6e**)

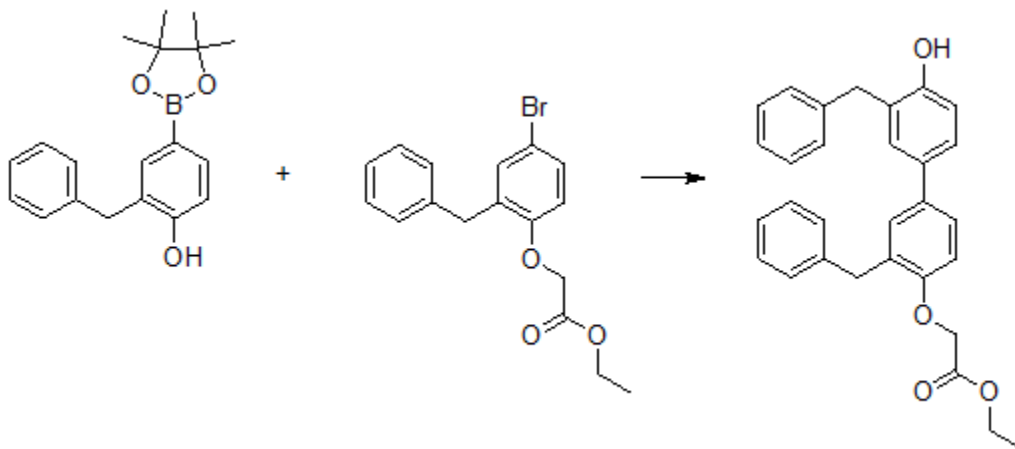

**5e** (0.210 g, 0.60 mmol),  $\text{PdCl}_2(\text{PPh}_3)_2$  (0.026 g, 6 mol %),  $\text{PPh}_3$  (0.010 g, 6 mol %), and 2M aqueous sodium carbonate (0.8 mL, 1.2 mmol) were added to the reaction vessel which was vacuumed and flushed with argon. Tetrahydrofuran and water (7 mL : 2 mL) were degassed with argon and added via syringe. The reaction was heated to reflux and stirred for 30 minutes. **4e** (0.224 g, 0.72 mmol), dissolved in 3 mL tetrahydrofuran, was then added and the reaction was stirred at reflux, overnight, under an inert atmosphere. Activated carbon was added to the crude solution and the resultant mixture was filtered through Celite and solvent was evaporated to dryness. The concentrate was dissolved in ethyl acetate, washed with water (x2) and brine (x2), dried over magnesium sulfate, and concentrated. The mixture was purified by flash chromatography on silica gel (Hexane/EtOAc, 80:20) to afford 0.165 g (61%) of the desired product as a white solid (m.p. 142-144 °C).  $^1\text{H}$  NMR (500 MHz,  $\text{CDCl}_3$ ):  $\delta$  =

7.34-7.27 (m, 12H), 7.24 (t,  $J = 7.5$  Hz, 1H) 7.20 (t,  $J = 6.5$  Hz, 1H), 6.83 (d,  $J = 7.0$  Hz, 1H), 6.81 (d,  $J = 8.5$  Hz, 1H), 4.64 (s, 2H), 4.30 (q,  $J = 7.0$  Hz, 2H), 4.11 (s, 2H), 4.05 (s, 2H), 1.33 (t,  $J = 7.5$  Hz, 3H) ppm.

**Ethyl 2-(1,1'-biphenyl-3,3'-diisopropyl-4'-ol-4-oxy) acetate (6b)**

Same procedure as **6e**. Product was isolated in 49% yield as a white solid (m.p. 111-113 °C).  $^1\text{H}$  NMR (500 MHz,  $\text{CDCl}_3$ ):  $\delta = 7.40$  (d,  $J = 2$  Hz, 1H), 7.36 (d,  $J = 2.5$  Hz, 1H), 7.29 (dd,  $J = 8.0, 2.5$  Hz, 1H), 7.25 (dd,  $J = 7.8, 2.3$  Hz, 1H), 6.80 (d,  $J = 6.5$  Hz, 1H), 6.77 (d,  $J = 7.0$  Hz, 1H), 4.68 (s, 2H), 4.29 (q,  $J = 7.0$  Hz, 2H), 3.46 (7let,  $J = 7.0$  Hz, 1H), 3.26 (7let,  $J = 7.2$  Hz, 1H), 1.32 (d,  $J = 6.5$  Hz, 6H), 1.32 (t,  $J = 7.0$  Hz, 3H), 1.30 (d,  $J = 8$  Hz, 6H) ppm

**Ethyl 2-(1,1'-biphenyl-3,3'-disec-butyl-4'-ol-4-oxy) acetate (6c)**

Same procedure as **6e**. Product was isolated in 27% yield as a white solid (m.p. 119-121 °C).  $^1\text{H}$  NMR (500 MHz,  $\text{CDCl}_3$ -d):  $\delta$  7.36 (d,  $J = 2$  Hz, 1H), 7.32 (d,  $J = 2$  Hz, 1H), 7.30 (dd,  $J = 8.5$  Hz, 2.5 Hz, 1H), 6.82 (d,  $J = 7.5$  Hz, 1H), 6.78 (d,  $J = 8$  Hz, 1H), 4.73 (s, 1H), 4.67 (s, 2H), 4.29 (q,  $J = 7$  Hz, 2H), 3.23 (m, 1H), 3.01 (m, 1H), 1.73 (m, 2H), 1.65 (m, 2H), 1.31 (m, 9H), 0.93 (t,  $J = 7.5$  Hz, 3H), 0.91 (t,  $J = 7.5$  Hz, 3H) ppm.

**Ethyl 2-(1,1'-biphenyl-3,3'-ditert-butyl-4'-ol-4-oxy) acetate (6d)**

Same procedure as **6e**. Product was isolated in 32% yield as a white solid (m.p. 174-177 °C).  $^1\text{H}$  NMR (500 MHz,  $\text{CDCl}_3$ -d):  $\delta$  7.48 (d,  $J = 2.5$  Hz, 1H), 7.44 (d,  $J = 2.5$  Hz, 1H), 7.32 (dd,  $J = 2$  Hz, 8.5 Hz, 1 H), 7.25 (dd,  $J = 2$  Hz, 8.5 Hz, 1H), 6.78 (d,  $J = 8$  Hz, 1H), 6.73 (d,  $J = 7.5$ , 1H), 4.68 (s, 2H), 4.30 (q,  $J = 7$  Hz, 2H), 1.48 (s, 9H), 1.46 (s, 9H), 1.33 (t,  $J = 7.5$  Hz, 3H) ppm.

*Representative procedure for the synthesis of the dimethylaminoethoxy ethyl ester*

**Preparation of Ethyl 2-(1,1'-biphenyl-3,3'-dibenzyl-4'-[2-(dimethylamino) ethoxy]-4-oxy) acetate (7e)**

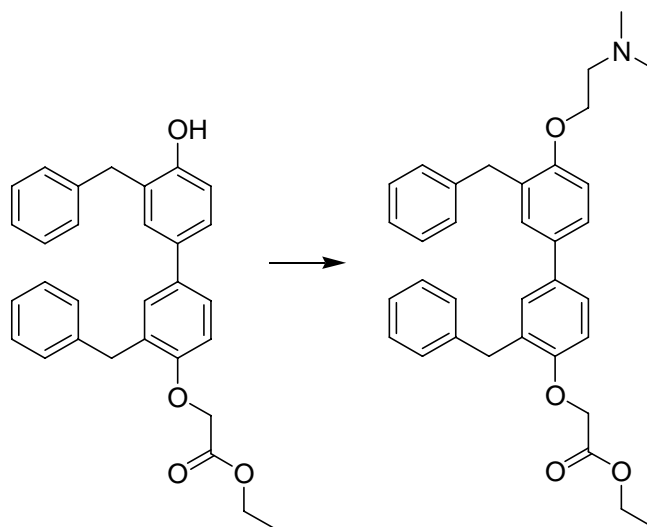

A mixture containing **6e** (81 mg, 0.18 mmol), 2-(dimethylamino)ethyl chloride hydrochloride (83 mg, 0.57 mmol), and potassium carbonate (132 mg, 0.95 mmol) in acetone (15 mL) was heated at reflux overnight. The reaction was monitored by thin layer chromatography using C18 plates. The reaction mixture was concentrated under reduced pressure. The resultant solid was then partitioned between ethyl acetate and water. The organic layer was washed with brine, dried over magnesium sulfate, filtered and concentrated under reduced pressure. The crude product was purified by flash column chromatography on C18 gel (Hexane/EtOAc) to yield 55 mg (60%) of the desired product as a colorless oil.  $^1\text{H}$  NMR (500 MHz,  $\text{CDCl}_3$ ):  $\delta$  = 7.31-7.16 (m, 14H), 6.87 (d,  $J$  = 9 Hz, 1H), 6.76 (d,  $J$  = 8.5 Hz, 1H), 4.61 (s, 2H), 4.26 (q,  $J$  = 7.5 Hz, 2H), 4.10 (t,  $J$  = 5.8 Hz, 2H), 4.08 (s, 2H), 4.00 (s, 2H), 2.76 (t,  $J$  = 5.5 Hz, 2H), 2.34 (s, 6H), 1.30 (t,  $J$  = 7.3 Hz, 3H) ppm;  $^{13}\text{C}$  NMR (75.5 MHz,  $\text{CDCl}_3$ ):  $\delta$  = 169.2, 155.9, 155.1, 141.2, 141.0, 134.6, 133.6, 130.8, 130.1, 129.6, 129.4, 129.3, 129.2, 129.0, 128.8, 128.7, 128.3, 126.3, 126.0, 125.8, 125.6, 112.2, 112.1, 111.9, 111.7, 66.5, 66.1, 61.5, 58.3, 46.0, 45.7, 36.9, 36.4, 14.1 ppm.

**Ethyl 2-(1,1'-biphenyl-3,3'-diisopropyl-4'-[2-(dimethylamino) ethoxy]-4-oxy) acetate (7b)**

Same procedure as **7e**. Product was isolated in 51% yield as a colorless oil.  $^1\text{H}$  NMR (500 MHz,  $\text{CDCl}_3$ ):  $\delta$  = 7.40 (d,  $J$  = 2.5 Hz, 1H), 7.37 (d,  $J$  = 3.0 Hz, 1H), 7.30 (dd,  $J$  = 8.5, 2.5 Hz, 1H), 7.29 (dd,  $J$  = 8.5, 2.5 Hz, 1H), 6.89 (d,  $J$  = 8.5 Hz, 1H), 6.76 (d,  $J$  = 8.5 Hz, 1H), 4.66 (s, 2H), 4.27 (q,  $J$  = 8.5 Hz, 2H), 4.13 (t,  $J$  = 5.8 Hz, 2H), 3.45 (7let,  $J$  = 7 Hz, 1H), 3.37 (7let,  $J$  = 7 Hz, 1H), 2.81 (t,  $J$  = 5.8 Hz, 2H), 2.38 (s, 6H), 1.30 (t,  $J$  = 7.5 Hz, 3H), 1.29 (d,  $J$  = 7 Hz, 6H), 1.26 (d,  $J$  = 7 Hz, 6H) ppm;  $^{13}\text{C}$  NMR (75.5 MHz,  $\text{CDCl}_3$ ):  $\delta$  = 169.4, 155.4, 154.5, 137.9, 137.5, 135.3, 134.1, 125.5, 125.1, 125.0, 111.8, 111.8, 67.1, 66.1, 61.5, 58.7, 46.3, 27.4, 27.2, 23.0, 22.9, 14.4 ppm.

**Ethyl 2-(1,1'-biphenyl-3,3'-disec-butyl-4'-[2-(dimethylamino) ethoxy]-4-oxy) acetate (7c)**

Same procedure as **7e**. Product was isolated in 50% yield as a colorless oil.  $^1\text{H}$  NMR (500 MHz,  $\text{CDCl}_3$ -d):  $\delta$  7.35 (d,  $J = 2$  Hz, 1H), 7.30 (m, 3H), 6.89 (d,  $J = 8.5$  Hz, 1H), 6.76 (d,  $J = 8$  Hz, 1H), 4.65 (s, 2H), 4.27 (q,  $J = 7.5$  Hz, 2H), 4.11 (t,  $J = 6$  Hz, 2H), 3.22 (m, 1H), 3.14 (m, 1H), 2.78 (t,  $J = 6$  Hz, 2H), 2.37 (s, 6H), 1.71 (m, 2H), 1.59 (m, 2H), 1.27 (m, 9H), 0.89 (t,  $J = 7.5$  Hz, 3 H), 0.88 (t,  $J = 7.5$  Hz, 3H) ppm;  $^{13}\text{C}$  NMR (75.5 MHz,  $\text{CDCl}_3$ -d):  $\delta$  169.42, 155.76, 154.80, 136.86, 136.53, 135.16, 133.96, 126.14, 125.74, 125.03, 124.95, 111.92, 111.85, 67.25, 66.13, 61.44, 58.68, 46.35, 34.28, 34.00, 30.18, 30.08, 20.67, 14.40, 12.54, 12.51 ppm.

**Ethyl 2-(1,1'-biphenyl-3,3'-ditert-butyl -4'-[2-(dimethylamino) ethoxy]-4-oxy) acetate (7d)**

Same procedure as **7e**. Product was isolated in 54% yield as a colorless oil.  $^1\text{H}$  NMR (500 MHz,  $\text{CDCl}_3$ -d):  $\delta$  7.48 (s, 1H), 7.45 (s, 1H), 7.33 (d, 1H), 7.31 (d, 1H), 6.93 (d,  $J = 8.5$  Hz, 1H), 6.77 (d,  $J = 8$  Hz, 1H), 4.67 (s, 2H), 4.29 (q,  $J = 7.5$  Hz, 2H), 4.15 (t,  $J = 6.5$ , 2H), 2.84 (t,  $J = 6$  Hz, 2H), 2.37 (s, 6H), 1.47 (s, 9H), 1.43 (s, 9H), 1.32 (t,  $J = 7$  Hz, 3H) ppm;  $^{13}\text{C}$  NMR (75.5 MHz,  $\text{CDCl}_3$ -d):  $\delta$  13.15, 28.75, 28.82, 33.92, 33.98, 45.11, 57.47, 60.24, 64.40, 65.62, 110.98, 111.45, 124.16, 124.27, 124.64, 124.95, 132.53, 133.59, 137.30, 137.64, 154.59, 155.78, 167.97 ppm.

*Representative procedure for the synthesis of the carboxylic acid and the hydrochloride salt.*

**Preparation of 2-(1,1'-Biphenyl-3,3'-dibenzyl-4'-[2-(dimethylamino) ethoxy]-4-oxy) acetic acid (1e)**

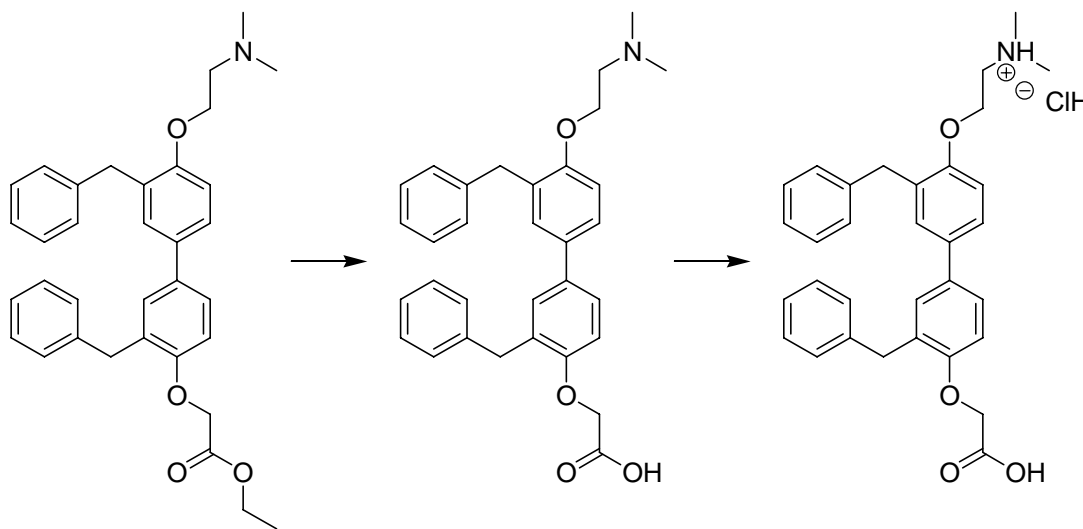

1 N aqueous sodium hydroxide (0.10 mL, 0.10 mmol) was added to a solution of **7e** (25 mg, 0.048 mmol) in methanol or ethanol (3 mL). The solution was heated to 40



°C for 2-4 hours. The reaction was monitored by thin layer chromatography using C18 plates. Upon completion, the solution was concentrated under reduced pressure. The residue was acidified with 1 N hydrochloric acid (25 mL) and extracted with ethyl acetate. The organic layer was then washed with water and brine, dried with magnesium sulfate, filtered and concentrated under reduced pressure yielding the carboxylic acid (21 mg, 89%)

The carboxylic acid of **7e** (21 mg, 0.042 mmol) was dissolved in ethyl acetate or dioxane (2 mL). To this solution was added 4 N hydrochloric acid in dioxane or ethyl acetate (3 mL). The reaction was allowed to stir at ambient temperature for 12-24 hours. The solvent was removed under reduced pressure. The resulting solid was rinsed with a minimal volume of ethyl acetate and hexanes, and the hydrochloride salt was collected by filtration (9 mg, 40%). <sup>1</sup>H NMR (500 MHz, CD<sub>3</sub>OD): δ = 7.27 (s, 1H), 7.25 (s, 1H), 7.22-7.11 (m, 10H), 7.06 (s, 1H), 7.05 (s, 1H), 6.78 (d, *J* = 8.5 Hz, 1H), 6.74 (d, *J* = 9.0 Hz, 1H), 4.50 (s, 2H), 4.10 (t, *J* = 5.3 Hz, 2H), 4.04 (s, 2H), 3.94 (s, 2H), 3.34 (t, 2H), 2.72 (s, 6H) ppm

#### **2-(1,1'-Biphenyl-3,3'-diisopropyl-4'-[2-(dimethylamino) ethoxy]-4-oxy) acetic acid (1b)**

Same procedure as **1e**. Hydrolysis resulted in 100 % conversion. <sup>1</sup>H NMR (500 MHz, CD<sub>3</sub>OD): δ = 7.37 (d, *J* = 1.5 Hz, 1H), 7.36 (d, *J* = 2 Hz, 1H), 7.22 (dd, *J* = 8.5, 2.5 Hz, 1H), 7.17 (dd, *J* = 8.5, 2.5 Hz, 1H), 6.88 (d, *J* = 8.5 Hz, 1H), 6.82 (d, *J* = 8.0 Hz, 1H), 4.57 (s, 2H), 4.33 (t, *J* = 4.5 Hz, 2H), 3.61 (t, *J* = 4.5 Hz, 2H), 3.49 (7let, *J* = 6.8 Hz, 1H), 3.39 (7let, *J* = 6.8 Hz, 1H), 3.01 (s, 6H), 1.27 (d, *J* = 7.0 Hz, 6H), 1.24 (d, *J* = 7.5 Hz, 6H) ppm. Further conversion to the hydrochloride salt proceeded in 59 % yield.

#### **2-(1,1'-Biphenyl-3,3'-disec-butyl-4'-[2-(dimethylamino) ethoxy]-4-oxy) acetic acid (1c)**

Same procedure as **1e**. Hydrolysis resulted in 72% isolated yield. <sup>1</sup>H NMR (500 MHz, CDCl<sub>3</sub>-d): δ 7.34 (m, 4H), 7.07 (d, *J* = 8.5 Hz, 1H), 6.90 (d, *J* = 8 Hz, 1H), 4.70 (s, 2H), 4.41 (br s, 2H), 3.68 (br s, 2H), 3.24 (m, 2H), 3.06 (s, 6H), 1.70 (m, 4H), 1.28 (d, *J* = 4.5 Hz, 2H), 1.27 (d, *J* = 4 Hz, 2H), 0.90 (t, *J* = 7.5 Hz, 3H), 0.89 (t, *J* = 7.5 Hz, 3H) ppm. Further conversion to the hydrochloride salt proceeded in 40% yield.

#### **2-(1,1'-biphenyl-3,3'-ditert-butyl-4'-[2-(dimethylamino) ethoxy]-4-oxy) acetic acid (1d)**

Same procedure as **1e**. Hydrolysis resulted in 89% isolated yield. <sup>1</sup>H NMR (500 MHz, CDCl<sub>3</sub>-d): δ 7.37 (d, *J* = 1.5 Hz, 1H), 7.34 (d, *J* = 2.5 Hz, 1H), 7.26 (dd, *J* = 8.5 Hz, 2.5 Hz, 1H), 7.20 (dd, *J* = 8.5 Hz, 2 Hz, 1H), 6.98 (d, *J* = 8 Hz, 1 H), 6.79 (d, *J* = 8.5 Hz, 1H), 4.57 (s, 2H), 4.33 (br t, *J* = 4.5 Hz, 2H), 3.58 (br t, *J* = 5 Hz, 2H), 2.95 (s, 6H), 1.36 (s, 9H), 1.35 (s, 9H) ppm. Further conversion to the hydrochloride salt proceeded in 79% yield.

## Synthesis of compound 1a.

### Preparation of Ethyl 2-(4-iodophenoxy)acetate (5a)

4-Iodophenol (1.1 g, 5 mmol) was dissolved in dry THF (45 mL). Sodium hydride, (60 % in oil, 0.28 g, 7 mmol) was added and the solution was stirred at room temperature for 30 minutes. Ethyl bromoacetate (1.2 g, 7 mmol) was then added slowly and the solution was stirred for 1.5 hours at room temperature. The reaction mixture was diluted with ethyl acetate and washed with water (x2). After drying over magnesium sulfate, the mixture was purified by column chromatography on silica gel (Hexane/EtOAc, 80:20) to afford 1.02 g (67%) of the desired product as a solid (m.p. 57-61 °C). <sup>1</sup>H NMR (500 MHz, CDCl<sub>3</sub>): δ = 7.57 (d, *J* = 7 Hz, 2H), 6.69 (d, *J* = 6.5 Hz, 2H), 4.59 (s, 2H), 4.27 (q, *J* = 7Hz, 2 H), 1.30 (t, *J* = 6.5 Hz, 3H) ppm.

### Preparation of Ethyl 2-(1,1'-biphenyl-4'-ol-4-oxy) acetate (6a)

2-(4-Iodo-phenyl)-4-oxy acetic acid (0.100g, 1equiv) and 4-hydroxyphenylboronic acid (0.0541g, 1.2 equiv) were combined with PdCl<sub>2</sub>(PPh<sub>3</sub>)<sub>2</sub> (0.0230g, 10 mol %), triphenyl phosphine (0.00858g, 10 mol %) and 2M sodium carbonate (0.0858g) in a sealed vial and dissolved in 4mL THF and 1mL H<sub>2</sub>O. The reaction underwent microwave irradiation at 110°C for 20 minutes using a Biotage Initiator (TM) 2.0. The crude reaction mixture was concentrated and purified by flash chromatography on silica gel(Hexane/EtOAc 90:10) to afford 0.030g (34%) of the desire product as a white solid (m.p. 131-133 °C). <sup>1</sup>H NMR (500 MHz, CDCl<sub>3</sub>): δ = 7.45 (d, *J* = 7 Hz, 2H), 7.41 (d, *J* = 6.5 Hz, 2H), 6.95 (d, *J* = 6.5 Hz, 2H), 6.87 (d, *J* = 6.5 Hz, 2H), 4.97 (s, 1H), 4.66 (s, 2H), 4.29 (q, *J* = 6.5 Hz, 2H), 1.31 (t, *J* = 7.5 Hz, 3H) ppm

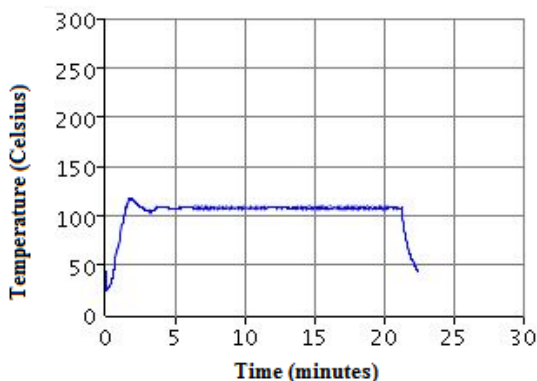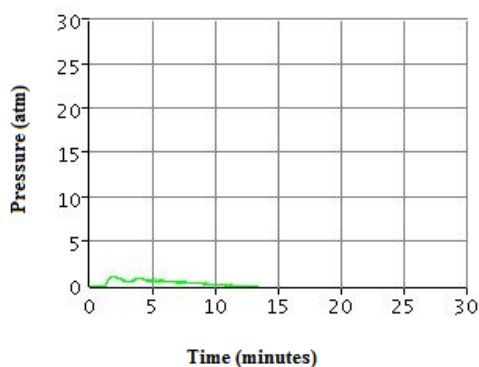

### Preparation of Ethyl 2-(1,1'-biphenyl-4'-[2-(dimethylamino) ethoxy]-4-oxy) acetate (7a)

Same procedure as **7e**. Product was isolated in 74 % yield as a white solid. <sup>1</sup>H NMR (500 MHz, CDCl<sub>3</sub>): δ 7.47 (d, *J* = 7.0 Hz, 2H), 7.46 (d, *J* = 6.5 Hz, 2H), 6.97 (d, *J* = 6.0 Hz, 2H), 6.95 (d, *J* = 6.0 Hz, 2H), 4.65 (s, 2H), 4.29 (q, *J* = 7.5 Hz, 2H), 4.12 (t, *J* = 6.0 Hz, 2H), 2.79 (t, *J* = 5.5 Hz, 2H), 2.39 (s, 6H), 1.31 (t, *J* = 7.5 Hz, 3H) ppm. <sup>13</sup>C NMR (75.5 MHz, CDCl<sub>3</sub>): δ 207.2, 158.2, 157, 134.8, 134, 128.1, 128.0, 115.2, 115.1, 65.8, 61.7, 58.5, 46.0, 31.2, 14.3 ppm

### Preparation of 2-(1,1'-Biphenyl-4'-[2-(dimethylamino) ethoxy]-4-oxy) acetic acid (**1a**)

**1a** was isolated as a sodium salt by stopping the procedure of **1e** after the initial hydrolysis step and recovering the salt from ethyl acetate.

## Biological Methods

### *TR-FRET CBI Assay*

This assay was performed as previously described.<sup>1</sup> Briefly, an N-terminally His-tagged ligand binding domain of ERα (residues 304-554; C381, 530S)<sup>2</sup> was expressed, purified and labeled with biotin-maleimide (Quanta BioDesign) through the one remaining reactive cysteine (Cys417) while bound to a nickel column. The SRC3 nuclear receptor domain (NRD) (residues 627-829) includes all three NR-boxes and was non-specifically labeled through four available cysteines using 5-iodoacetamido-fluorescein (Invitrogen).

The ER was subsequently tagged with a streptavidin-terbium complex (FRET donor, λ<sub>em</sub> = 495 nm) and activated with a high concentration of agonist ligand estradiol to promote recruitment of fluorescein SRC3 (FRET acceptor, λ<sub>em</sub> = 520 nm) and production of a high FRET signal. The biphenyl compounds were then serially diluted and added to each well of the assay mixture to test the ability of these compounds to disrupt the receptor/coactivator interaction and produce a subsequent decrease in FRET. The final concentrations of the reagents were as follows: ERα-417 (2 nM), streptavidin-terbium (0.5 nM), estradiol (1 μM), test compound (0–1 mM), SRC3-NRD (50 nM).

A 15-mer SRC1-Box II peptide and a published guanylylhydrazone coactivator binding inhibitor compound<sup>3</sup> were used as positive controls in the TR-FRET and reporter gene assays, respectively. The compounds showed modest activity in this assay;

<sup>1</sup> Parent, A.A., Gunther, J.R., Carlson, K.E., Katzenellenbogen, J.A. *J. Med. Chem.* **2008**, *51*, 6512-6530.

<sup>2</sup> Tamrazi, A., Carlson, K.E., Daniels, J.R., Hurth, K.M., Katzenellenbogen, J.A. *Mol. Endocrinol.* **2002**, *16*, 2706-2719.

<sup>3</sup> Lafrate, A.L., Gunther, J.R., Carlson, K.E., Katzenellenbogen, J.A. *Bioorganic & Medicinal Chemistry.* **2008**, *16*, 10075-10084.

compound **1c** produced the most complete displacement of coactivator with a  $K_i$  of 33 $\mu$ M in the TR-FRET assay.

### *Radiometric Binding Assay*

Performed as previously described.<sup>4</sup> Relative binding affinities (RBA) were determined using 2 nM [<sup>3</sup>H]estradiol as tracer ([2,4,6,7-<sup>3</sup>H]estra-1,3,5,(10)-triene-3,17 $\beta$ -diol, 89 Ci/mmol, Amersham/GE Healthcare Bio-Sciences Corporation, Piscataway, NJ) and purified full-length human ER $\alpha$  and ER $\beta$  receptors (PanVera/Invitrogen, Carlsbad, CA). Incubations were for 18–24 h at 0 °C. Hydroxyapatite (Bio-Rad, Hercules, CA) was used to absorb the receptor–ligand complexes, and free ligand was washed away. The binding affinities are expressed as relative binding affinity (RBA) values with that of estradiol set to 100%. Estradiol binds to ER $\alpha$  with a  $K_d$  of 0.2 nM and to ER $\beta$  with a  $K_d$  of 0.5 nM.

| Compound  | ER $\alpha$ RBA                            | ER $\beta$ RBA                             |
|-----------|--------------------------------------------|--------------------------------------------|
| <b>1a</b> | <0.001                                     | <0.001                                     |
| <b>1b</b> | <0.001                                     | <0.001                                     |
| <b>1c</b> | ~0.001                                     | ~0.001                                     |
| <b>1d</b> | 0.055<br><u>0.038</u><br>0.049 $\pm$ 0.016 | 0.018<br><u>0.017</u><br>0.018 $\pm$ 0.001 |
| <b>1e</b> | <0.001                                     | ~0.001                                     |

The most promising CBI, compound **1c**, shows insignificant binding as a ligand and should not be considered a traditional antagonist.

### *Luciferase Reporter Gene Assay*

Human endometrial cancer (HEC-1) cells were maintained in culture as described and transfected in 24-well plates.<sup>5</sup> A mixture of HBSS (50  $\mu$ L/well), Holo-transferrin (Sigma T1408) (20  $\mu$ L/well), and lipofectin (Invitrogen #18292-011) (5  $\mu$ L/well) were incubated at room temperature for 5 min. The DNA mixture was made by adding 200 ng of pCMV $\beta$ -galactosidase as internal control, 500 ng of the estrogen-responsive reporter gene plasmid 2ERE Luc, and 100 ng of full-length ER $\alpha$  expression vector with 75  $\mu$ L HBSS per well and, after addition to the first mixture, allowed to incubate for 20 min at room temperature. The cell media were changed to Opti-MEM (350  $\mu$ L/well) and 150  $\mu$ L of the transfection mixture was added to each well. The cells were incubated at 37 °C in a 5% CO<sub>2</sub> containing incubator for 6 h. The medium was then replaced with fresh medium containing 5% charcoal–dextran-treated calf serum and the desired concentrations of

<sup>4</sup> Carlson, K.E., Choi, I., Gee, A., Katzenellenbogen, B.S., Katzenellenbogen, J.A. *Biochemistry*. **1997**, *36*, 14897-14905.

<sup>5</sup> J. Sun, M.J. Meyers, B.E. Fink, R. Rajendran, J.A. Katzenellenbogen and B.S. Katzenellenbogen, *Endocrinology* **140** (1999), p. 800.

compounds. Reporter gene activity was assayed at 24 h after compound addition. Luciferase activity, normalized for the internal control  $\beta$ -galactosidase activity, was assayed as previously described. In the initial screen, antagonist activity was determined at four concentrations, ranging from 20 to 0.6  $\mu$ M, in the presence of  $10^{-9}$  M estradiol ( $E_2$ ).

STANDARD PROTON PARAMETERS

PW-1-36

Pulse Sequence: s2pu1

Solvent: CDC13  
Ambient temperature  
INOVA-500 "waters500"

Pulse 45.0 degrees  
Acq. time 2.048 sec  
Width 8000.0 Hz  
16 repetitions  
OBSERVE H1, 499.7029602 MHz  
DATA PROCESSING  
FT size 32768  
Total time 0 min, 32 sec

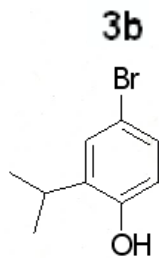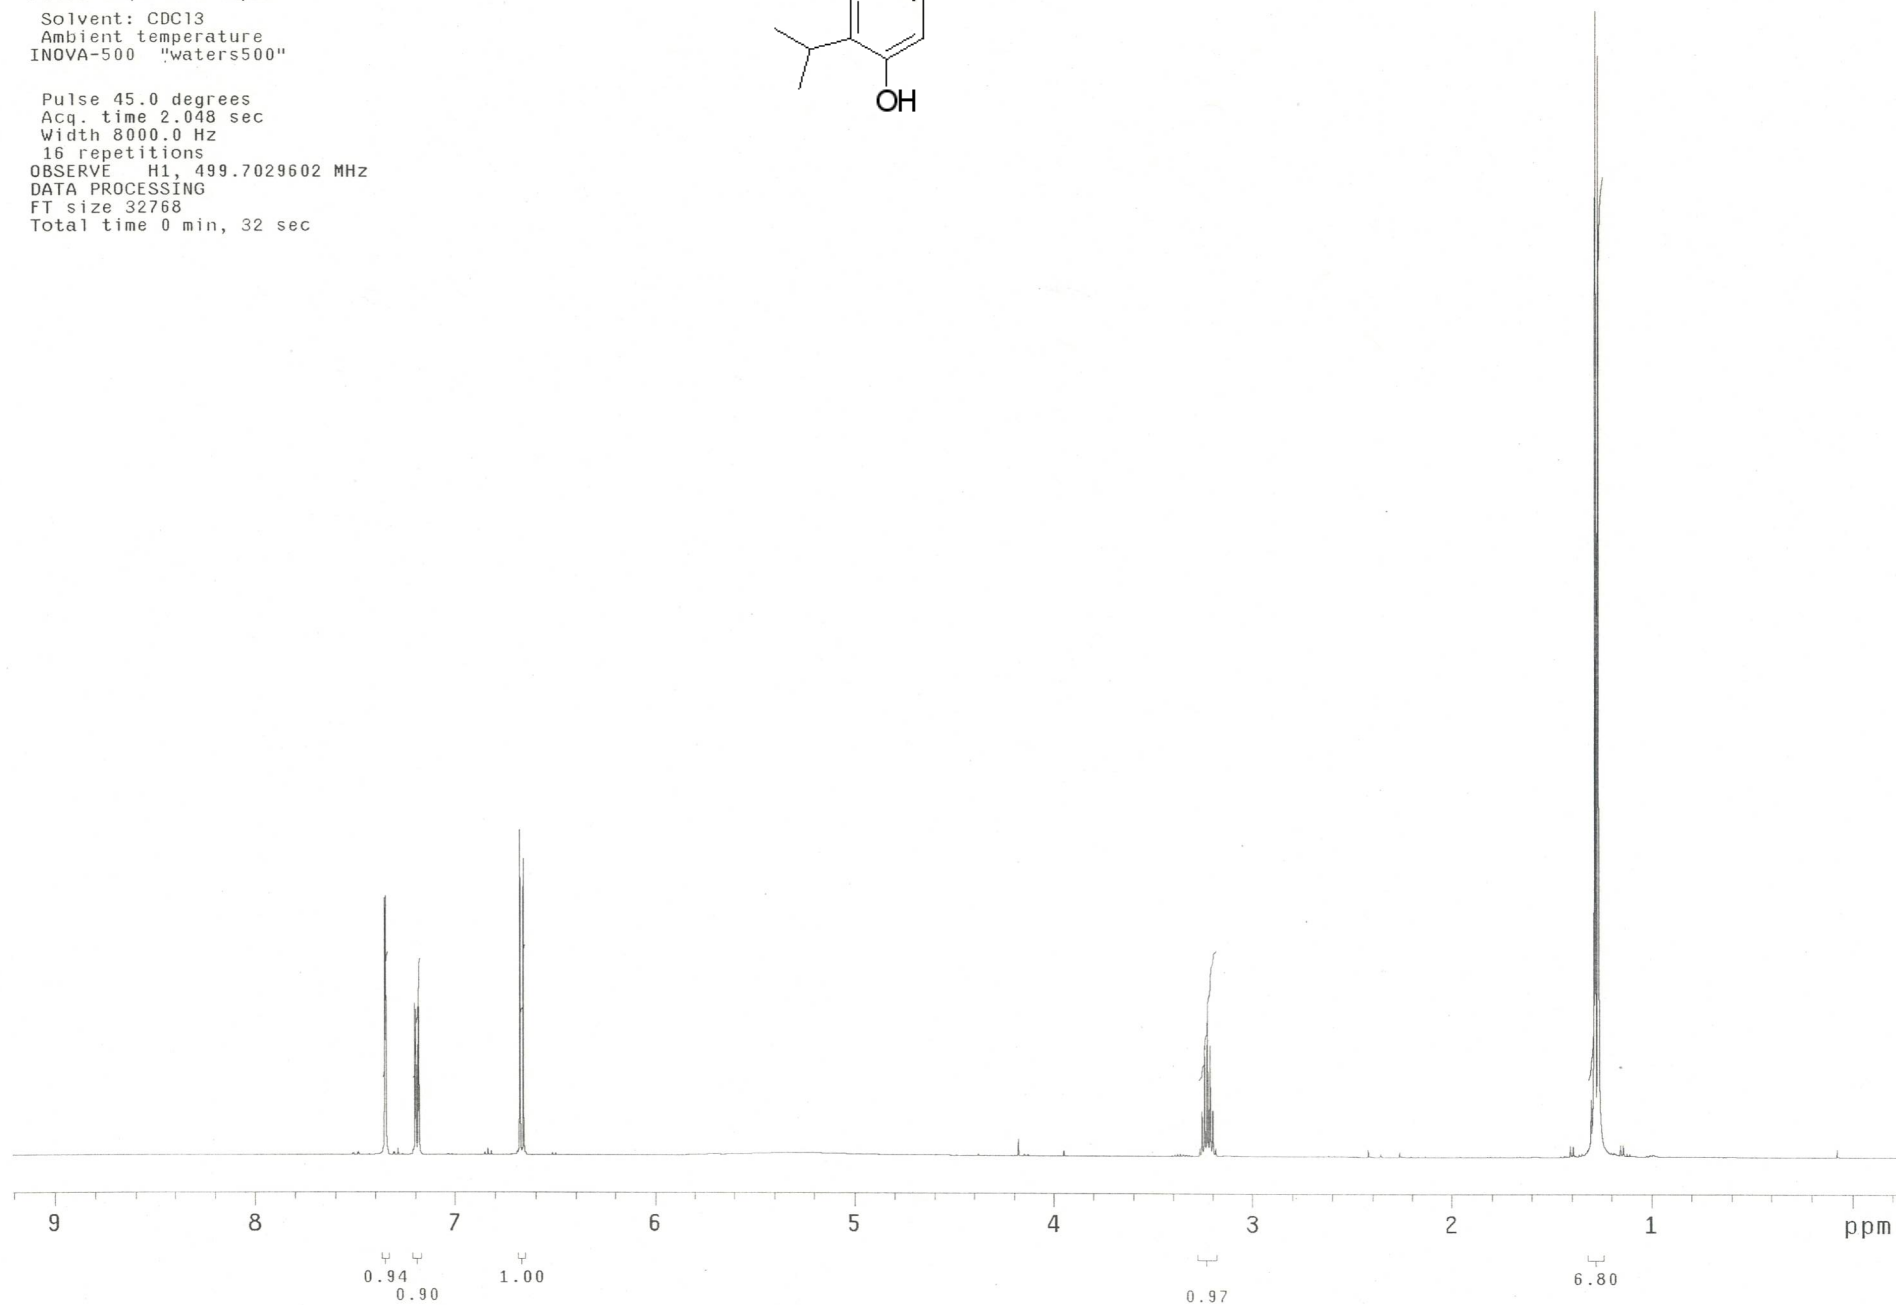

AW-111-68-11

Pulse Sequence: s2pul

Solvent: CDCl3

Ambient temperature

INOVA-500 "waters500"

Pulse: 45.0 degrees

Acq. time 2.048 sec

Width 8000.0 Hz

16 repetitions

OBSERVE H1, 499.7127366 MHz

DATA PROCESSING

FT size 32768

Total time 0 min, 32 sec

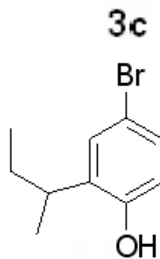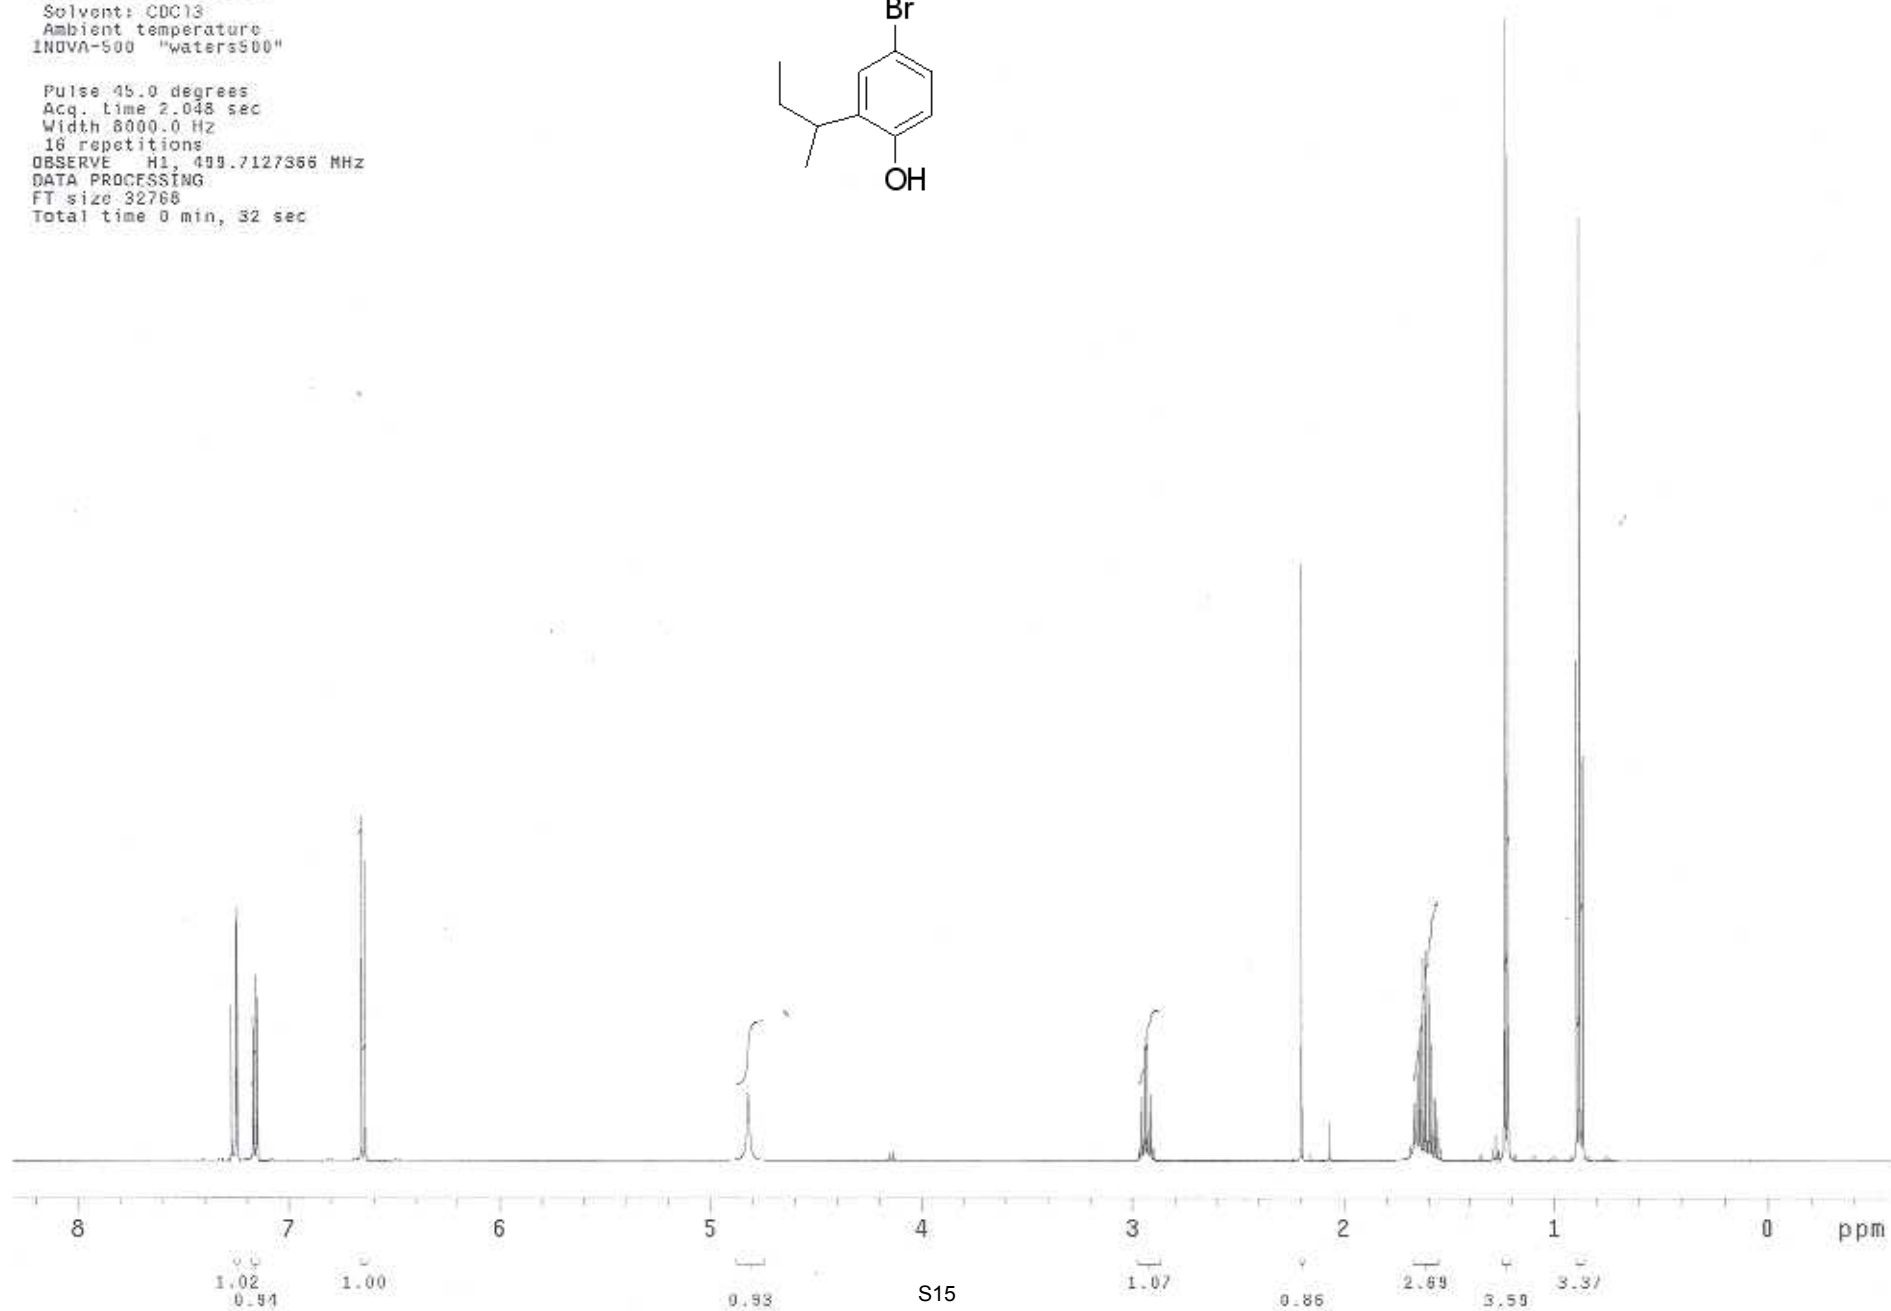

S15

AW-111-68-13

Pulse Sequence: s2pu1  
Solvent: CDCl3  
Ambient temperature  
INNOVA-500 "waters500"

Pulse 45.0 degrees  
Acq. time 2.048 sec  
Width 8000.0 Hz  
16 repetitions  
OBSERVE H1, 499.7127365 MHz  
DATA PROCESSING  
FT size 32768  
Total time 0 min, 32 sec

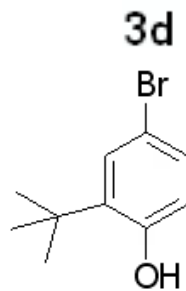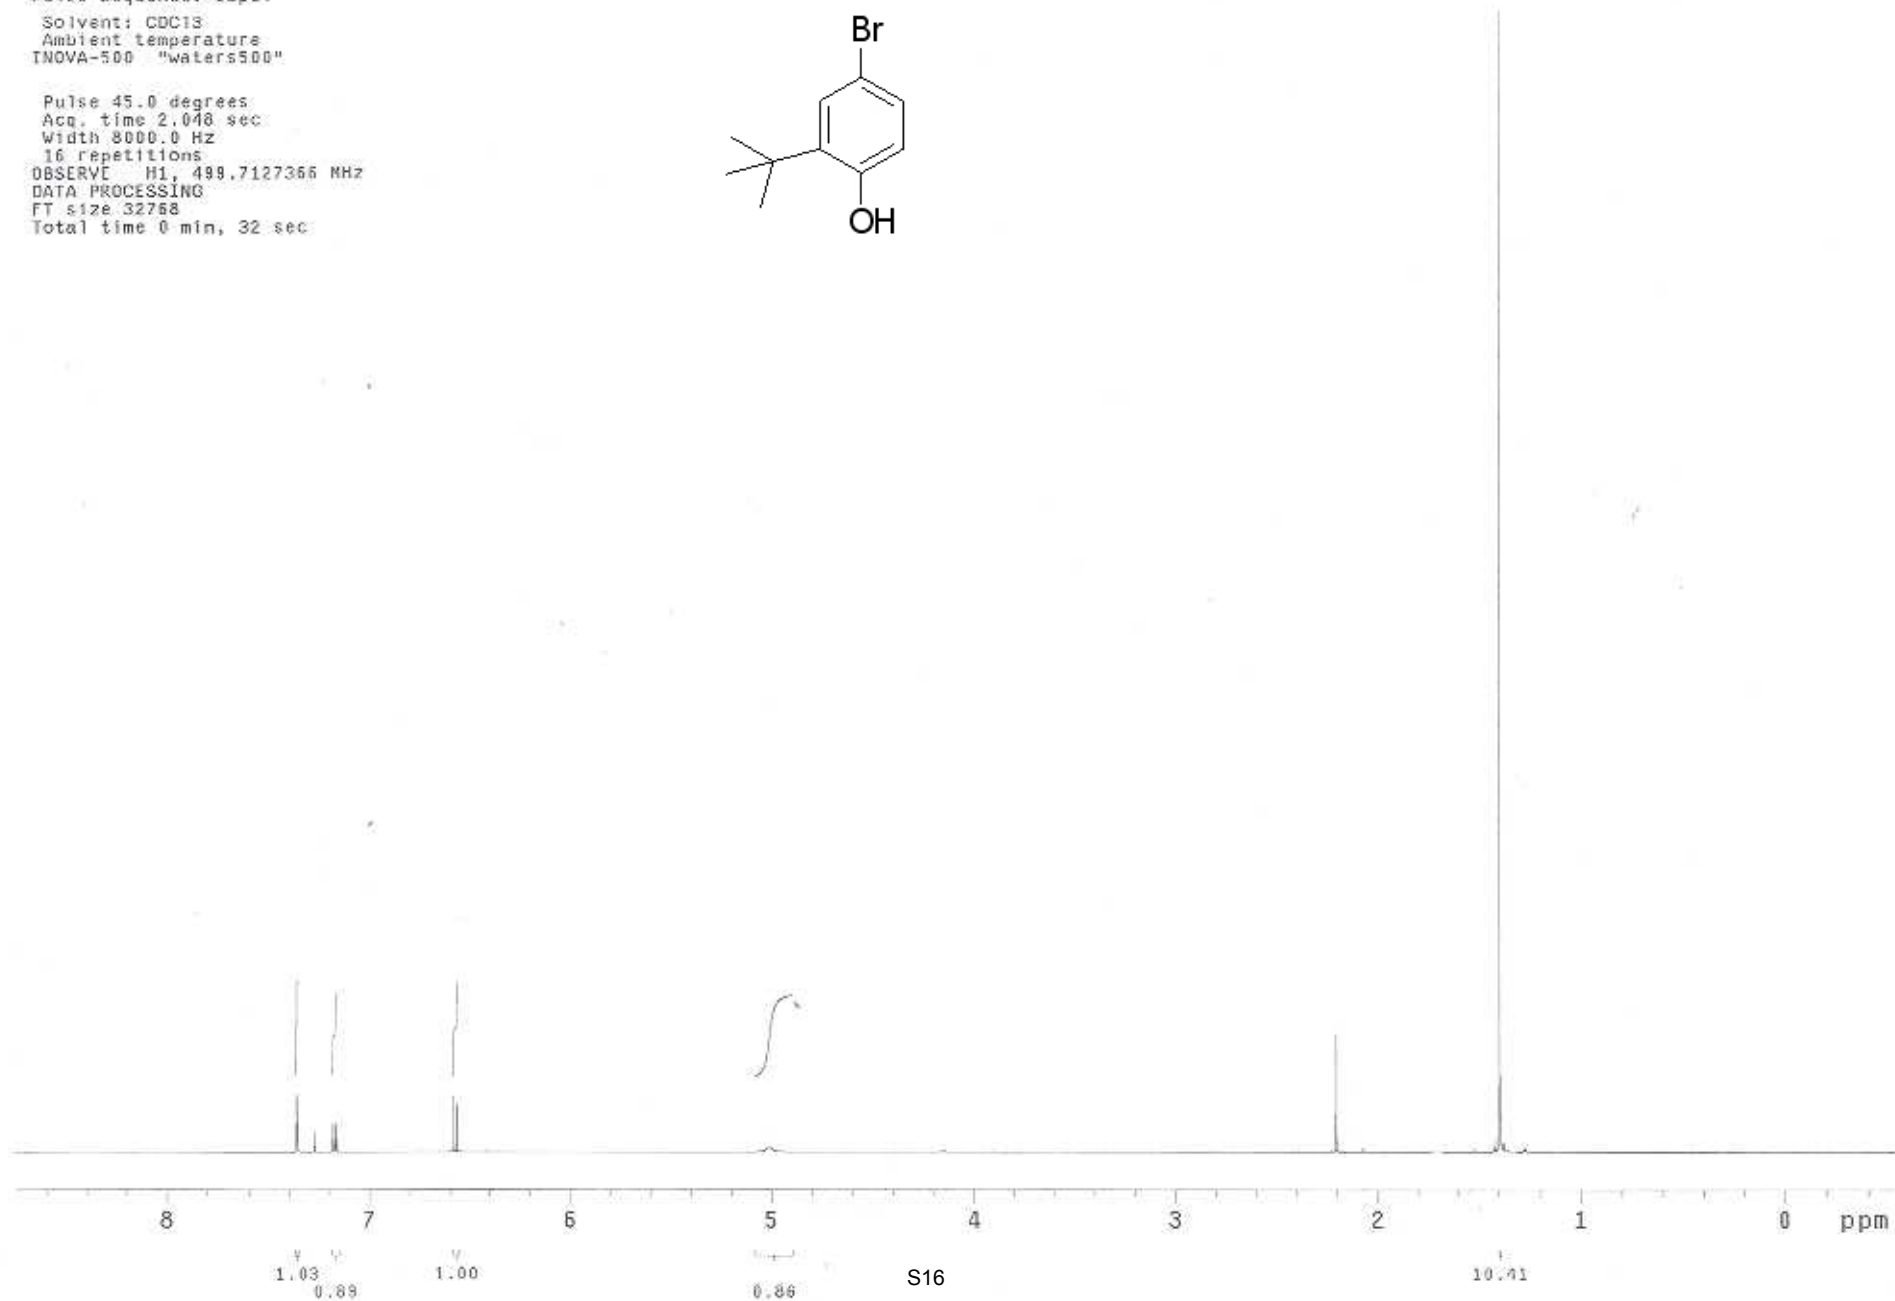



STANDARD PROTON PARAMETERS

PW-1-35

Pulse Sequence: s2pu1

Solvent: CDC13

Ambient temperature

File: PW-1-35

INOVA-500 "waters500"

Pulse 45.0 degrees

Acq. time 2.048 sec

Width 8000.0 Hz

16 repetitions

OBSERVE H1, 499.7029798 MHz

DATA PROCESSING

FT size 32768

Total time 0 min, 32 sec

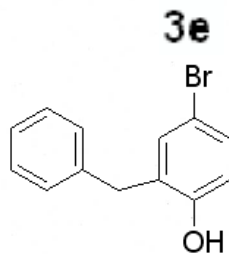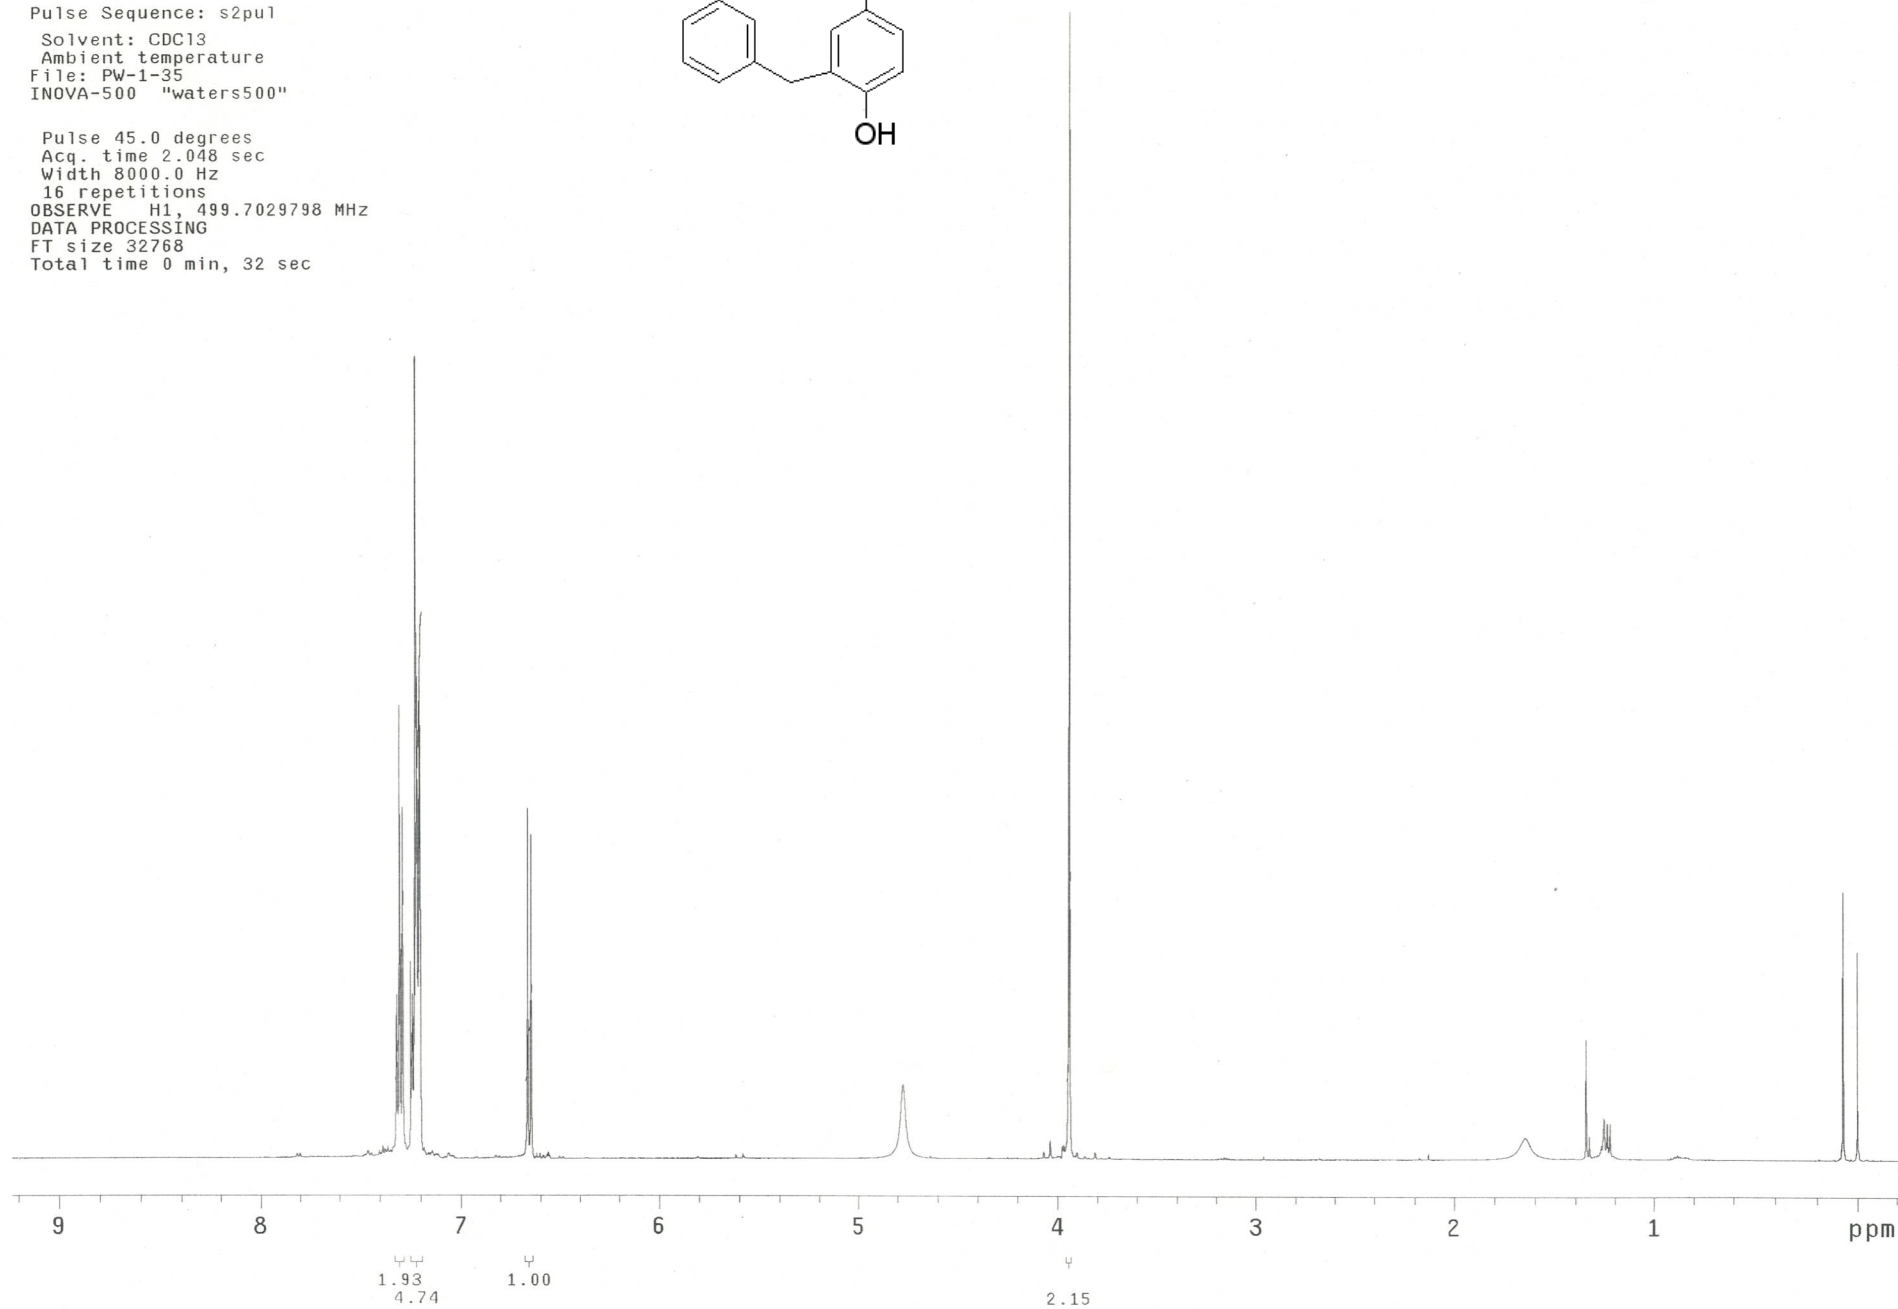

STANDARD PROTON PARAMETERS

PW-1-71

Pulse Sequence: s2pu1

Solvent: CDC13

Ambient temperature

INOVA-500 "waters500"

Pulse 45.0 degrees

Acq. time 2.048 sec

Width 8000.0 Hz

16 repetitions

OBSERVE H1, 499.7029602 MHz

DATA PROCESSING

FT size 32768

Total time 0 min, 32 sec

4b

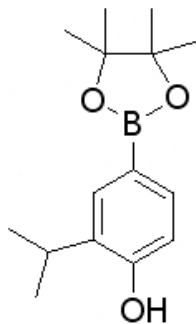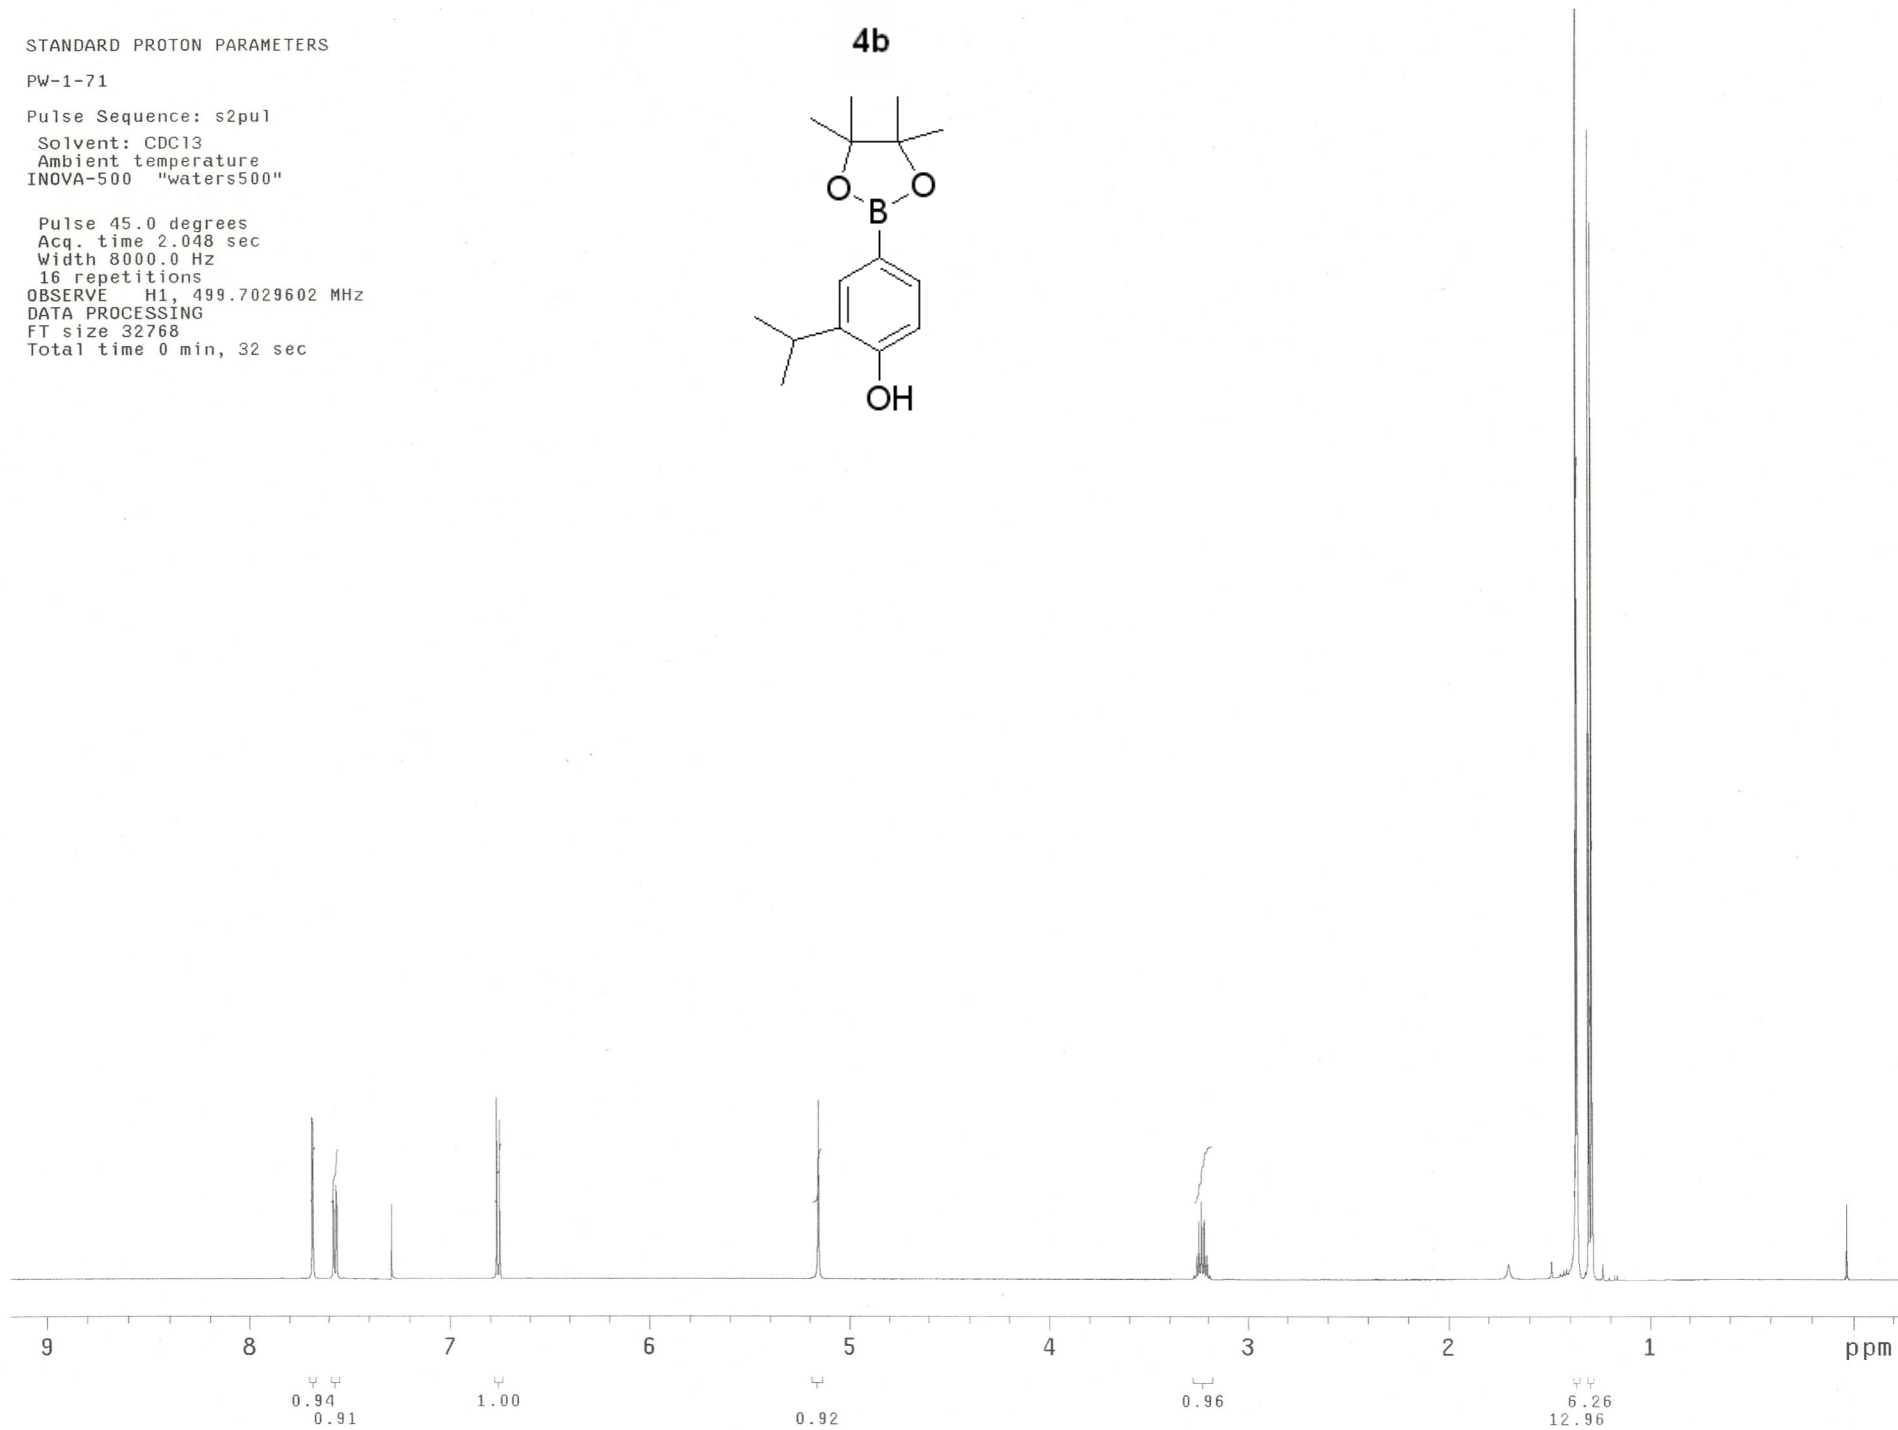

AW-III-64-14c

Pulse Sequence: s2pu1  
Solvent: CDCl3  
Ambient temperature  
INOVA-500 "waters500"

Pulse 45.0 degrees  
Acq. time 2.048 sec  
Width 8000.0 Hz  
16 repetitions  
OBSERVE H1, 499.7127366 MHz  
DATA PROCESSING  
FT size 32768  
Total time 0 min, 32 sec

4c

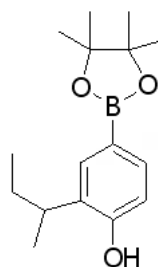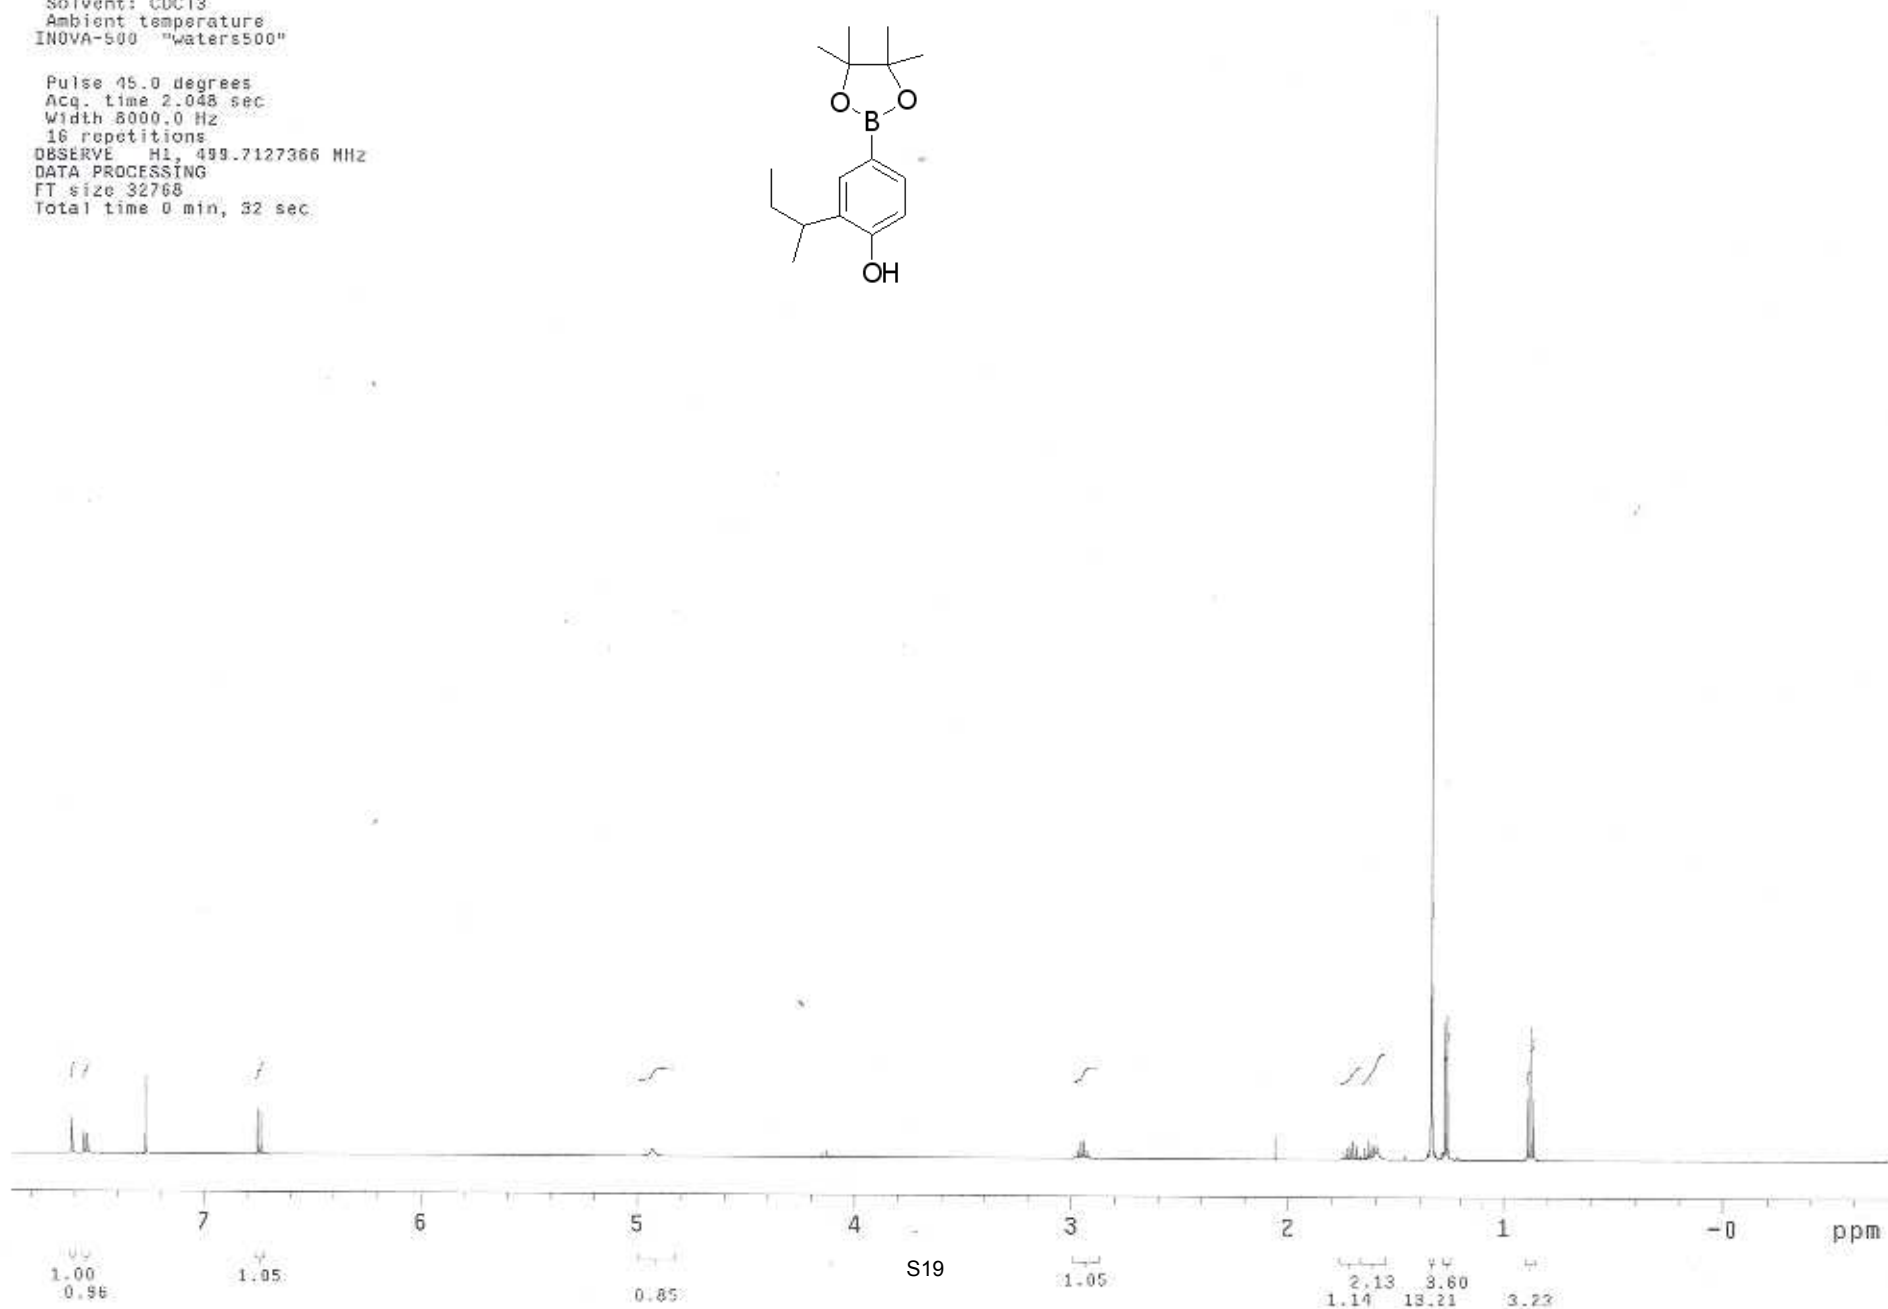

AW-111-69-28b

STANDARD PROTON PARAMETERS

Pulse Sequence: s2pu1

Solvent: CDCl3  
Ambient temperature  
INOVA-500 "waters500"

Pulse 45.0 degrees  
Acq. time 2.048 sec  
Width 8000.0 Hz  
16 repetitions  
OBSERVE H1, 499.7127416 MHz  
DATA PROCESSING  
F1 size 32768  
Total time 0 min, 32 sec

4d

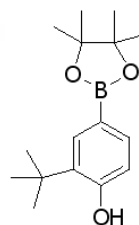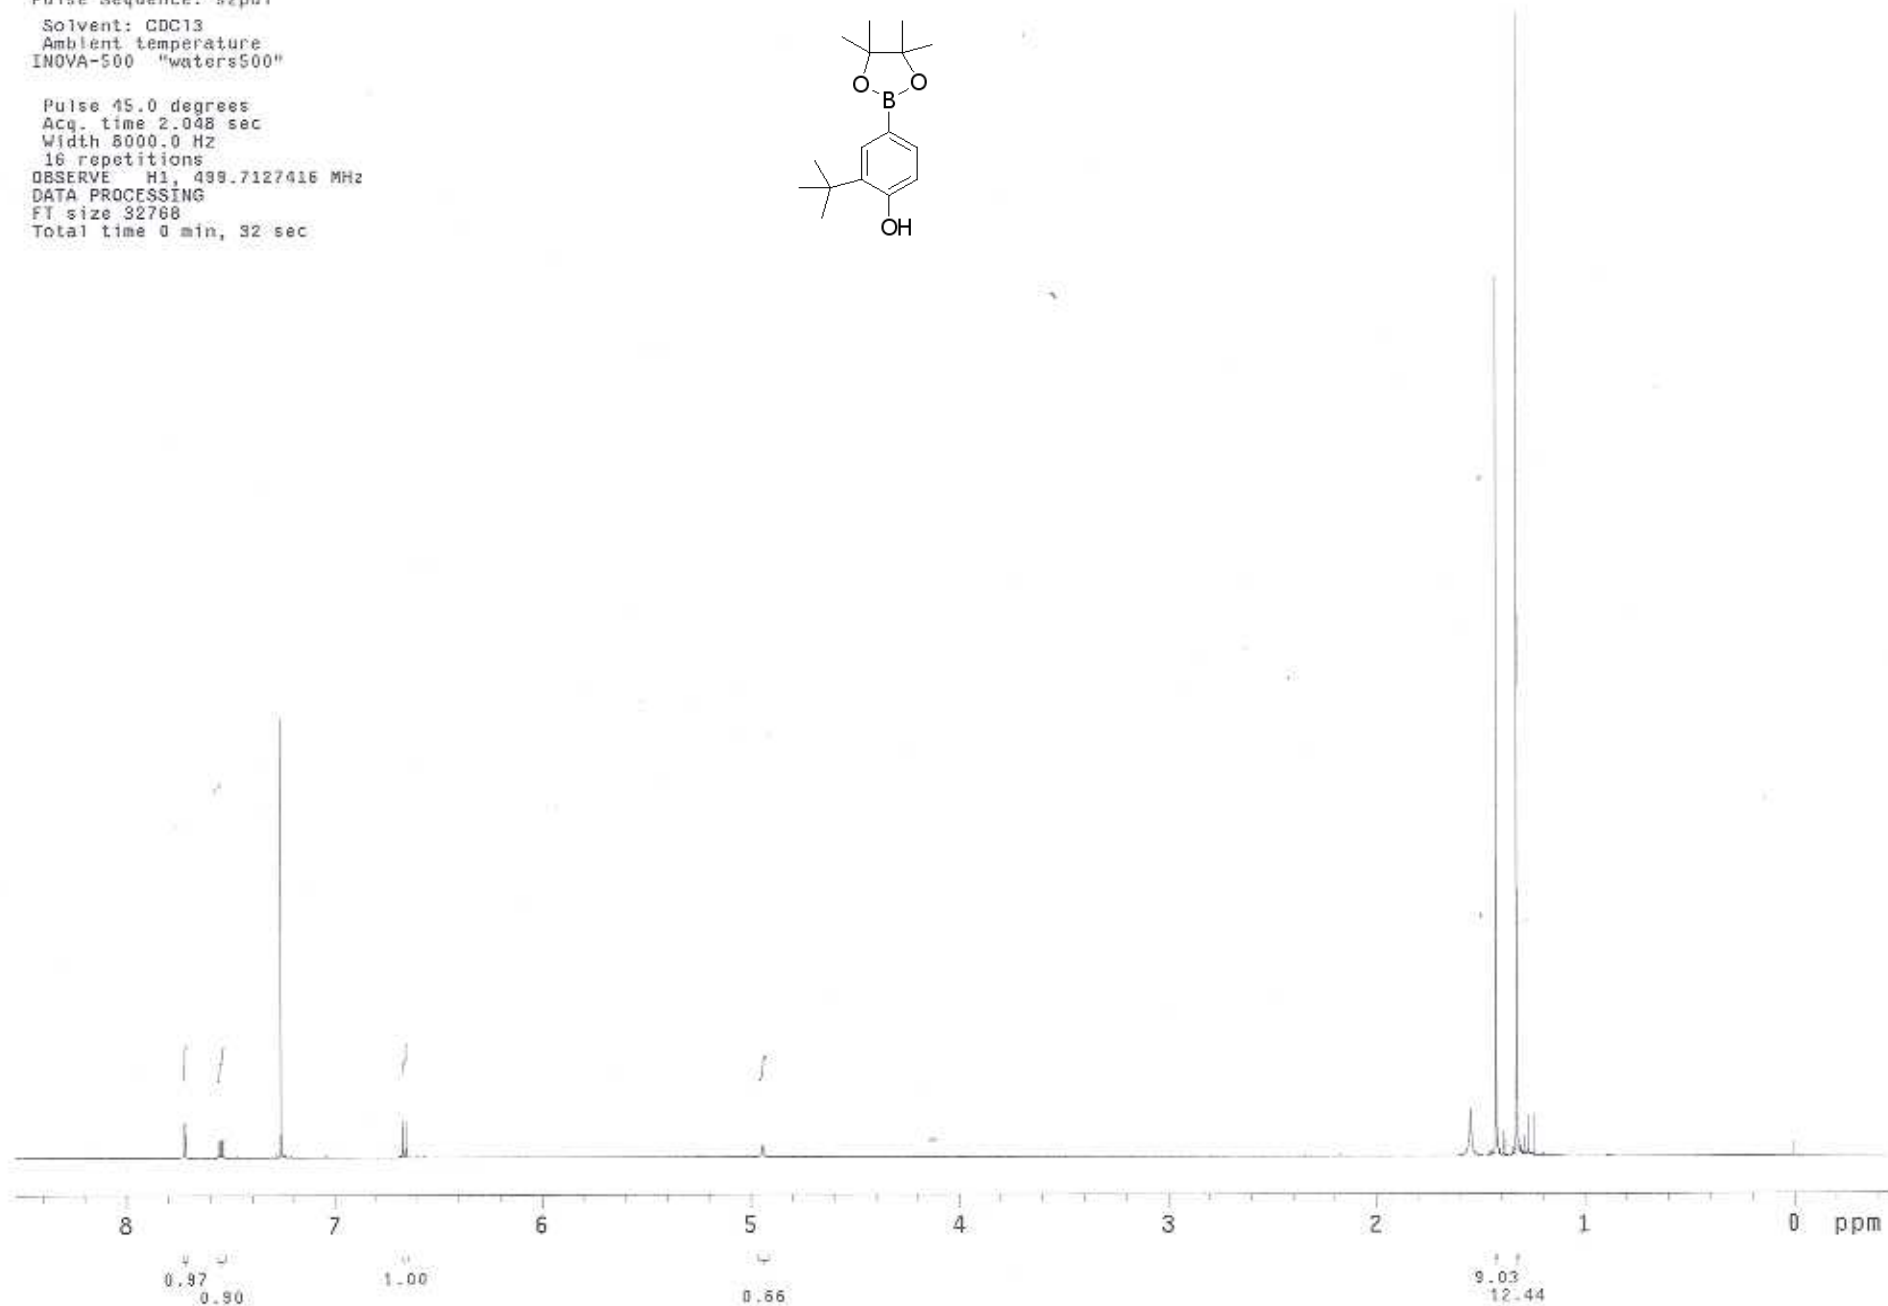

STANDARD PROTON PARAMETERS

PW-1-75

Pulse Sequence: s2pu1

Solvent: CDC13

Ambient temperature

INOVA-500 "waters500"

Pulse 45.0 degrees

Acq. time 2.048 sec

Width 8000.0 Hz

16 repetitions

OBSERVE H1, 499.7029602 MHz

DATA PROCESSING

FT size 32768

Total time 0 min, 32 sec

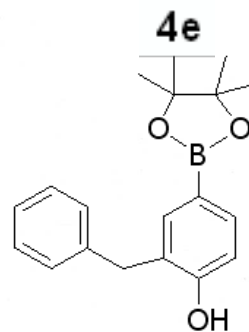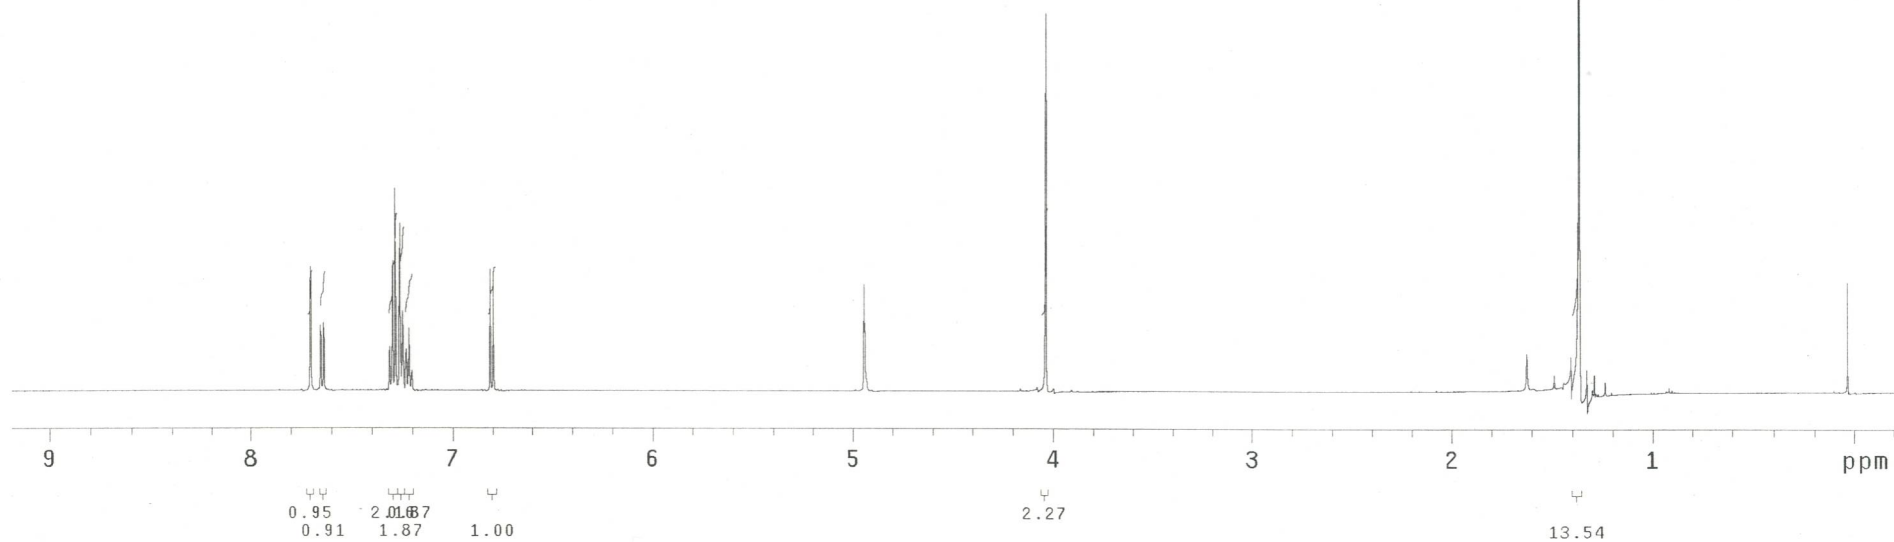

AW-III-81-53

STANDARD PROTON PARAMETERS

Pulse Sequence: s2pu1

Solvent: CDC13

Ambient temperature

INOVA-500 "waters500"

Pulse 45.0 degrees

Acq. time 2.048 sec

Width 8000.0 Hz

16 repetitions

OBSERVE H1, 499.7029724 MHz

DATA PROCESSING

FT size 32768

Total time 0 min, 32 sec

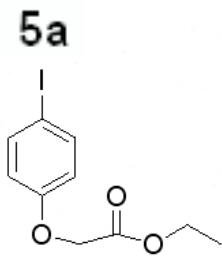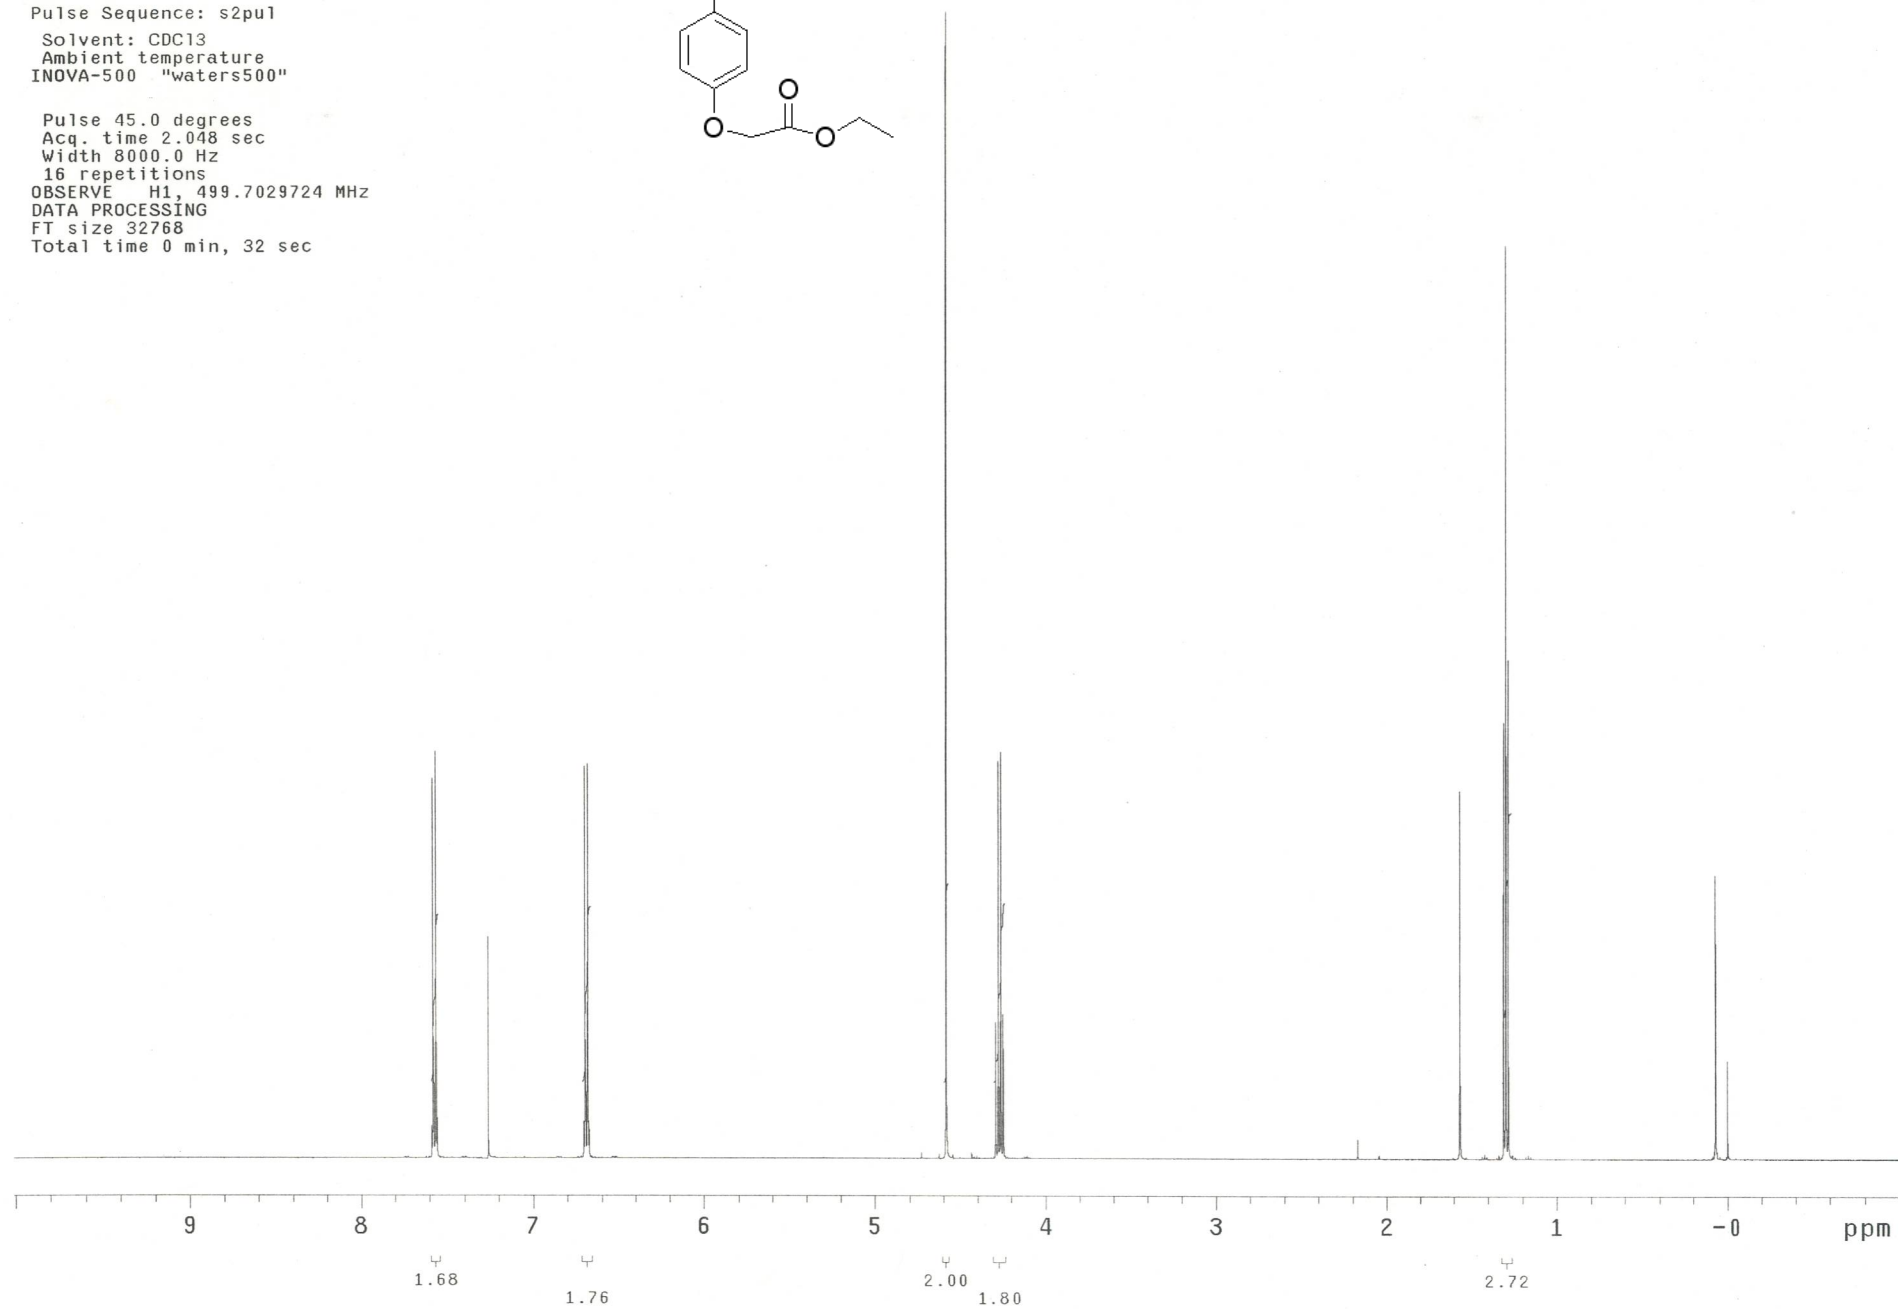

STANDARD PROTON PARAMETERS

PW-1-44

Pulse Sequence: s2pu1

Solvent: CDCl3  
Ambient temperature  
INOVA-500 "waters500"

Pulse 45.0 degrees  
Acq. time 2.048 sec  
Width 8000.0 Hz  
16 repetitions  
OBSERVE H1, 499.7029602 MHz  
DATA PROCESSING  
FT size 32768  
Total time 0 min, 32 sec

5b

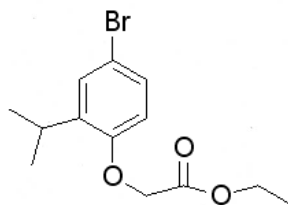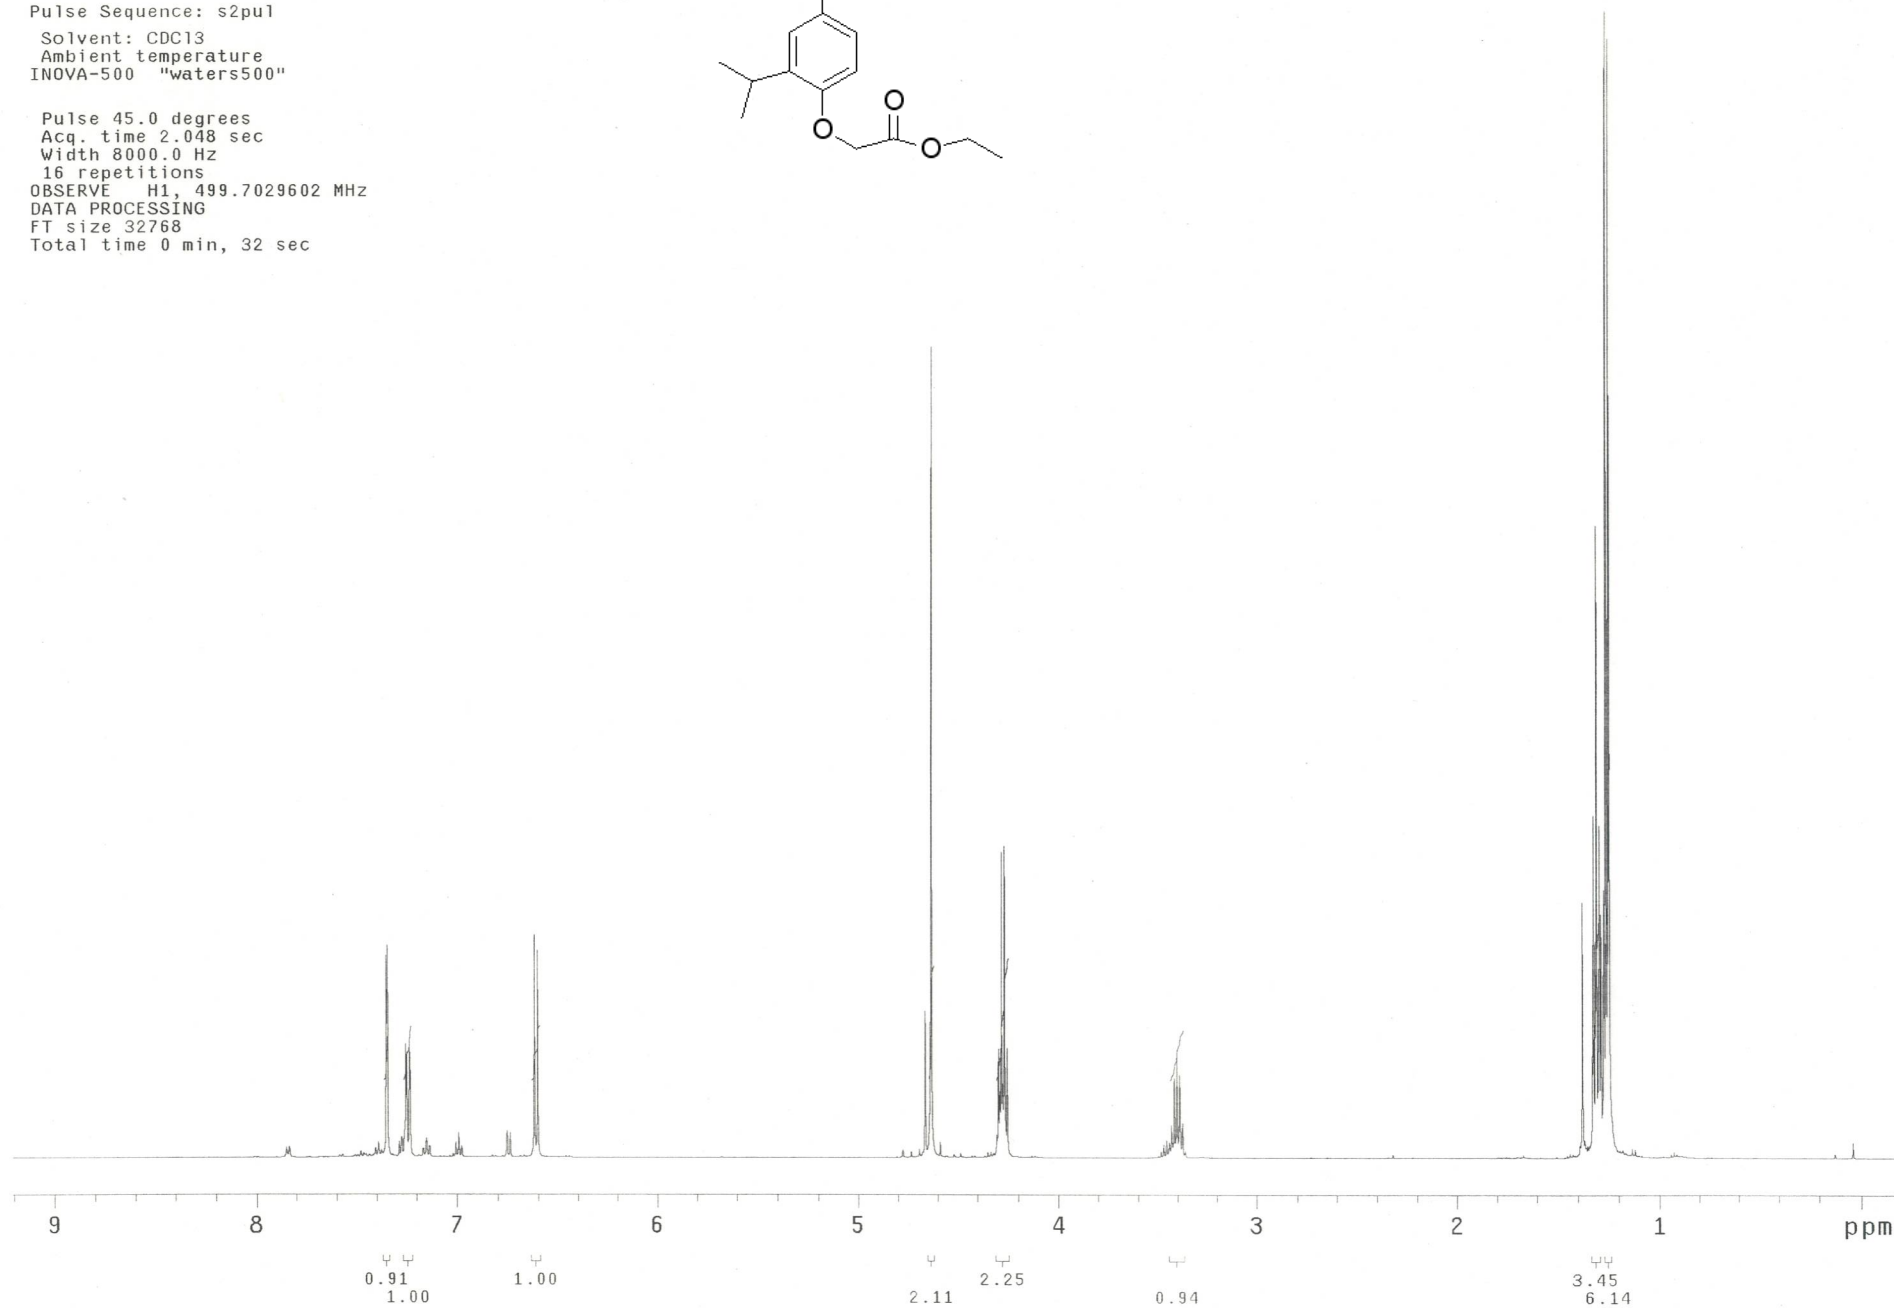

S23

AW-111-89-71

Pulse Sequence: s2pu1

Solvent: CDCl3  
Ambient temperature  
INNOVA-500 "waters500"

Pulse 45.0 degrees  
Acq. time 2.048 sec  
Width 8000.0 Hz  
16 repetitions  
OBSERVE H1, 499.7127366 MHz  
DATA PROCESSING  
FT size 32768  
Total time 0 min, 32 sec

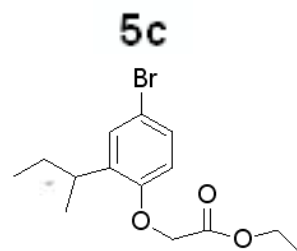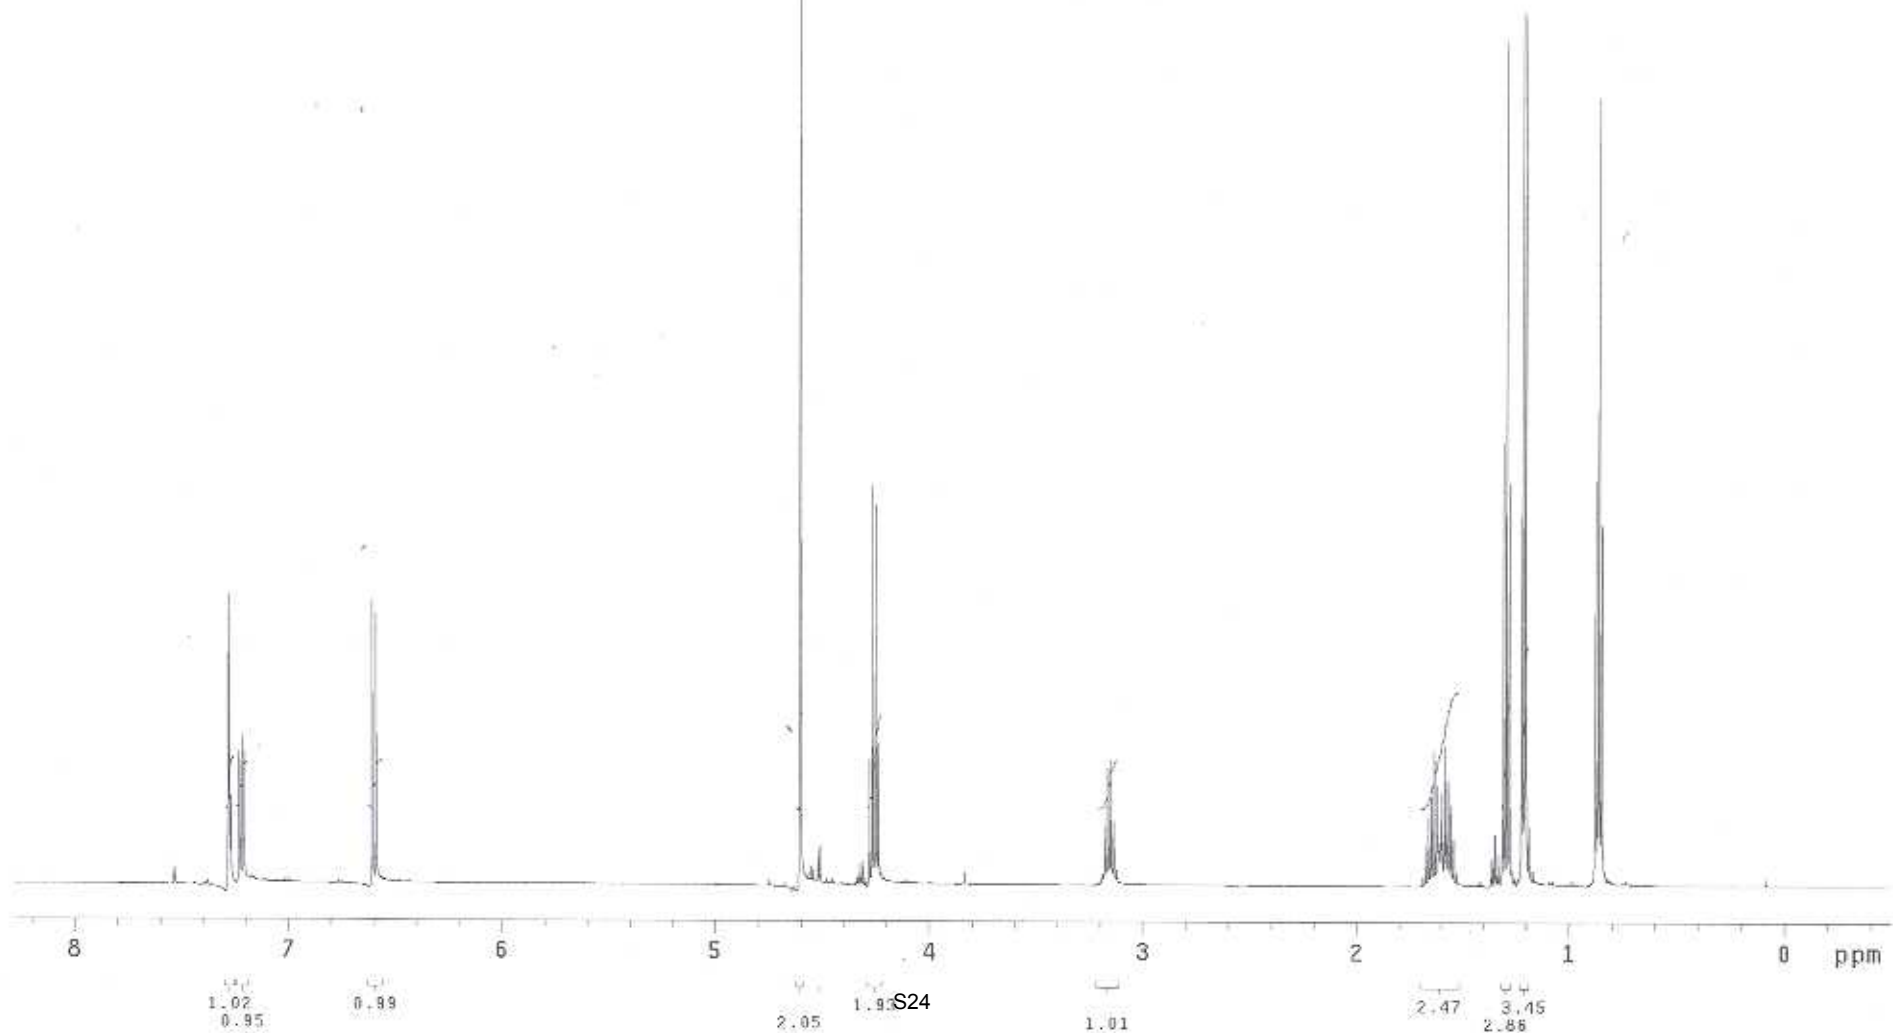



AW-II-32-48a

STANDARD PROTON PARAMETERS

Pulse Sequence: s2pu1

Solvent: CDCl3

Ambient temperature

INOVA-500 "waters500"

Pulse 45.0 degrees

Acq. time 2.048 sec

Width 8000.0 Hz

16 repetitions

OBSERVE H1, 499.7029743 MHz

DATA PROCESSING

FT size 32768

Total time 0 min, 32 sec

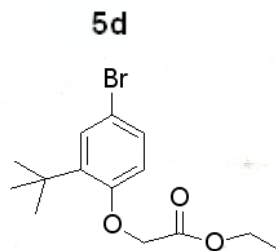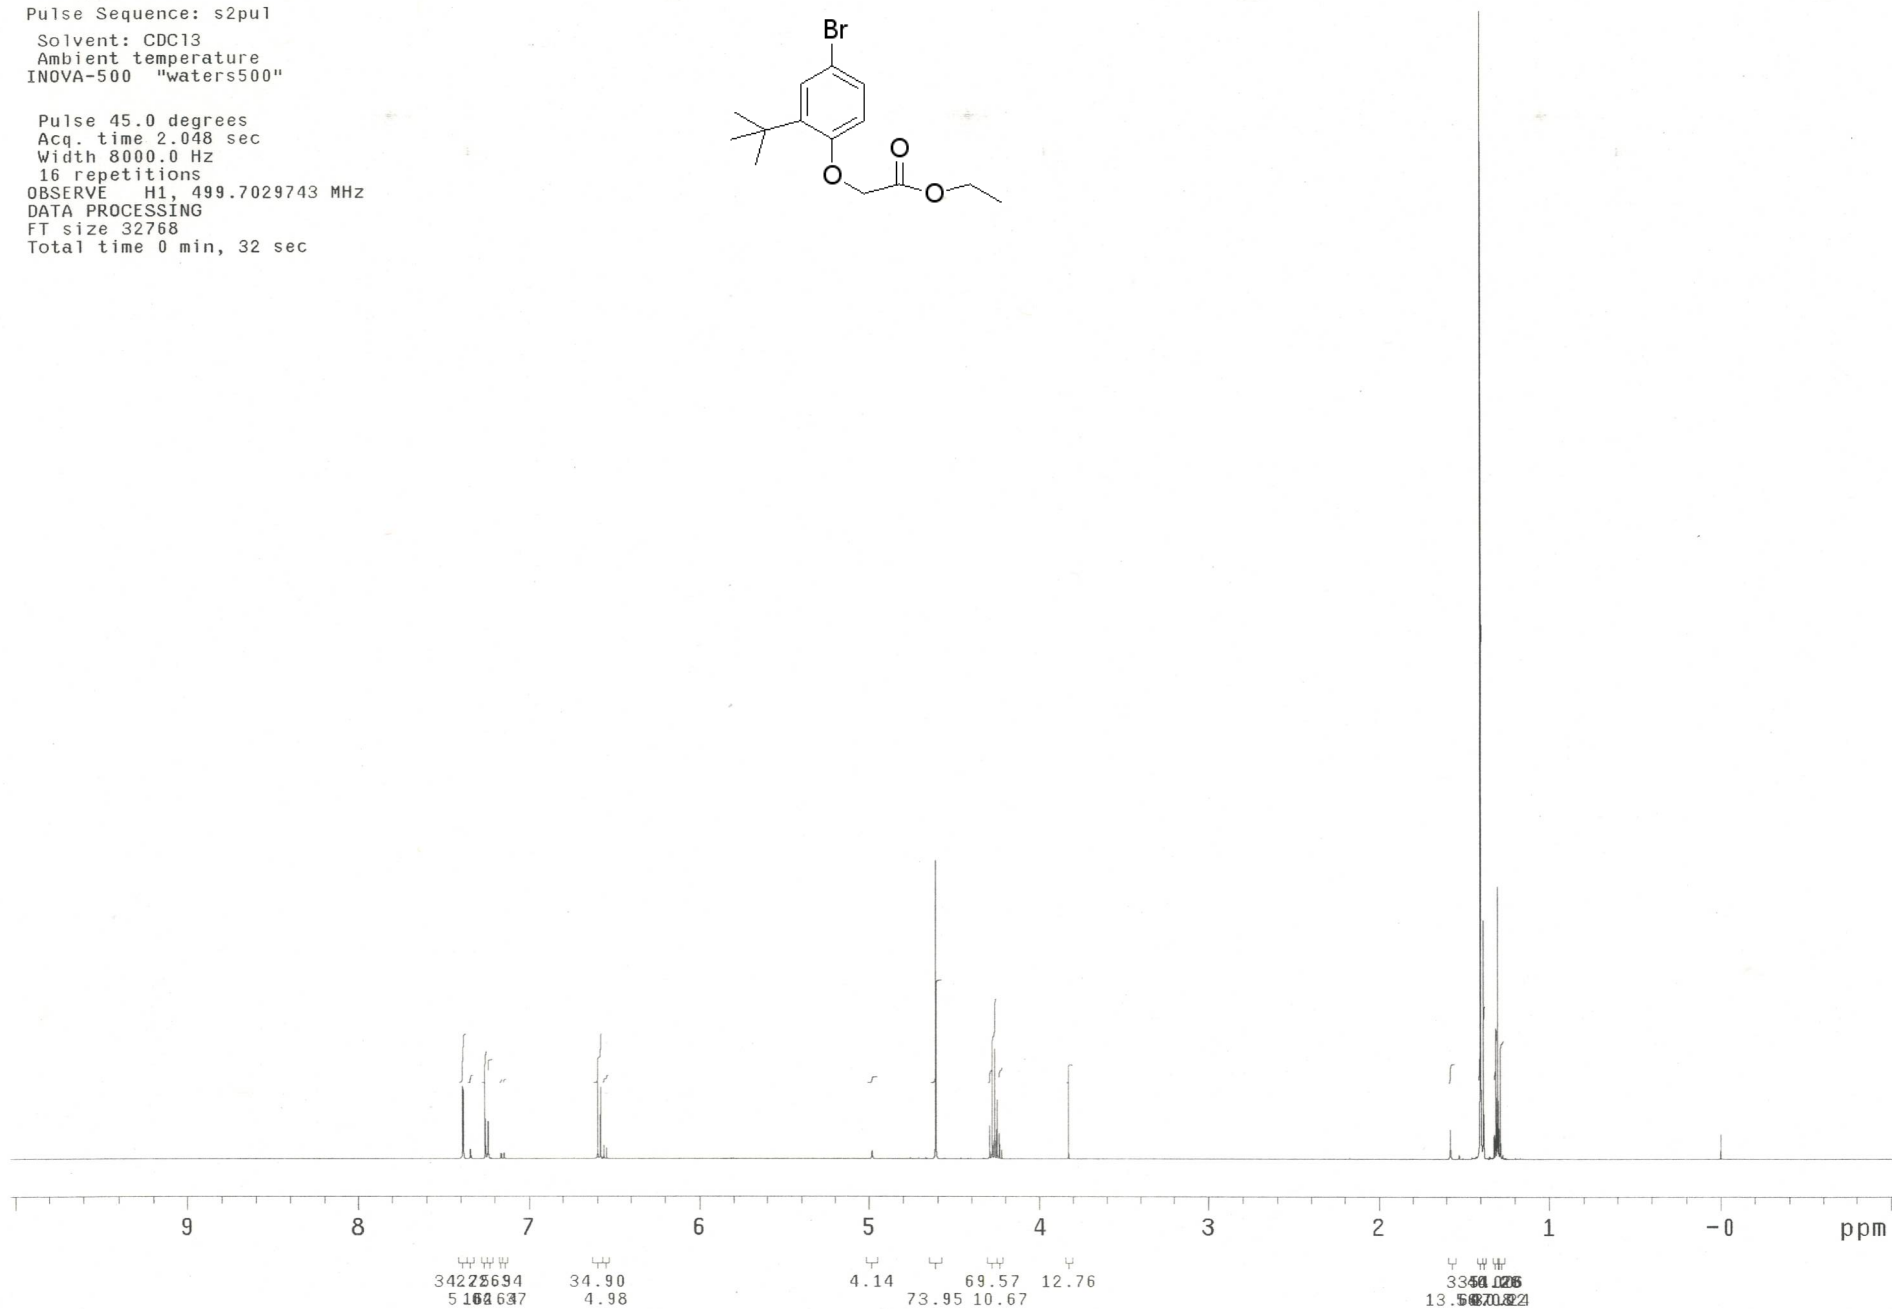

S25

STANDARD PROTON PARAMETERS

PW-1-39

Pulse Sequence: s2pu1

Solvent: CDC13

Ambient temperature

INOVA-500 "waters500"

Pulse 45.0 degrees

Acq. time 2.048 sec

Width 8000.0 Hz

16 repetitions

OBSERVE H1, 499.7029602 MHz

DATA PROCESSING

FT size 32768

Total time 0 min, 32 sec

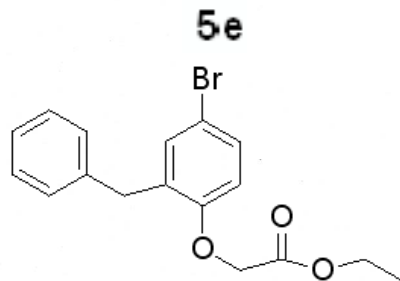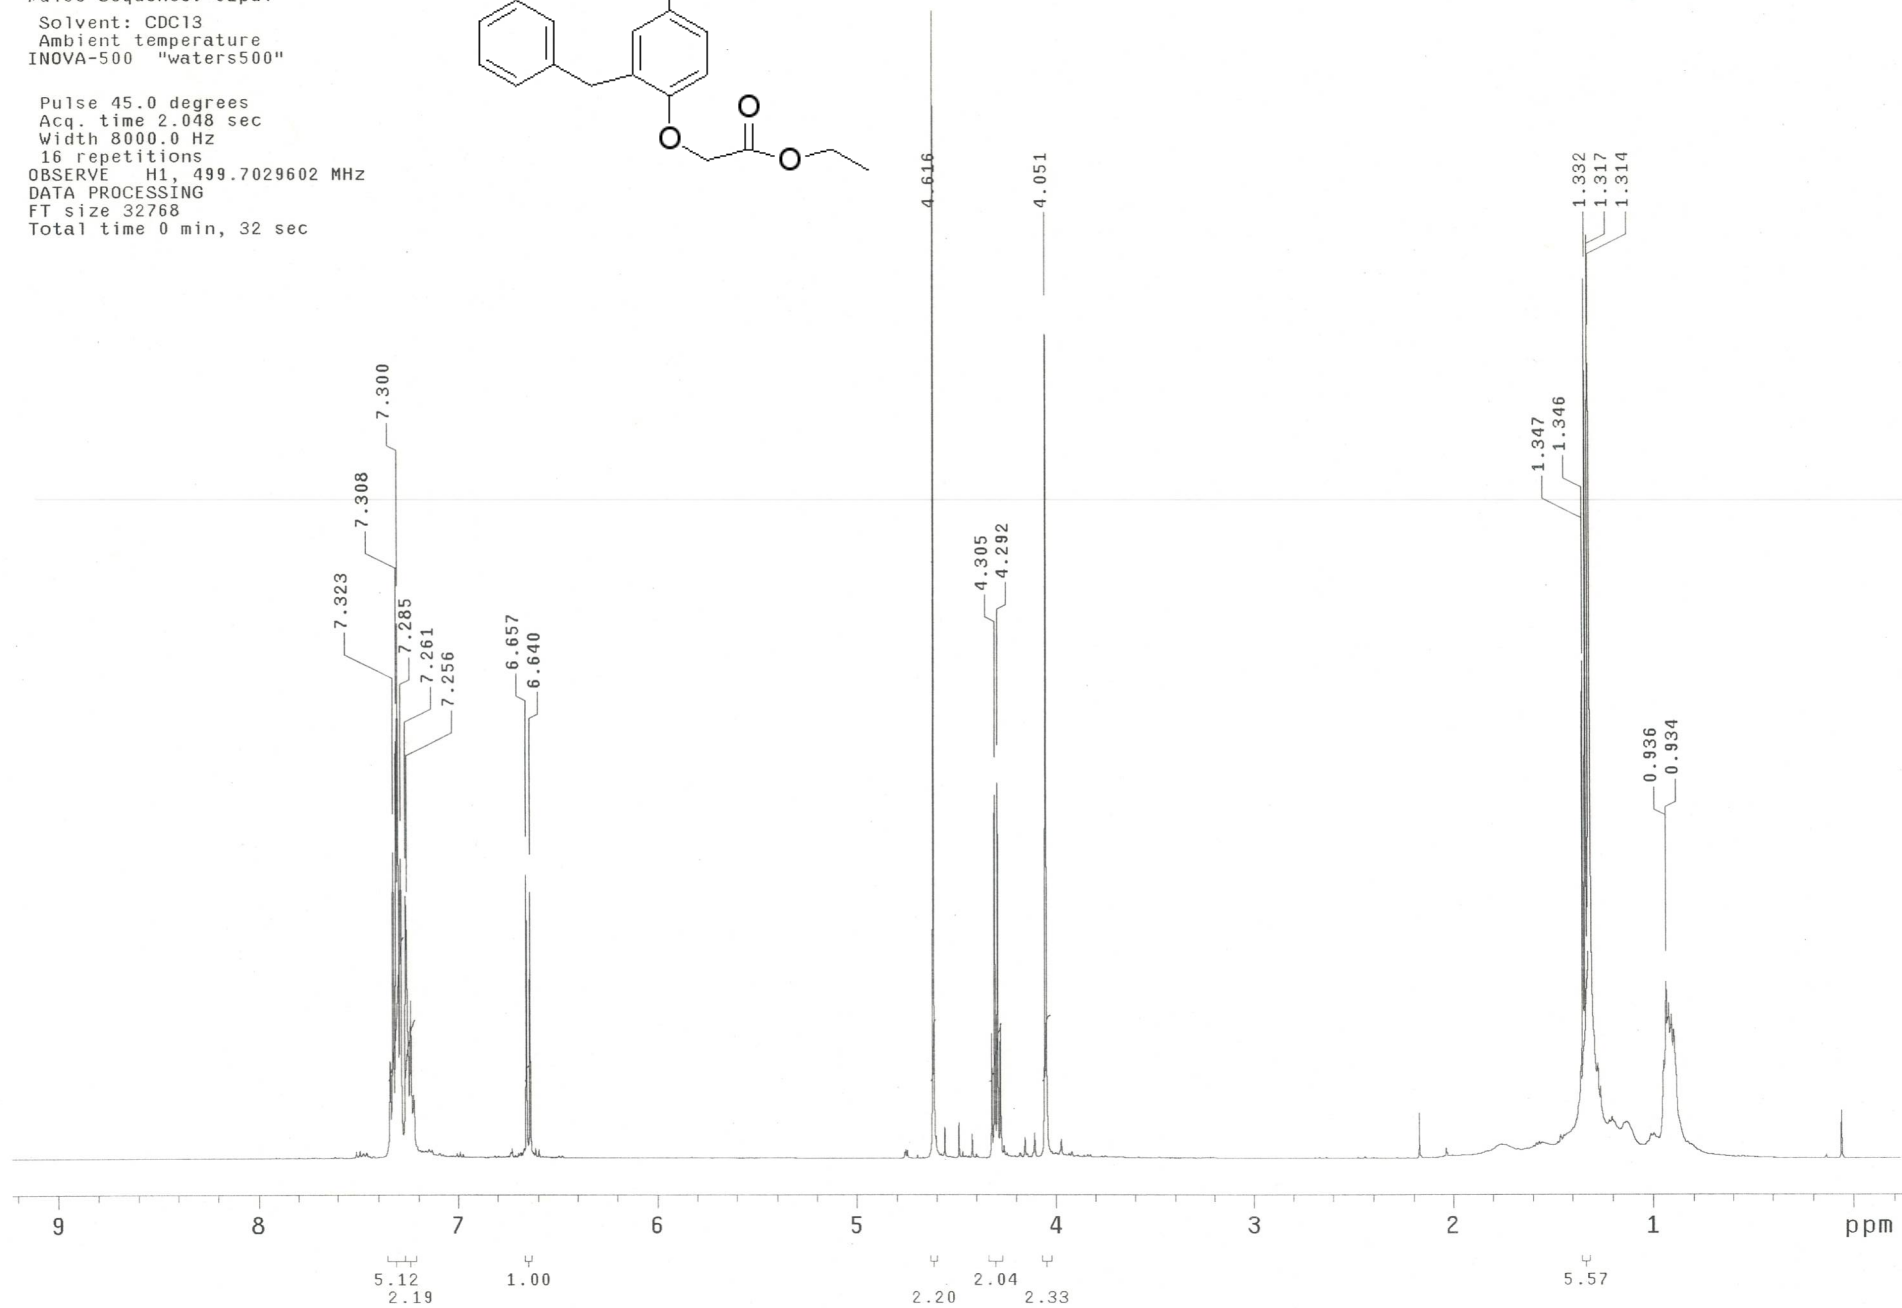

AW-III-84-62

STANDARD PROTON PARAMETERS

Pulse Sequence: s2pu1

Solvent: CDC13

Ambient temperature

INOVA-500 "waters500"

Pulse 45.0 degrees

Acq. time 2.048 sec

Width 8000.0 Hz

16 repetitions

OBSERVE H1, 499.7029727 MHz

DATA PROCESSING

FT size 32768

Total time 0 min, 32 sec

6a

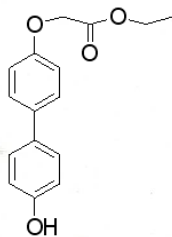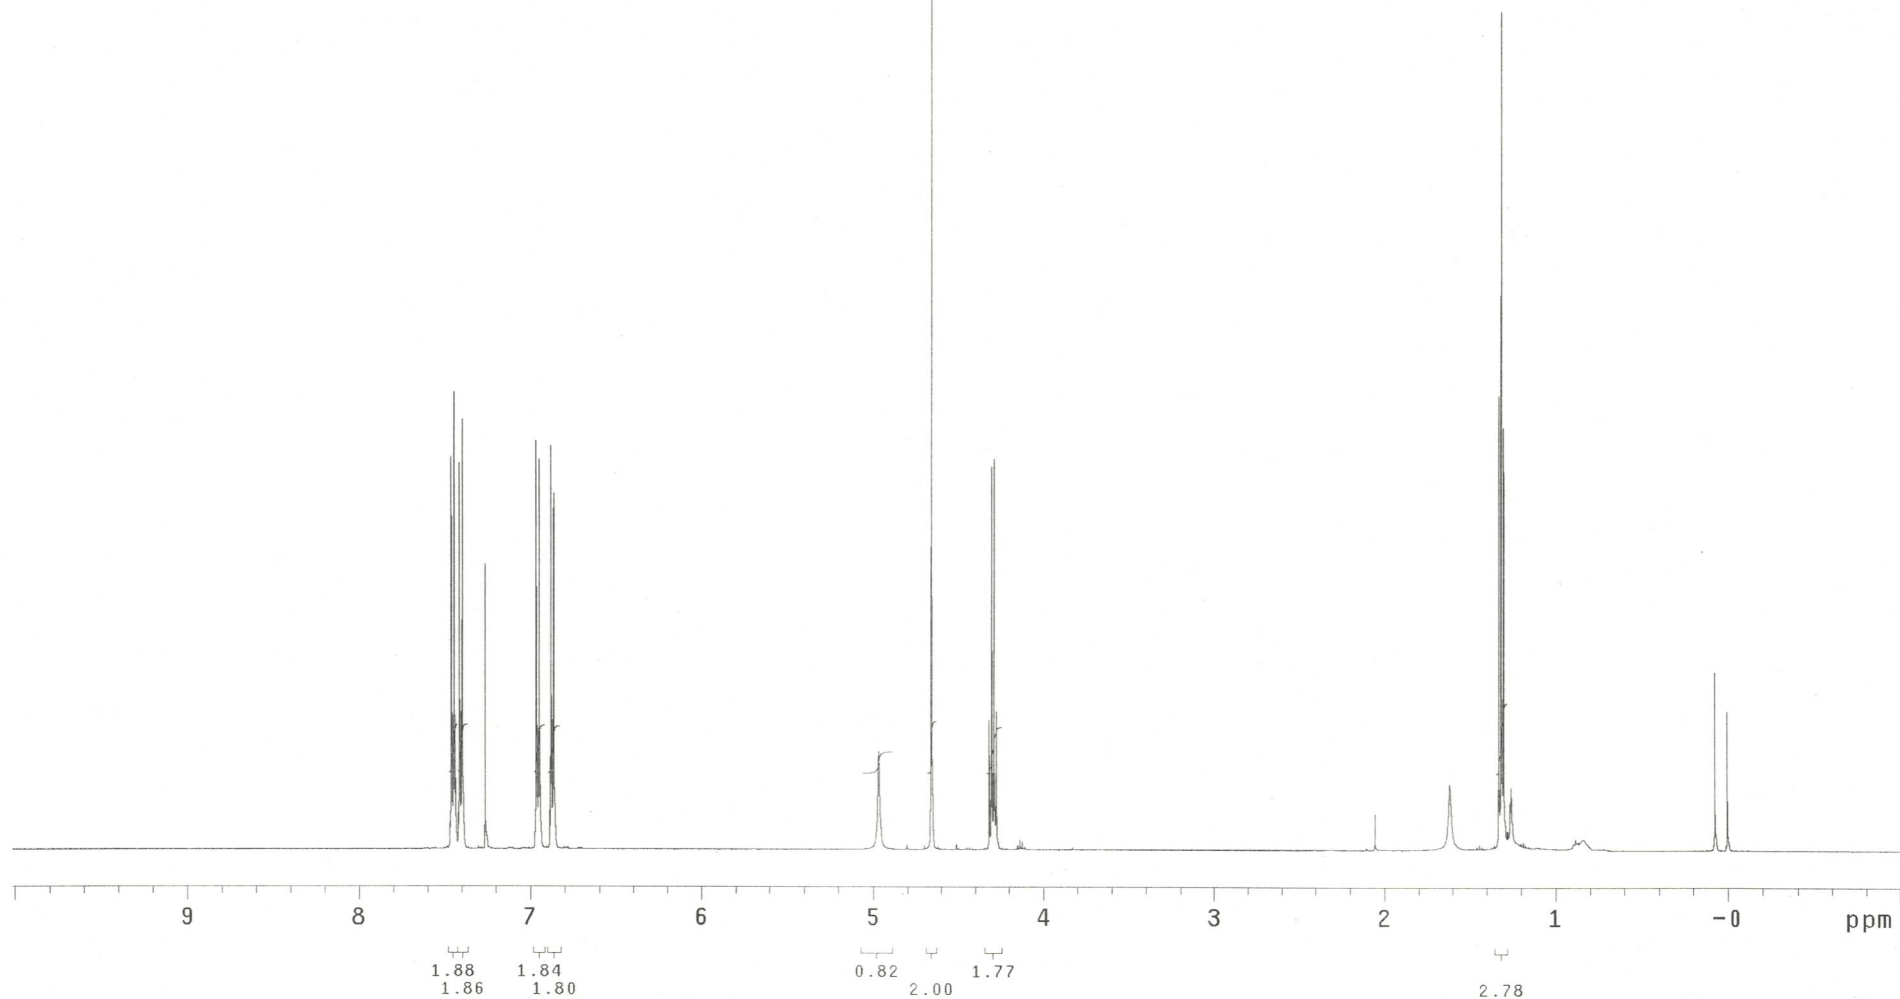

S27

PW-1-74

STANDARD PROTON PARAMETERS

Pulse Sequence: s2pu1

Solvent: CDCl3  
Ambient temperature  
INOVA-500 "waters500"

Pulse: 45.0 degrees  
Acq. time 2.018 sec  
Width 8000.0 Hz  
16 repetitions  
OBSERVE H1, 499.7127366 MHz  
DATA PROCESSING  
FT size 32768  
Total time 0 min, 32 sec

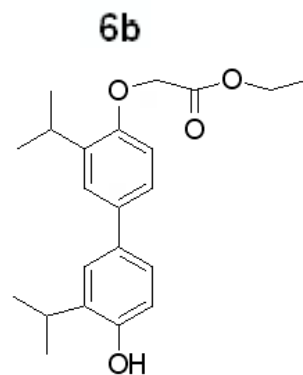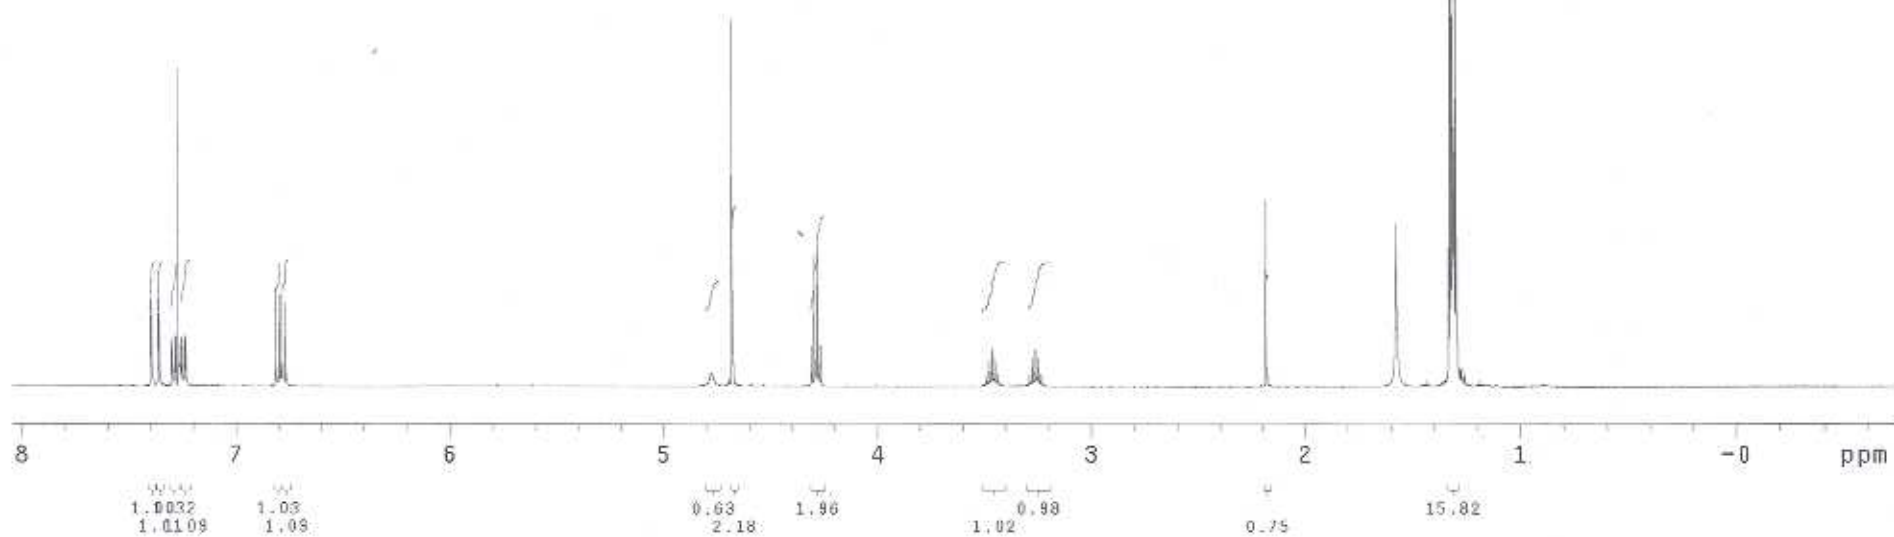

AW-III-7A-43b

STANDARD PROTON PARAMETERS

Pulse Sequence: s2pu1

Solvent: CDCl3

Ambient temperature

INOVA-500 "waters500"

Pulse 45.0 degrees

Acq. time 2.048 sec

Width 8000.0 Hz

64 repetitions

OBSERVE H1, 499.7127317 MHz

DATA PROCESSING

FT size 32768

Total time 2 min, 11 sec.

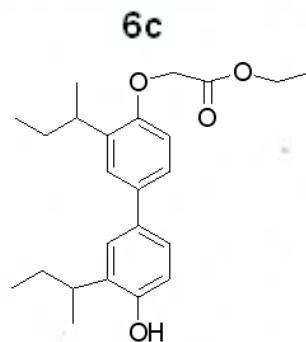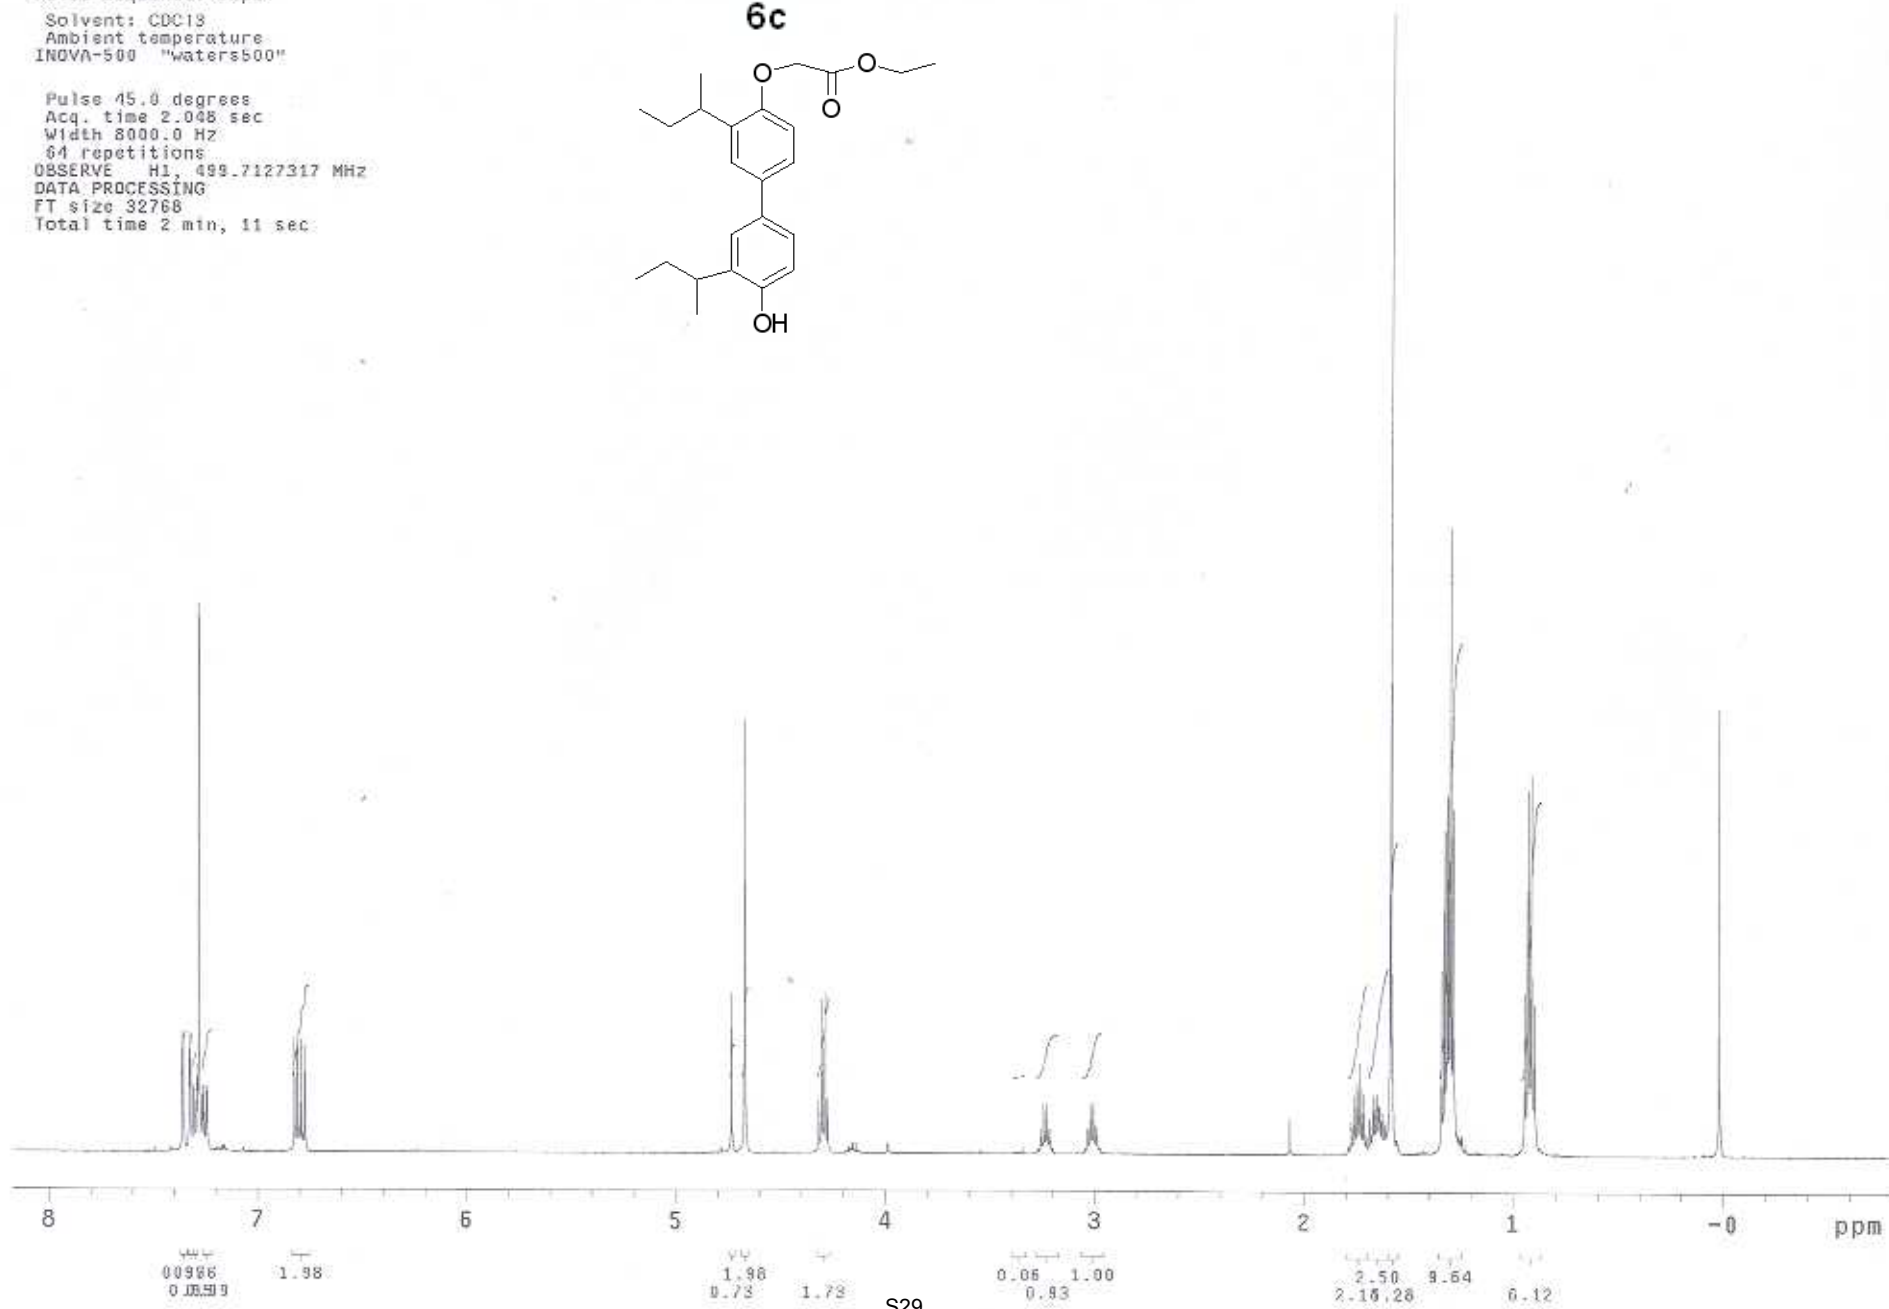

AW-III-73-34

Pulse Sequence: s2pu1

Solvent: CDCl3  
Ambient temperature  
INOVA-500 "waters500"

Pulse 45.0 degrees  
Acq. time 2.048 sec  
Width 8000.0 Hz  
16 repetitions  
OBSERVE H1, 499.7127366 MHz  
DATA PROCESSING  
FT size 32768  
Total time 0 min, 32 sec

6d

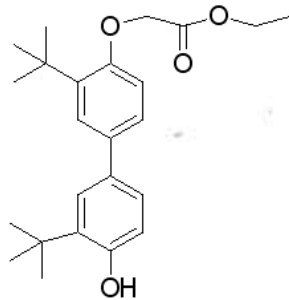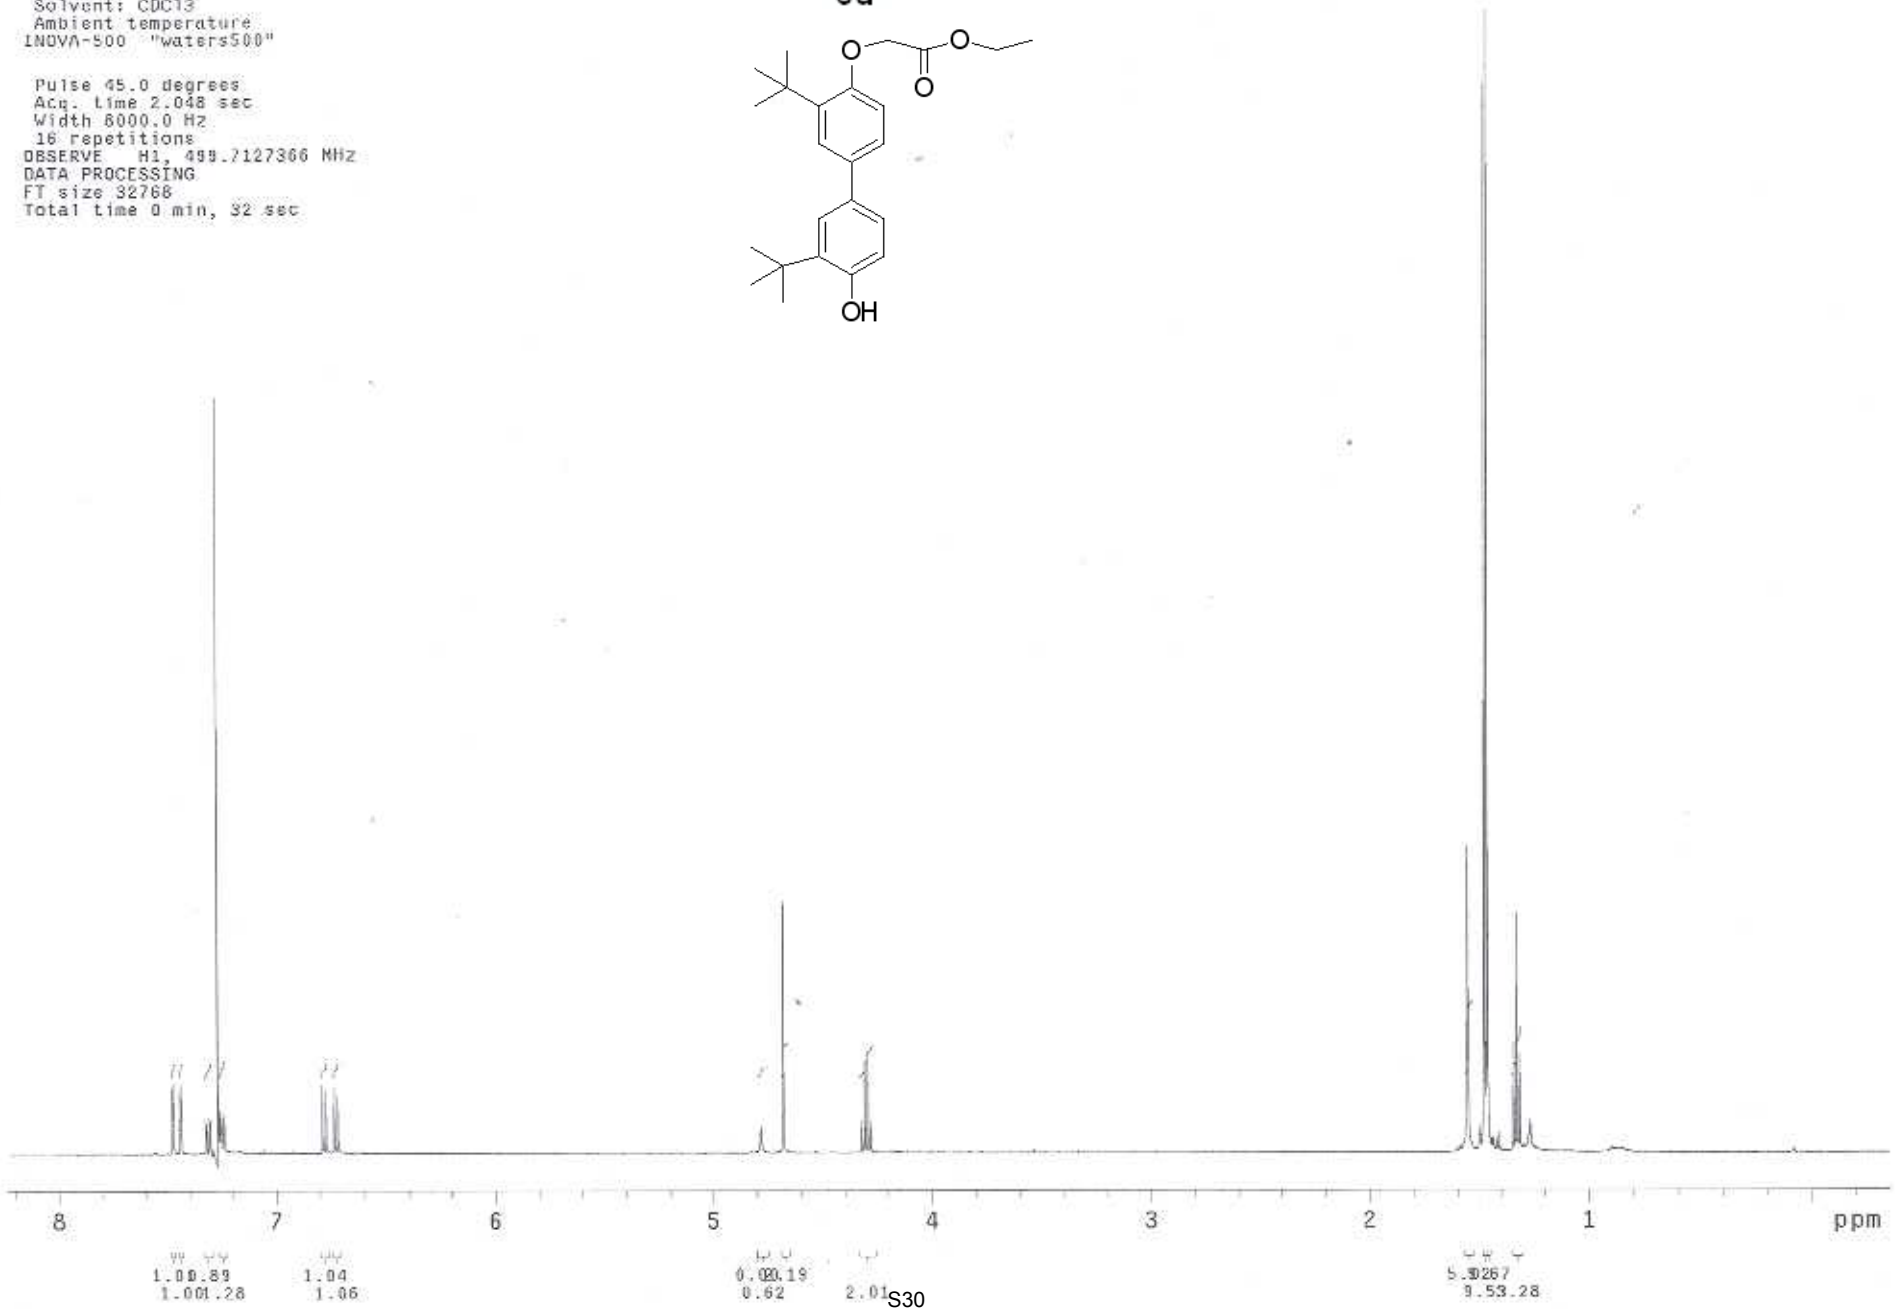

S30

STANDARD PROTON PARAMETERS

PW-1-77

Pulse Sequence: s2pu1

Solvent: CDC13

Ambient temperature

INOVA-500 "waters500"

Pulse 45.0 degrees

Acq. time 2.048 sec

Width 8000.0 Hz

16 repetitions

OBSERVE H1, 499.7029602 MHz

DATA PROCESSING

FT size 32768

Total time 0 min, 32 sec

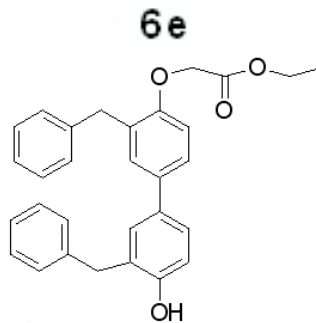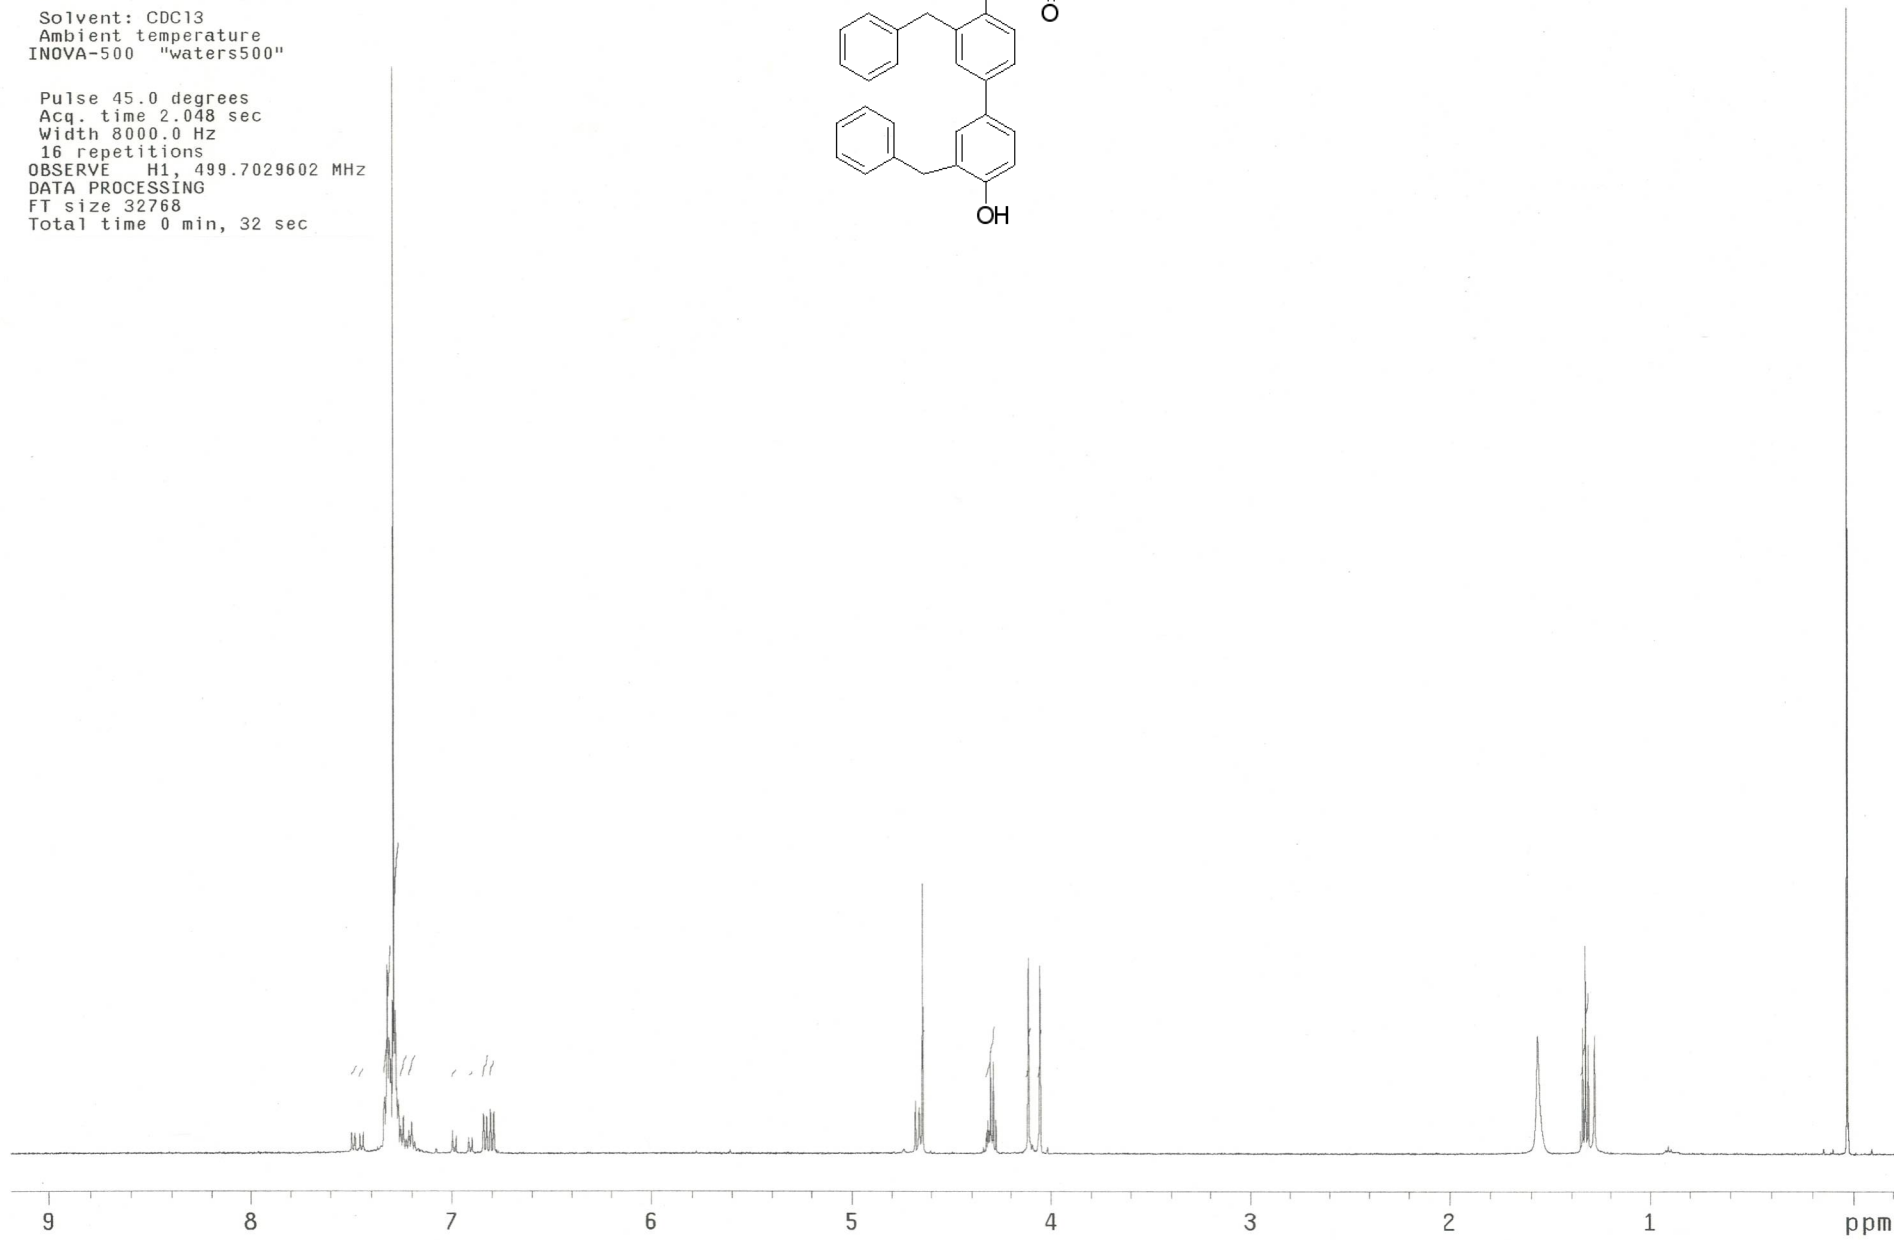

0.56 14.04 0.41 0.00  
0.48 1.68 0.30 0.00

2.12 2.25  
2.31 2.17

3.92

PW-I-82

STANDARD PROTON PARAMETERS

Pulse Sequence: s2pu1

Solvent: CDCl3

Ambient temperature

INOVA-500 "waters500"

Pulse 45.0 degrees

Acq. time 2.048 sec

Width 8000.0 Hz

16 repetitions

OBSERVE H1, 499.7029733 MHz

DATA PROCESSING

FT size 32768

Total time 0 min, 32 sec

7a

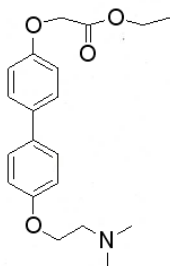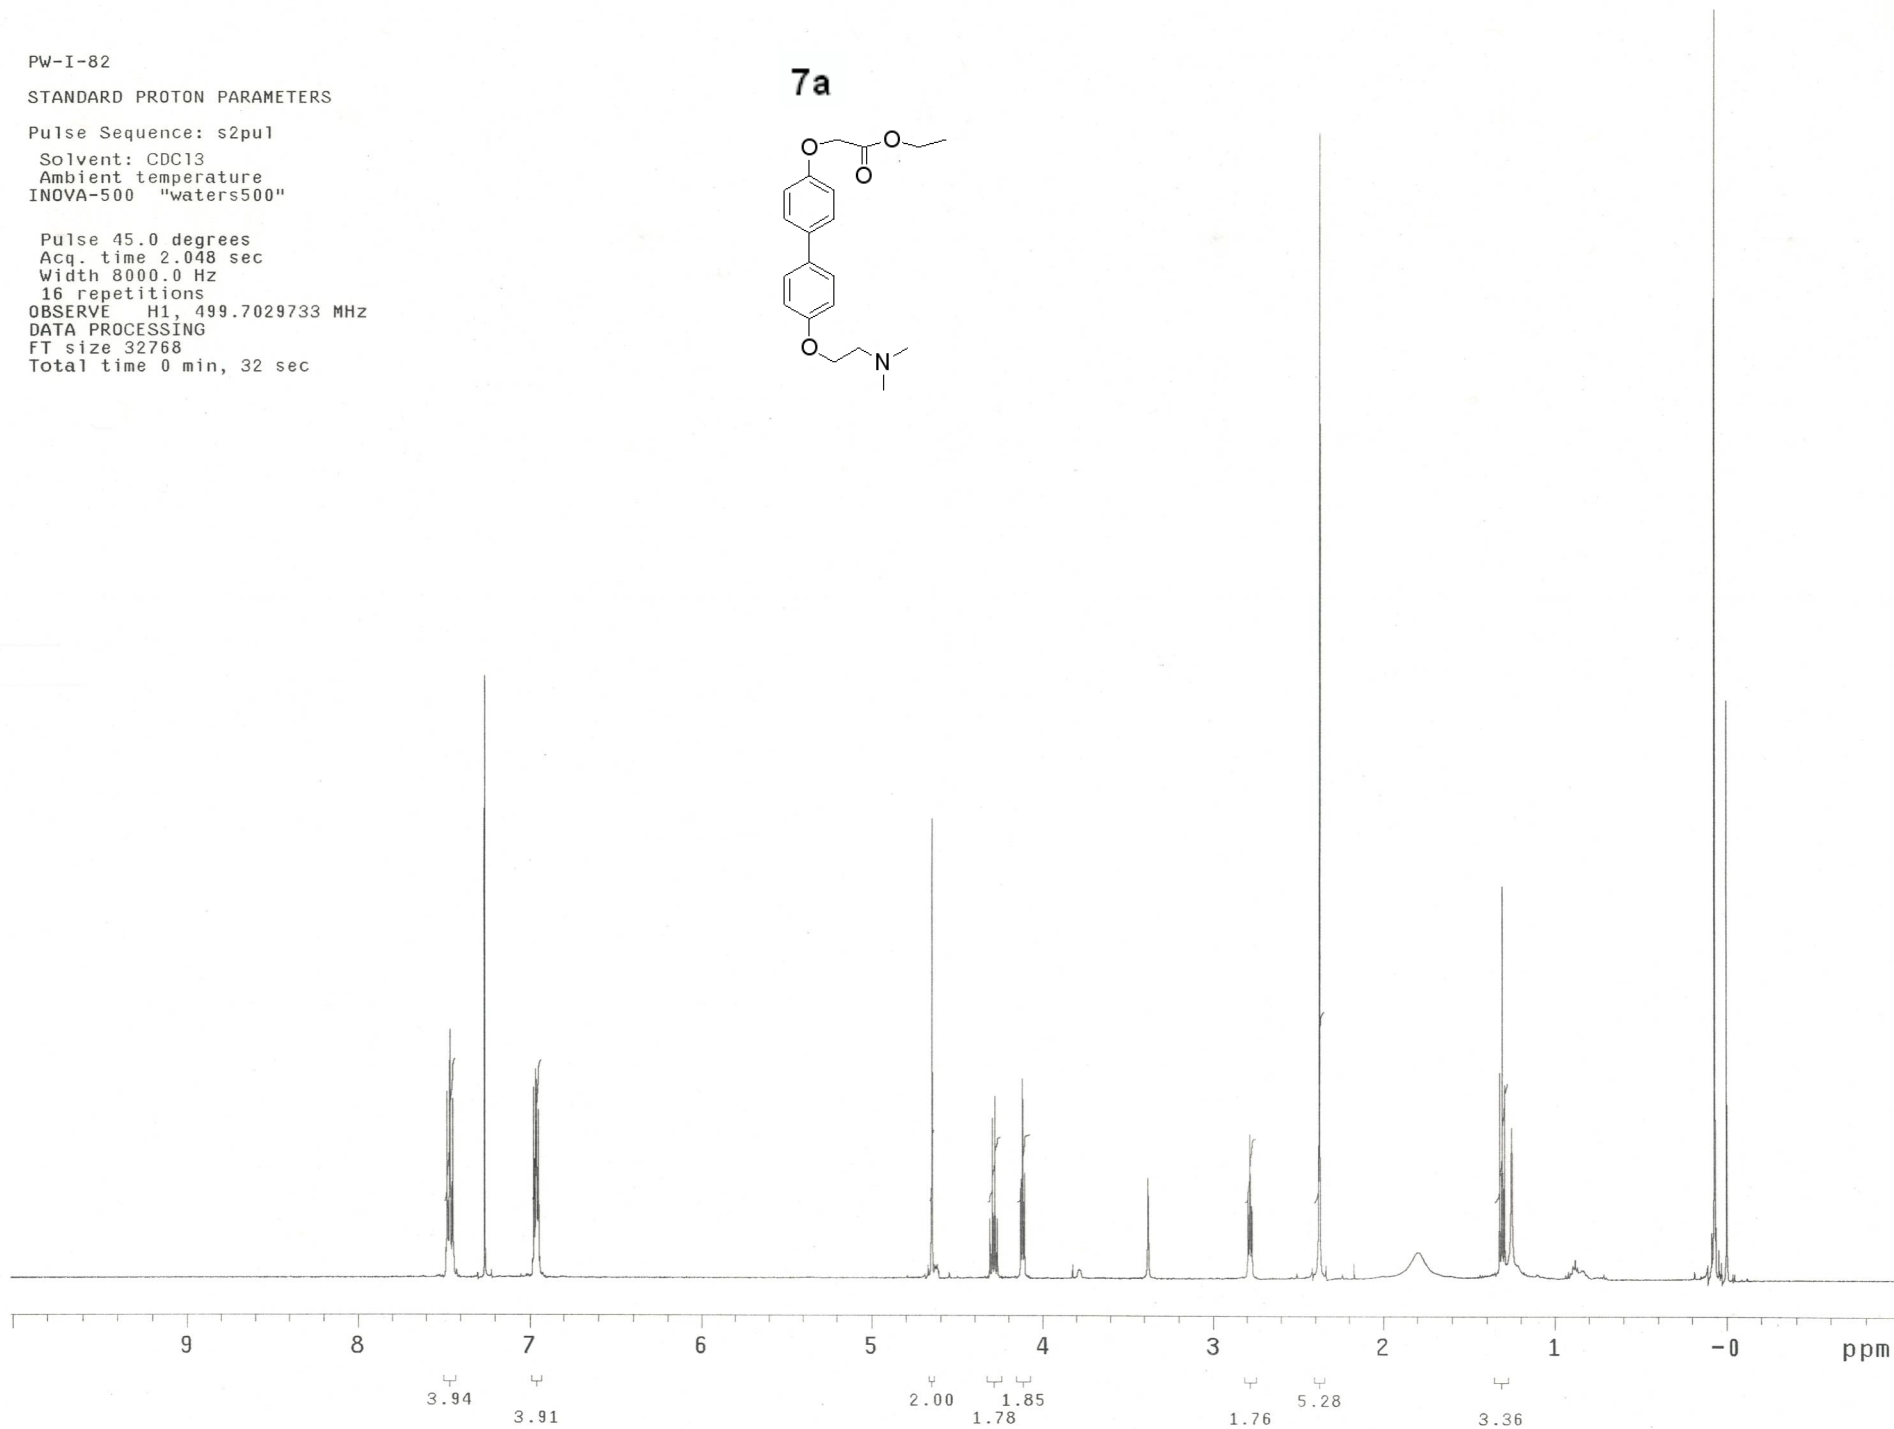

S32



PW-1-82\_C13

Weiser, Pat 8-20-09  
Waters500:hanson

Pulse Sequence: s2pu1

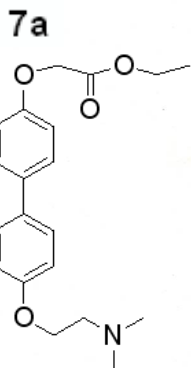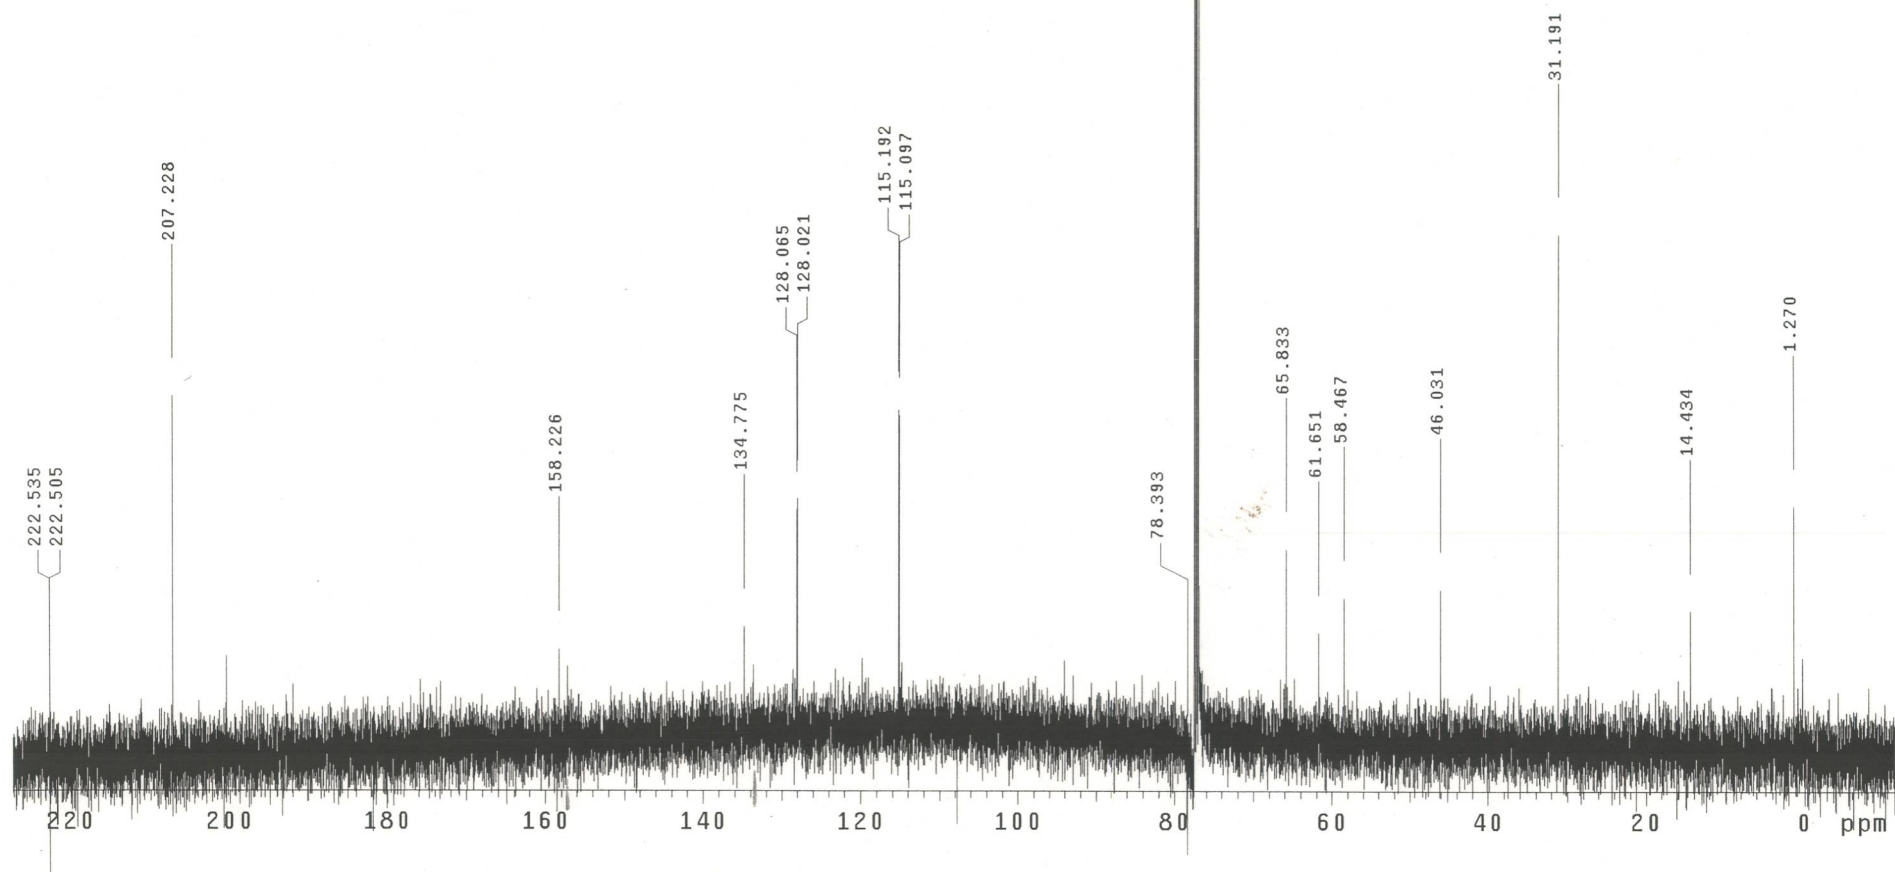

PW-1-76  
500 NMR

STANDARD PROTON PARAMETERS

Pulse Sequence: s2pu1

Solvent: CDCl3  
Ambient Temperature  
INOVA-500 "waters500"

Pulse 45.0 degrees  
Acq. time 2.048 sec  
Width 8000.0 Hz  
16 repetitions  
OBSERVE H1, 499.7127455 MHz  
DATA PROCESSING  
FT size 32768  
Total time 0 min, 32 sec

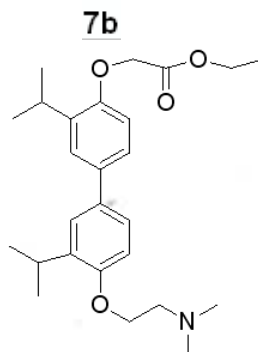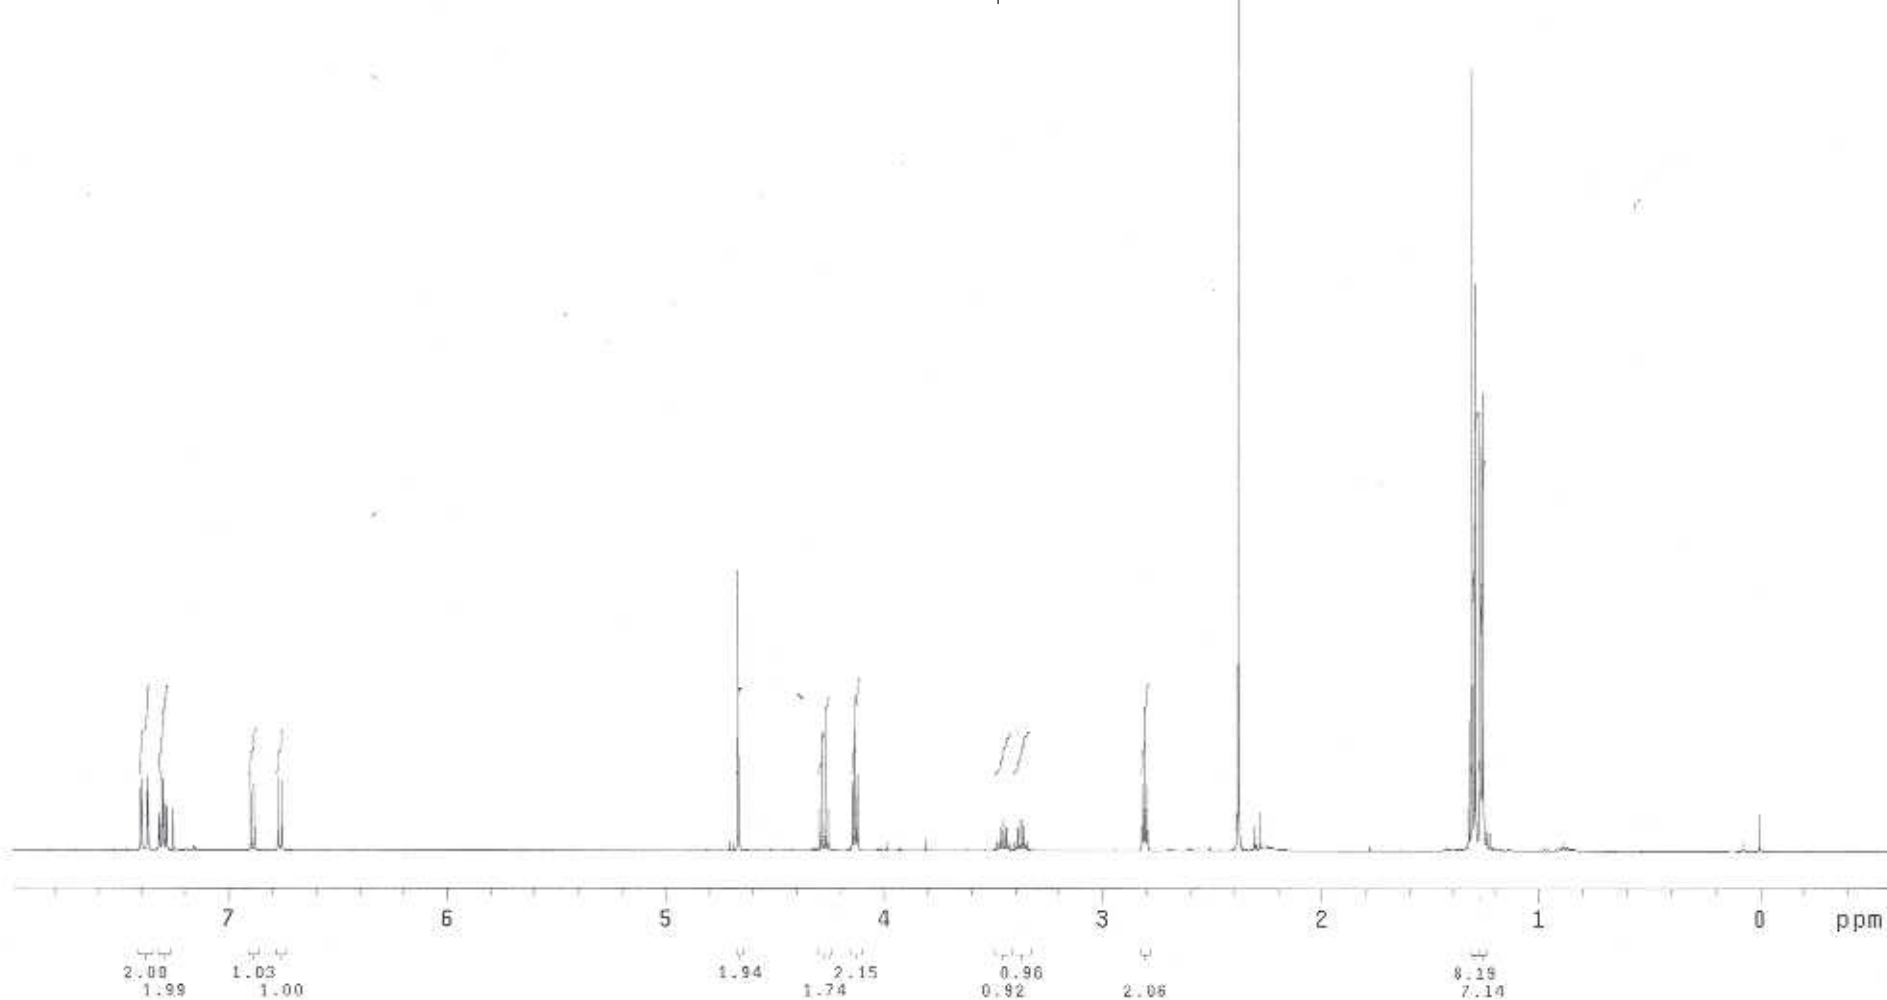

Pulse Sequence: s2pul

Solvent: CDCl3

Ambient temperature

File: PW-1-76-C13

Mercury-300 "nmr300"

PULSE SEQUENCE

Relax. delay 1.000 sec

Pulse 56.6 degrees

Acq. time 1.738 sec

Width 16867.8 Hz

4178 repetitions

OBSERVE C13, 75.4225835 MHz

DECOUPLE H1, 299.9511364 MHz

Power 39 dB

continuously on

WALTZ-16 modulated

DATA PROCESSING

Line broadening 1.0 Hz

FT size 131072

Total Time 40 hr, 12 min, 45 sec

7b

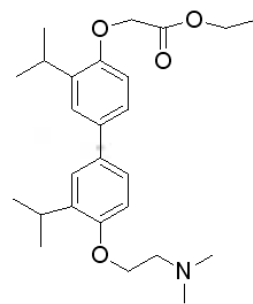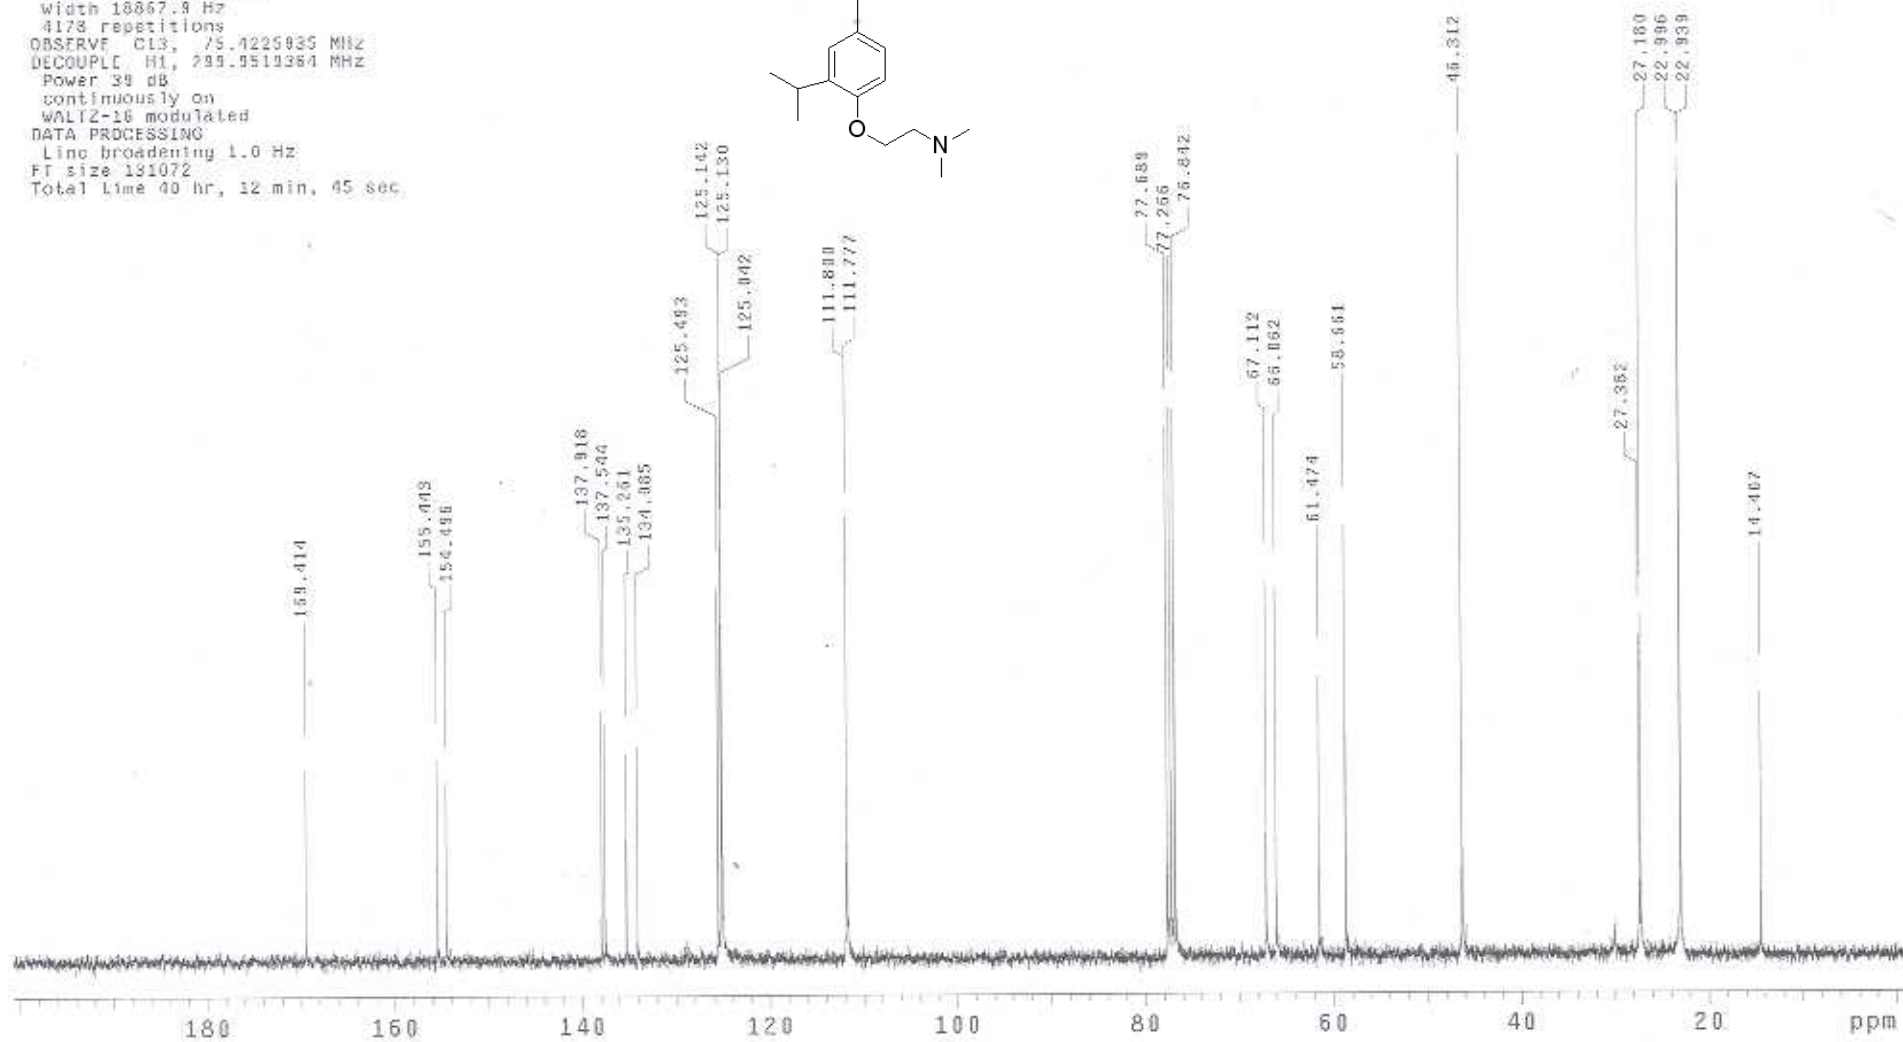

Pulse Sequence: s2pu1  
Solvent: CDC13  
Ambient temperature  
INOVA-500 "waters500"

Pulse 45.0 degrees  
Acq. time 2.048 sec  
Width 8000.0 Hz  
16 repetitions  
OBSERVE H1, 499.7127440 MHz  
DATA PROCESSING  
FT size 32768  
Total time 0 min, 32 sec

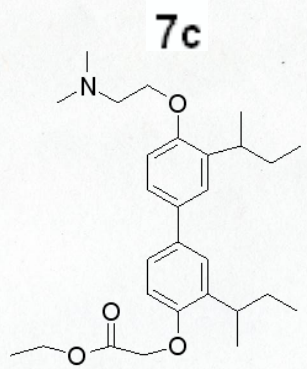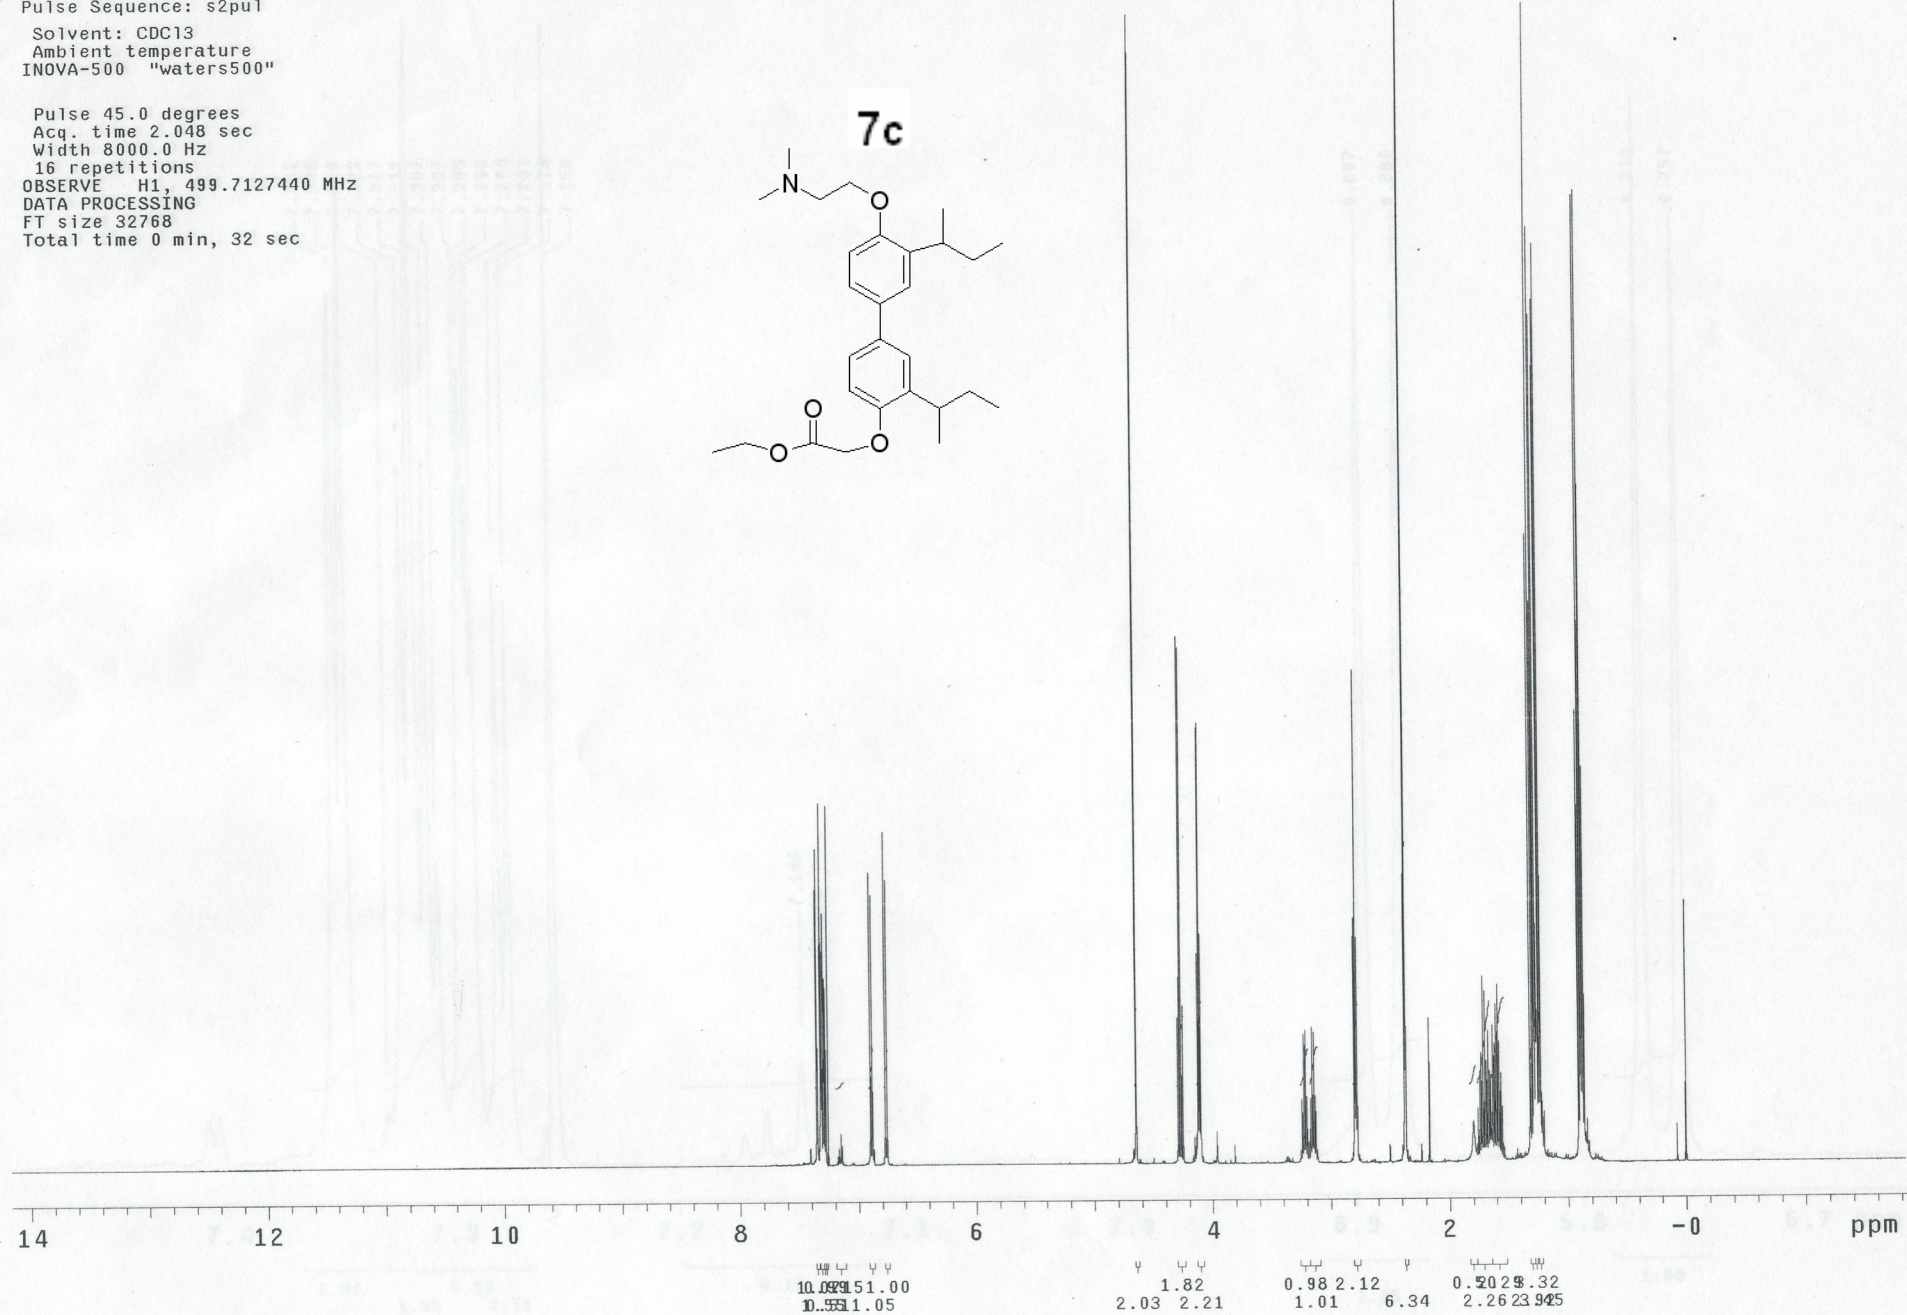

C13 AW-III-79-44a

sec-butyl product

Pulse Sequence: s2pu1

Solvent: CDC13  
Ambient temperature  
Mercury-300 "nmr300"

PULSE SEQUENCE

Relax. delay 1.000 sec  
Pulse 56.6 degrees  
Acq. time 1.738 sec  
Width 18867.9 Hz  
19524 repetitions

OBSERVE C13, 75.4225938 MHz

DECOUPLE H1, 299.9519364 MHz

Power 39 dB  
continuously on  
WALTZ-16 modulated

DATA PROCESSING

Line broadening 1.0 Hz

FT size 131072

Total time 40 hr, 12 min, 45 sec

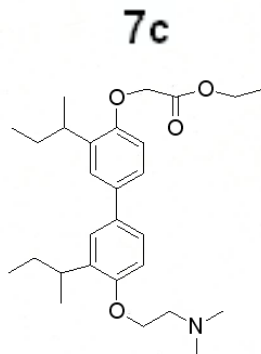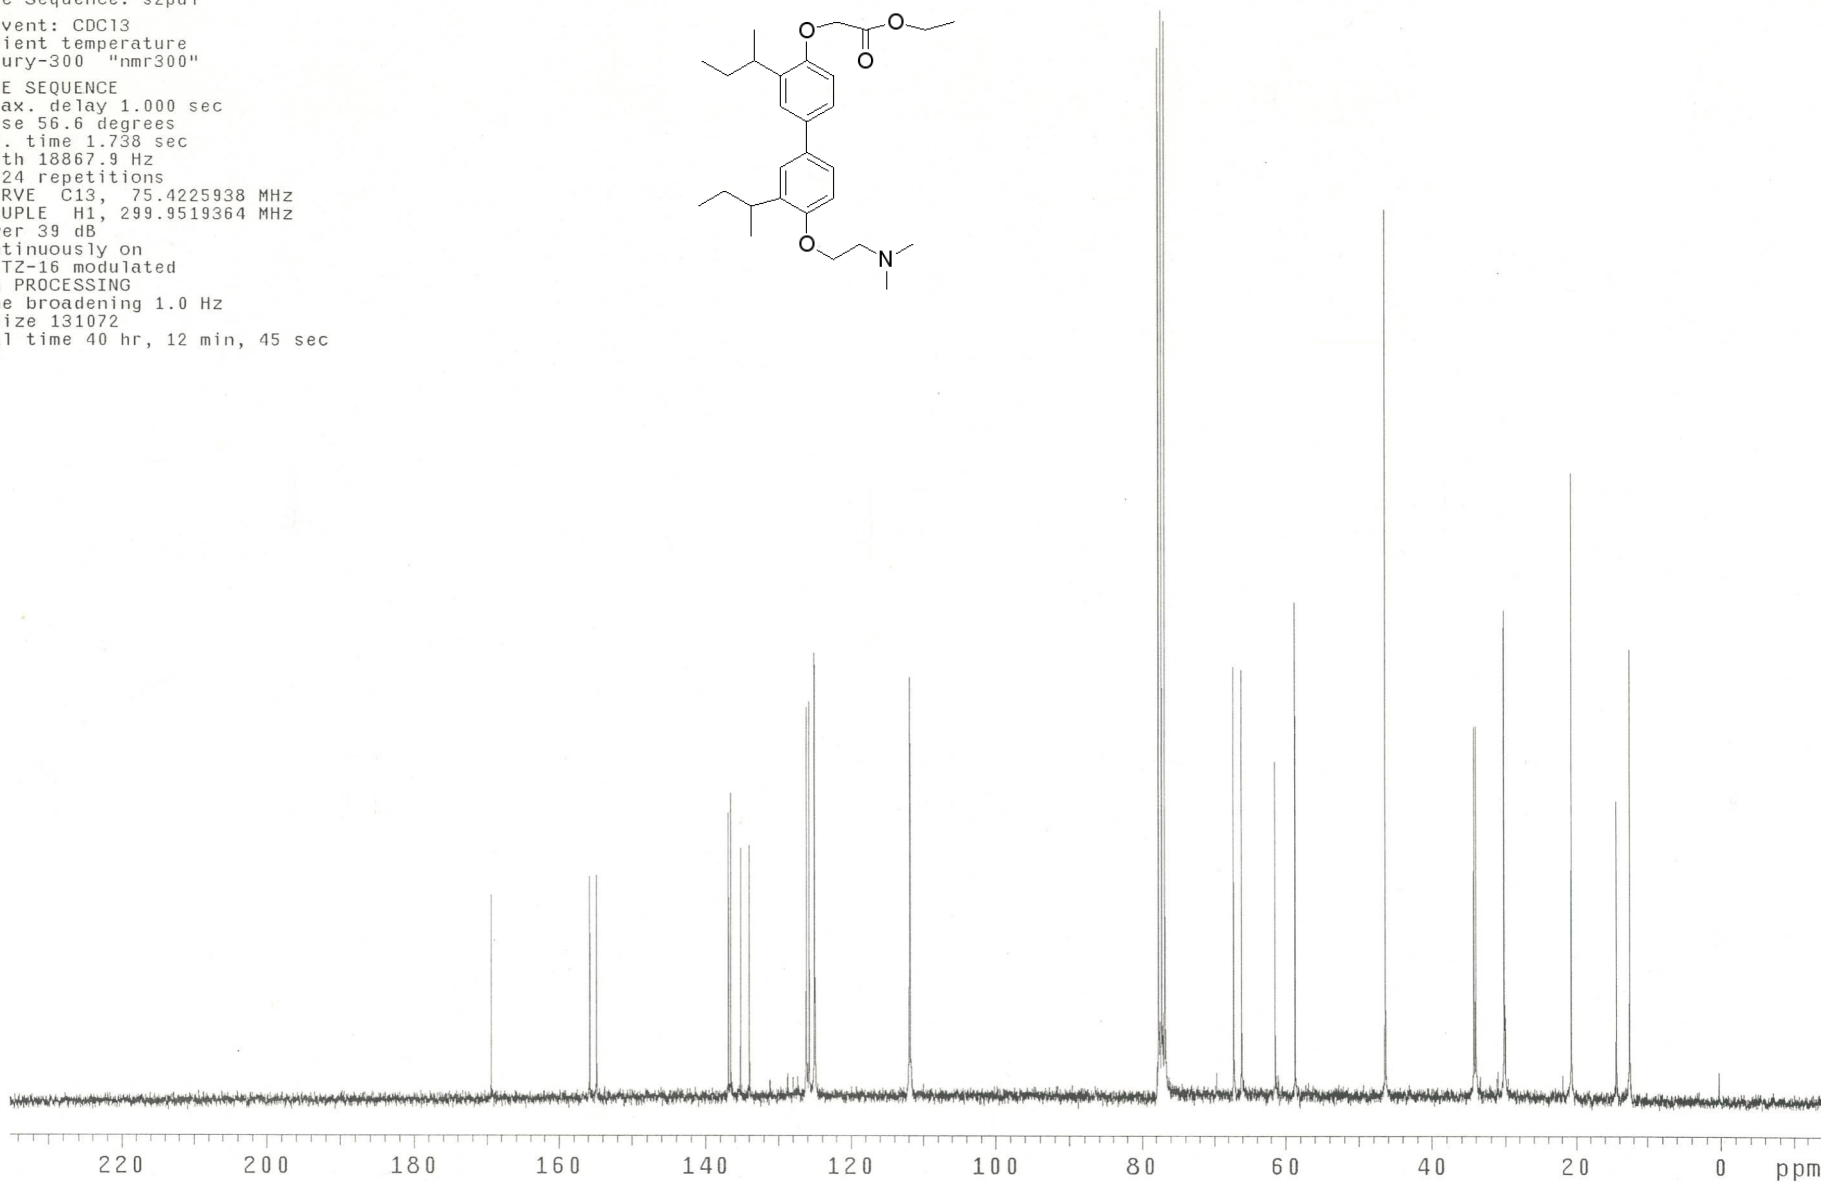

AW-111-77-41-post0A  
500 NMR

STANDARD PROTON PARAMETERS

Pulse Sequence: s2pu1

Solvent: CDCl3  
Ambient temperature  
INOVA-500 "waters500"

Pulse 45.0 degrees  
Acq. time 2.048 sec  
Width 8000.0 Hz  
2 repetitions  
OBSERVE H1, 499.7127426 MHz  
DATA PROCESSING  
FT size 32768  
Total time 0 min, 4 sec

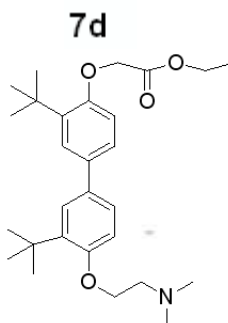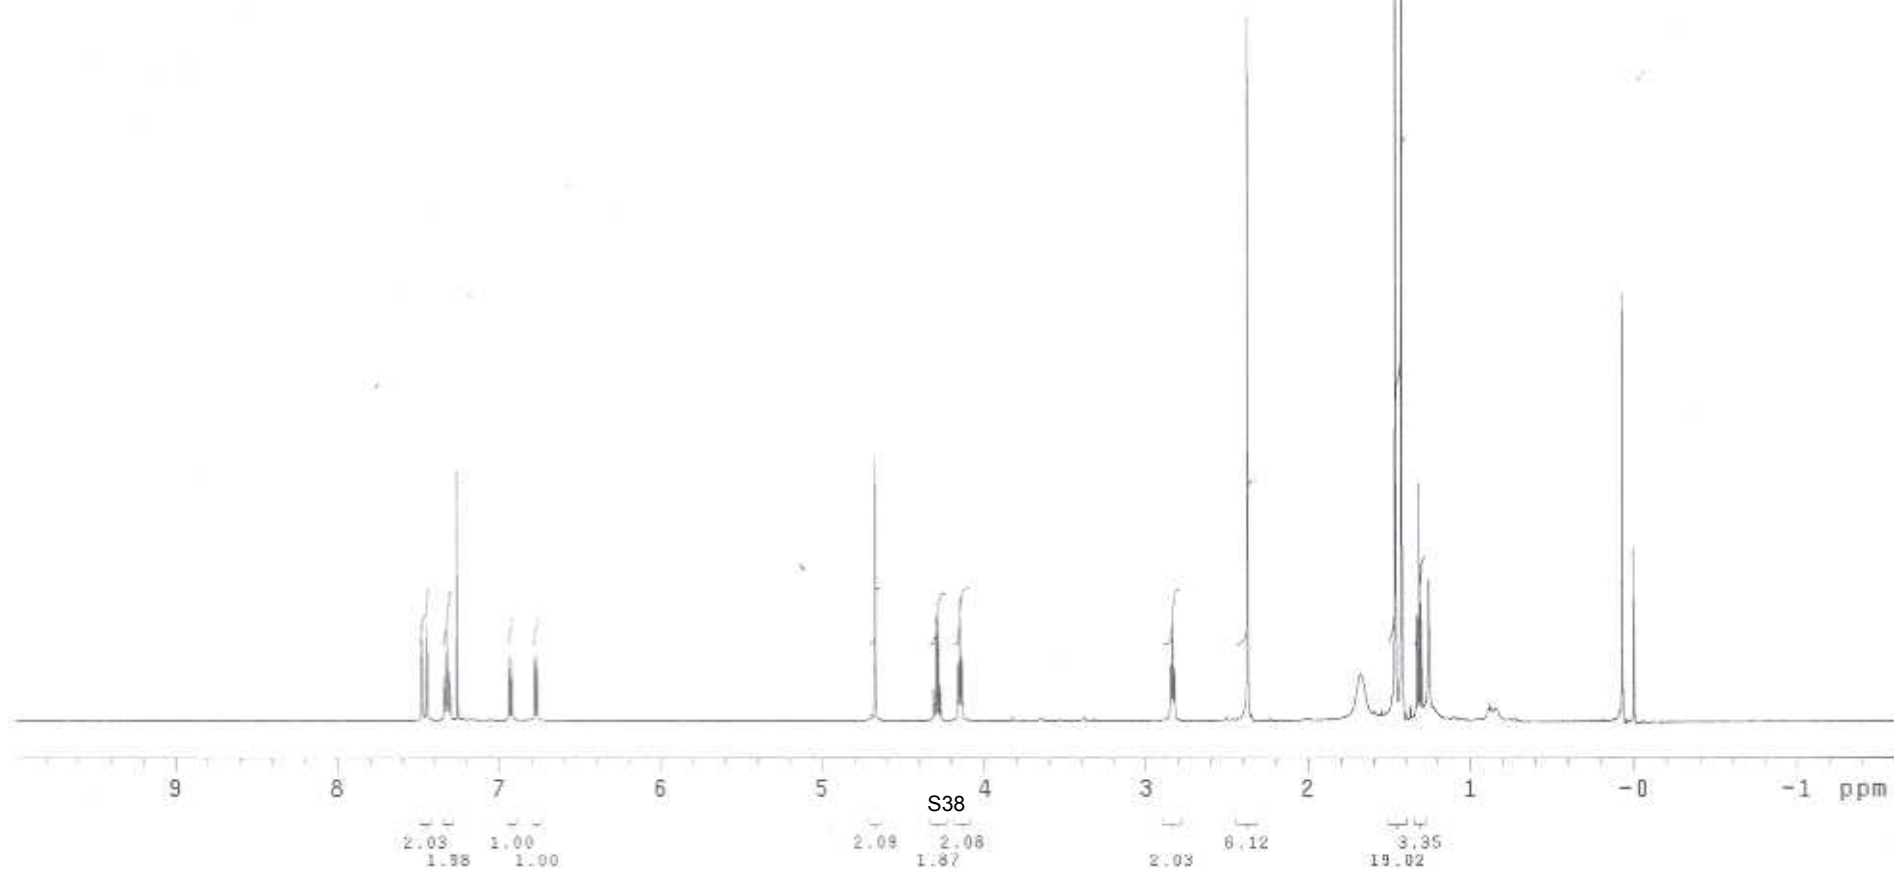

NW-111-77-41-purified-Cl3

Cl3

Pulse Sequence: sXpu1

Solvent: CDCl3

Ambient Temperature

File: NW-111-77-110010A-Cl3

Mercury-300 "var200"

PULS AC SEQUENCE

Relax. delay 1.000 sec

Pulse 56.5 degrees

Acq. time 1.200 sec

Width 18667.9 Hz

17257 repetitions

URGENT Cl3, 75.4235477 MHz

DECOUPLE H1, 201.5514254 MHz

Power 38 dB

continuously on

WALTZ-16 modulated

DATA PROCESSING

Line broadening 1.0 Hz

F1 size 121677

Total time 48 hr, 12 min, 45 sec

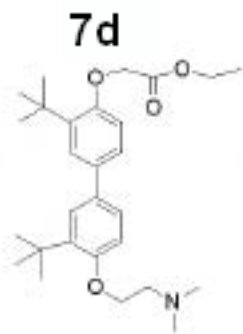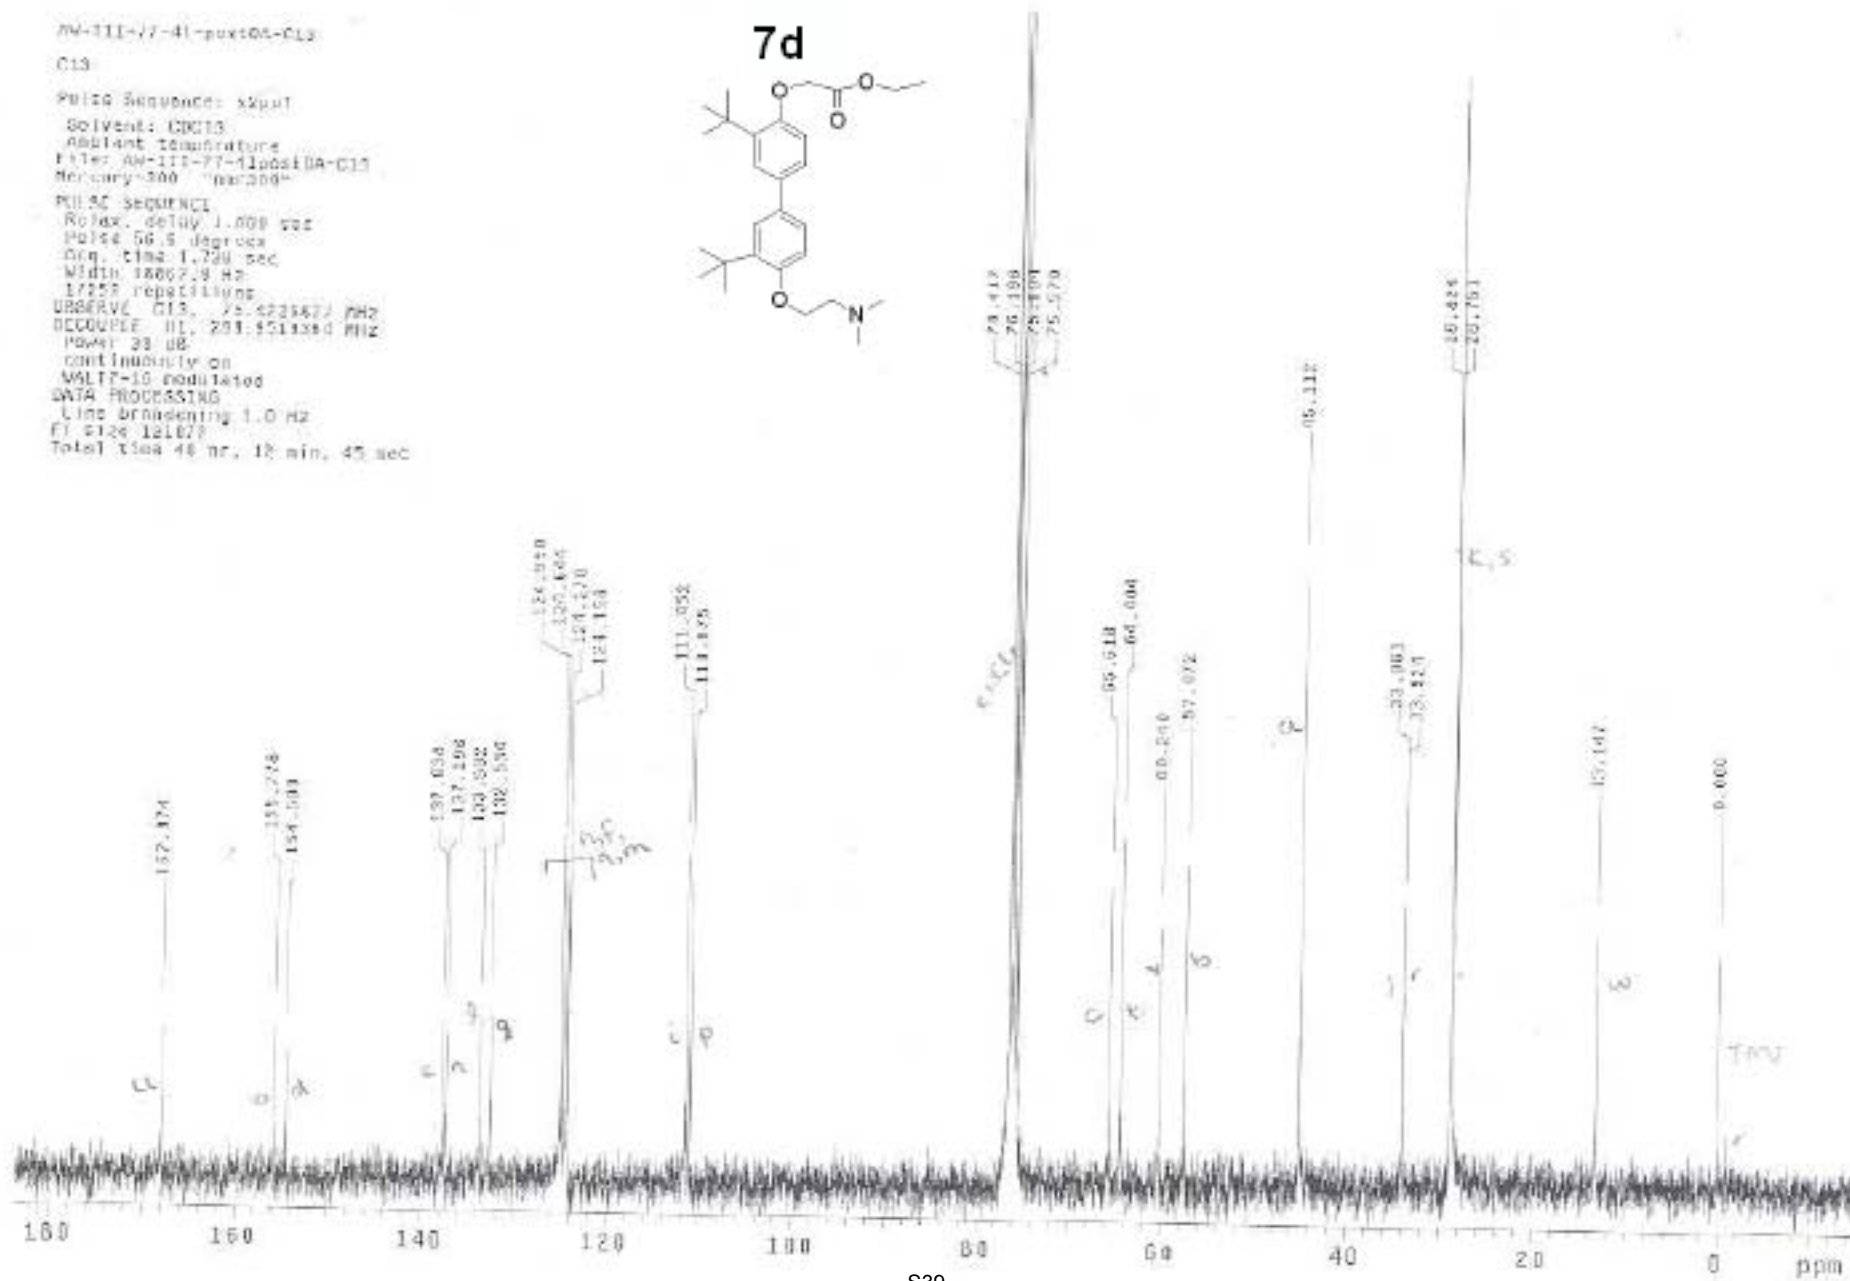

PW-1-89  
500 NMR

STANDARD PROTON PARAMETERS

Pulse Sequence: s2pul

Solvent: CDCl3  
Ambient temperature  
INNOVA-500 "waters500"

Pulse 45.0 degrees  
Acq. time 2.048 sec  
Width 8000.0 Hz  
16 repetitions  
OBSERVE H1 499.7127421 MHz  
DATA PROCESSING  
FT size 32768  
Total time 0 min, 32 sec

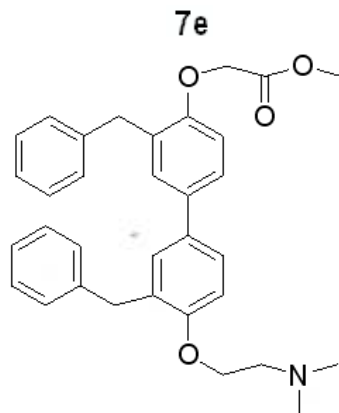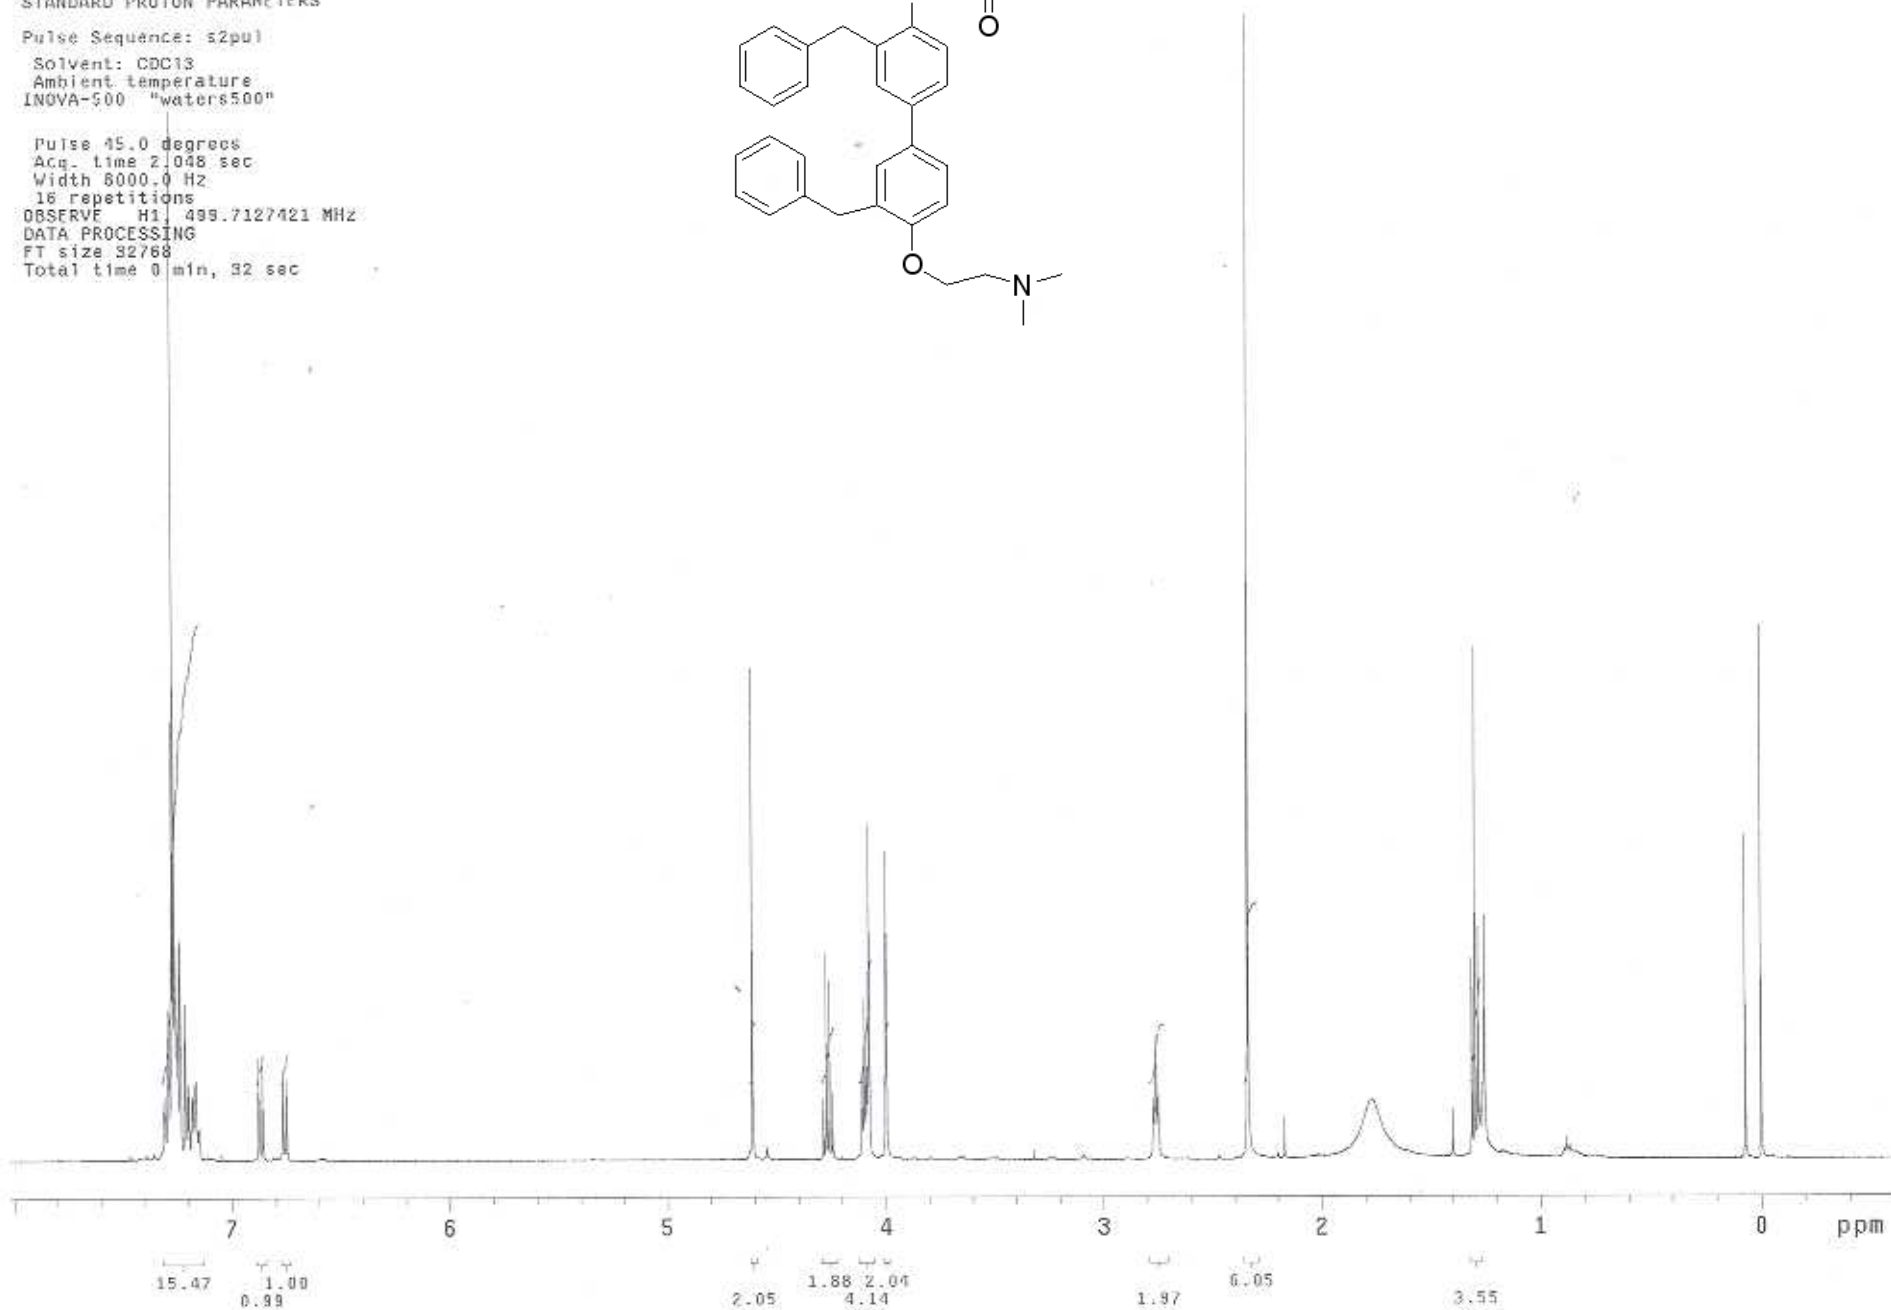

S40



PW-1-78\_C13\_2

Pulse Sequence: s2pu1

Solvent: CDC13

Ambient temperature

Mercury-300 "nmr300"

PULSE SEQUENCE

Relax. delay 1.000 sec

Pulse 56.6 degrees

Acq. time 1.738 sec

Width 18867.9 Hz

21104 repetitions

OBSERVE C13, 75.4225938 MHz

DECOUPLE H1, 299.9519364 MHz

Power 39 dB

continuously on

WALTZ-16 modulated

DATA PROCESSING

Line broadening 1.0 Hz

FT size 131072

Total time 31 hr, 39 min, 0 sec

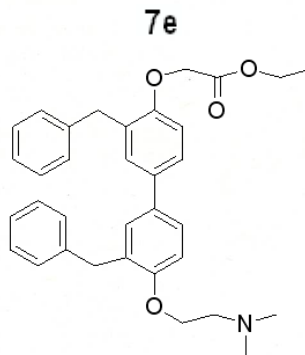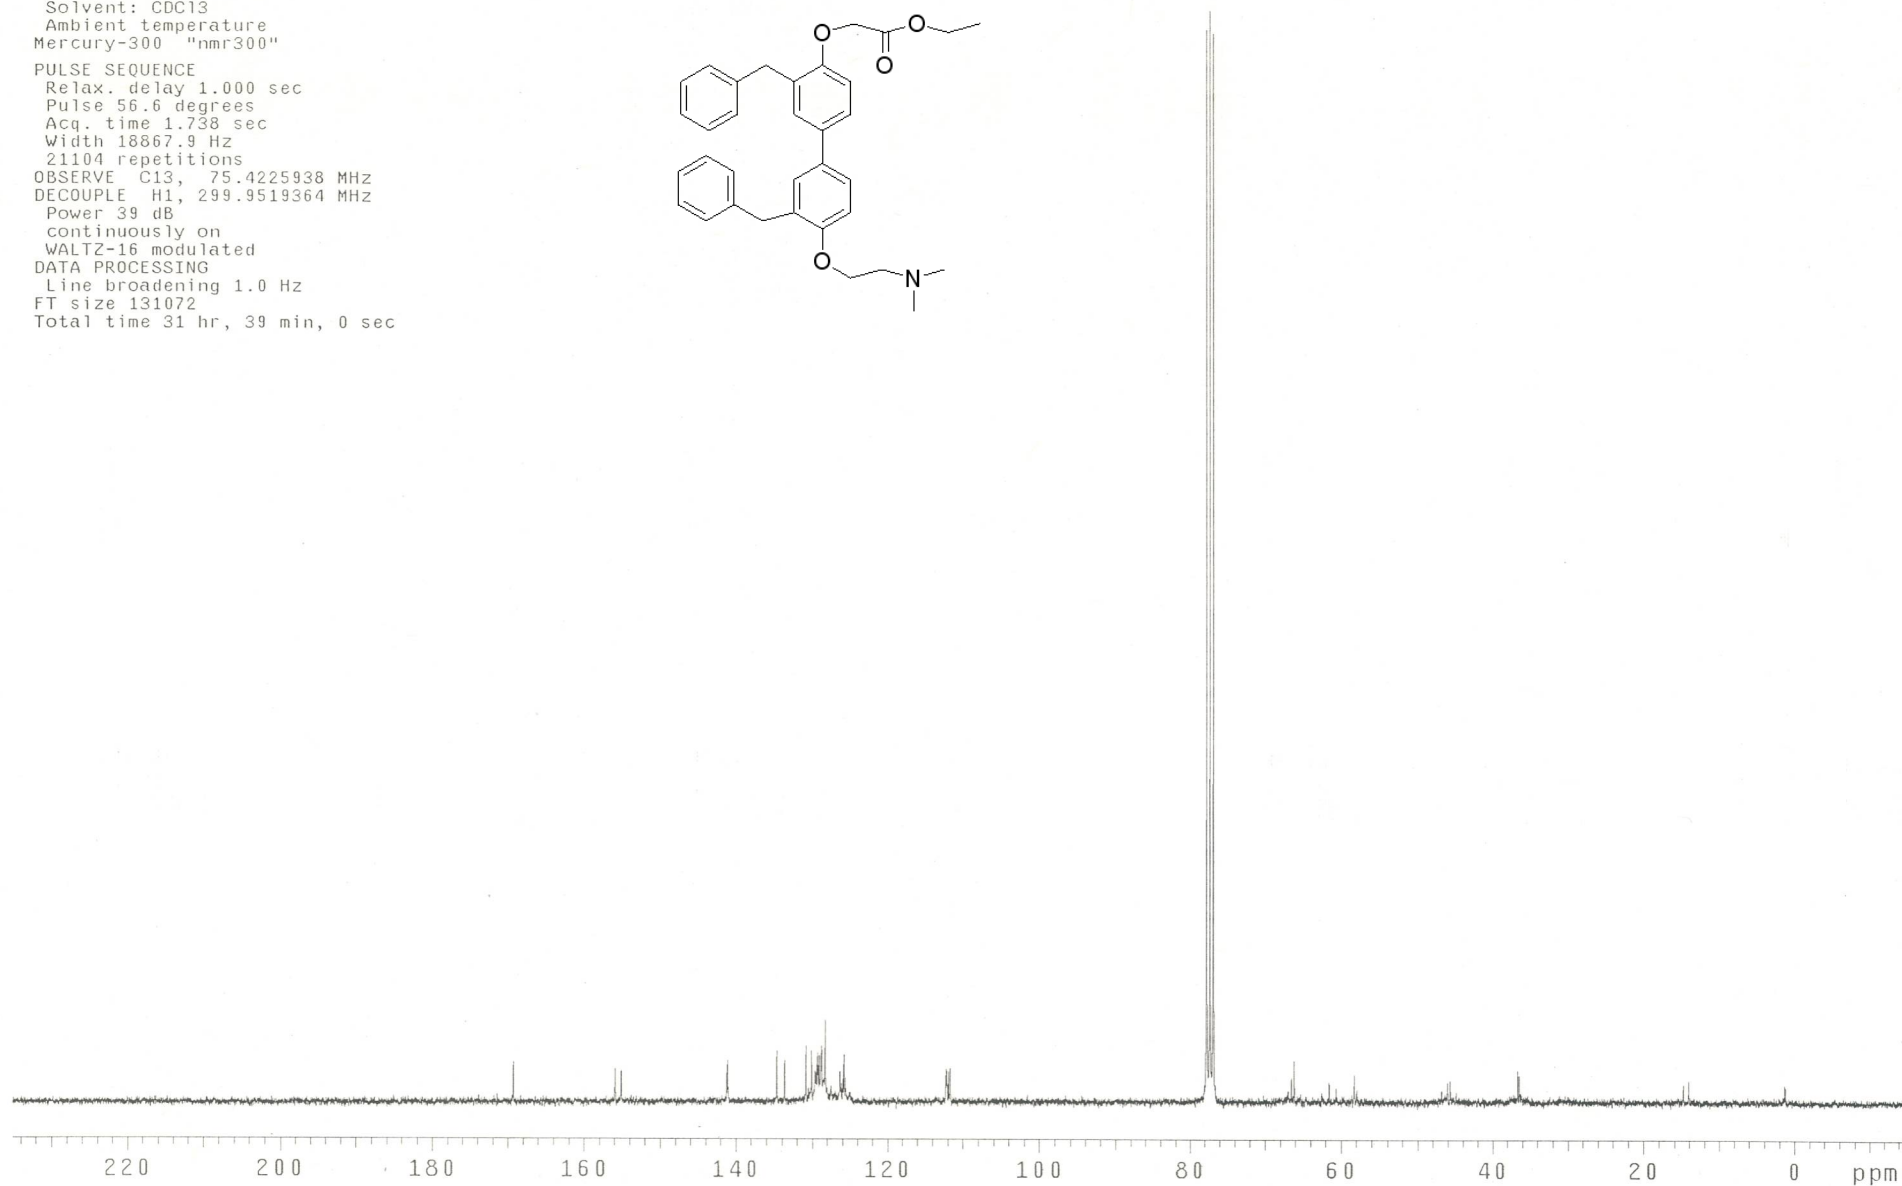

## Composition View

Edit

Help

Spectrum #1 \*1.00

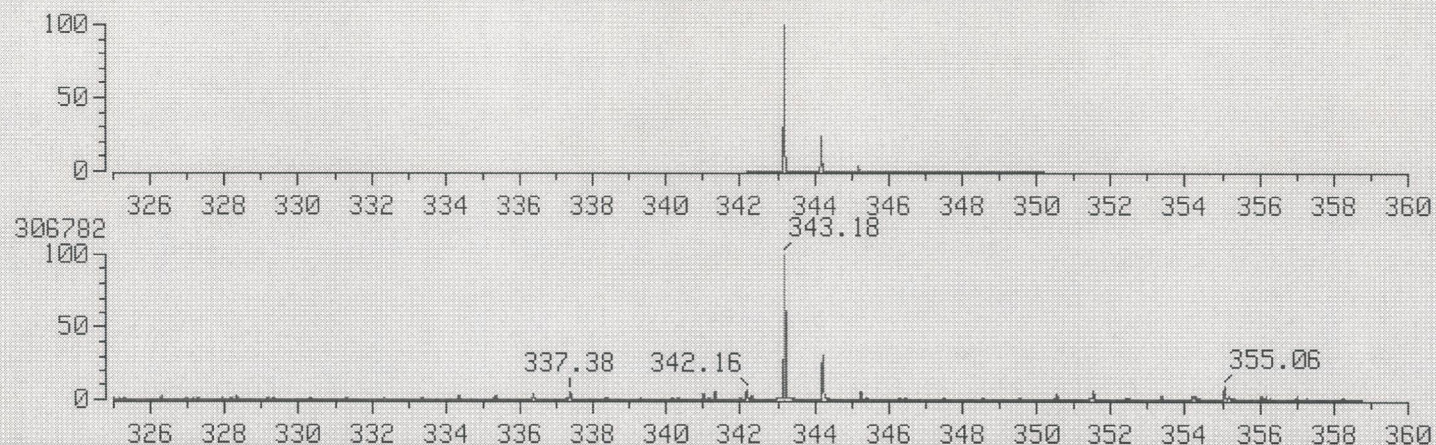

Max Error (mmu) ≡ 3

Max U.S. ≡ 20.0

Min Error (mmu) ≡ 3

Min U.S. ≡ -0.5

defect (ppm) ≡ 3

Frg-CHK  Off

STD Error (mmu) ≡ 3

STD-CHK  Off

| Element | Max. | Min. | Isotope |
|---------|------|------|---------|
| C       | 40   | 0    | 1       |
| H       | 50   | 0    | 1       |
| O       | 5    | 0    | 1       |
| N       | 2    | 0    | 1       |

Calculate

Filter

Cancel

Edit

Accept

Delete

Cancel

Format

Composition Formula 

Type in

Print

Elements : C 40/0, H 50/0, O 5/0, N 2/0

Mass Tolerance : 3mmu

Unsaturation : -0.5 ~ 20.0

No. m/z Int% Err-mmu U.S. Composition

1 343.1784 100.0 +0.0 9.0 C<sub>20</sub>H<sub>25</sub>O<sub>4</sub>N2 -2.7 13.5 C<sub>23</sub>H<sub>23</sub>O<sub>2</sub>N<sub>2</sub>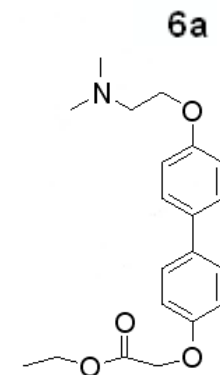

## Composition View

Edit

Help

Spectrum #1 \*0.79

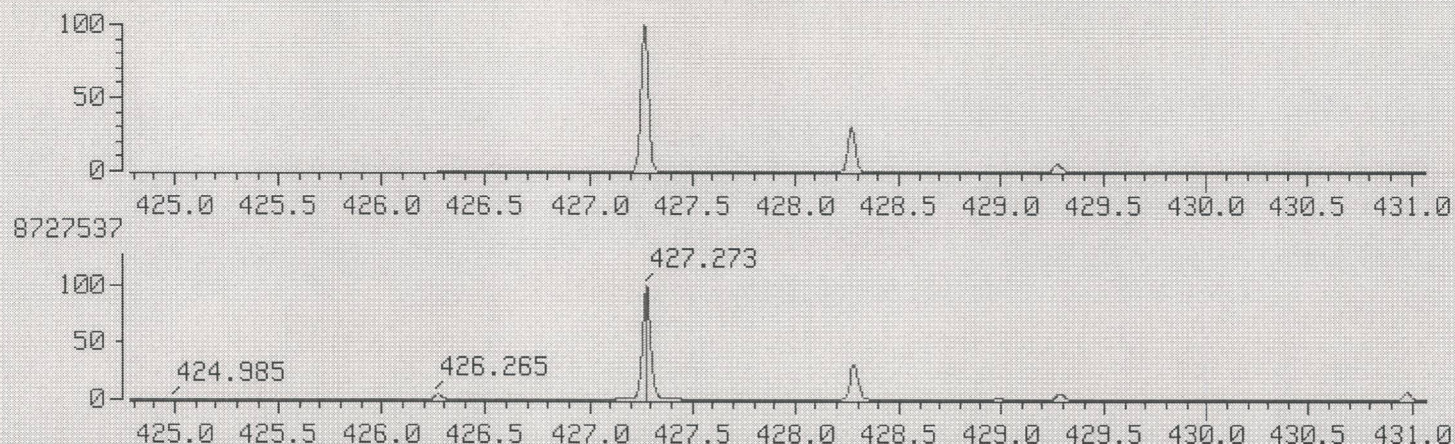

Max Error (mmu) ≡ 3

Max U.S. ≡ 20.0

Min Error (mmu) ≡ 3

Min U.S. ≡ -0.5

defect (ppm) ≡ 3

Frg-CHK  Off

STD Error (mmu) ≡ 3

STD-CHK  Off

| Element | Max. | Min. | Isotope |
|---------|------|------|---------|
| C       | 40   | 0    | 1       |
| H       | 50   | 0    | 1       |
| O       | 5    | 0    | 1       |
| N       | 2    | 0    | 1       |

Calculate

Filter

Cancel

Edit

Accept

Delete

Cancel

Format

Composition Formula 

Type in

Print

Elements : C 40/0, H 50/0, O 5/0, N 2/0

Mass Tolerance : 3mmu

Unsaturation : -0.5 ~ 20.0

No. m/z Int% Err-mmu U.S. Composition

1 427.2734 100.0 +1.2 9.0 C26H37O4N

2 -1.5 13.5 C29H35ON2

6b

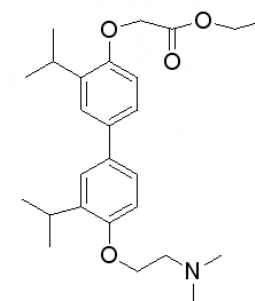

Composition View

Edit

Help

Spectrum #5 \*1.00

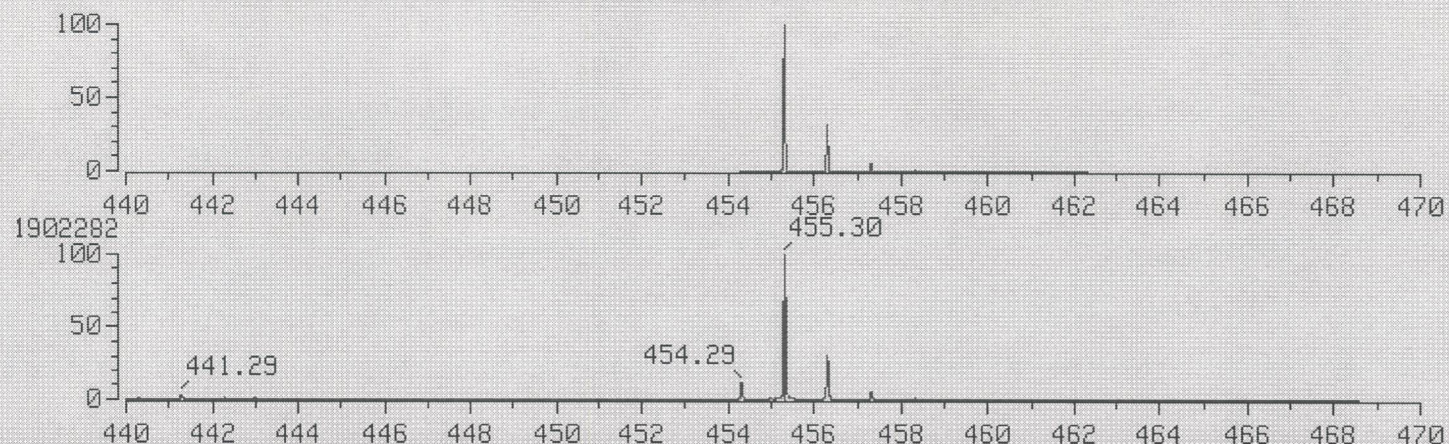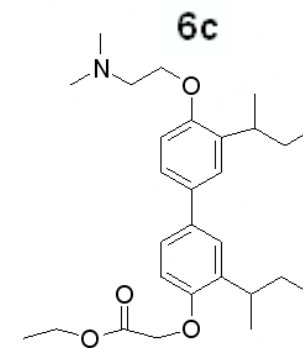

Max Error (mmu) ≡ 3

Max U.S. ≡ 20.0

Min Error (mmu) ≡ 3

Min U.S. ≡ -0.5

defect (ppm) ≡ 3

Fig-CHK  Off

STD Error (mmu) ≡ 3

STD-CHK  Off

| Element | Max. | Min. | Isotope |
|---------|------|------|---------|
| C       | 40   | 0    | 1       |
| H       | 50   | 0    | 1       |
| O       | 5    | 0    | 1       |
| N       | 2    | 0    | 1       |

Calculate

Filter

Cancel

Edit

Accept

Delete

Cancel

Format  Composition Formula

Type in

Print

Elements : C 40/0, H 50/0, O 5/0, N 2/0

Mass Tolerance : 3mmu

Unsaturation : -0.5 ~ 20.0

No. m/z Int% Err-mmu U.S. Composition

|   |          |       |      |     |                                                  |
|---|----------|-------|------|-----|--------------------------------------------------|
| 1 | 455.3028 | 100.0 | -0.8 | 9.0 | C <sub>28</sub> H <sub>41</sub> O <sub>4</sub> N |
|---|----------|-------|------|-----|--------------------------------------------------|

Composition View

Edit

Help

Spectrum #2 \*0.79

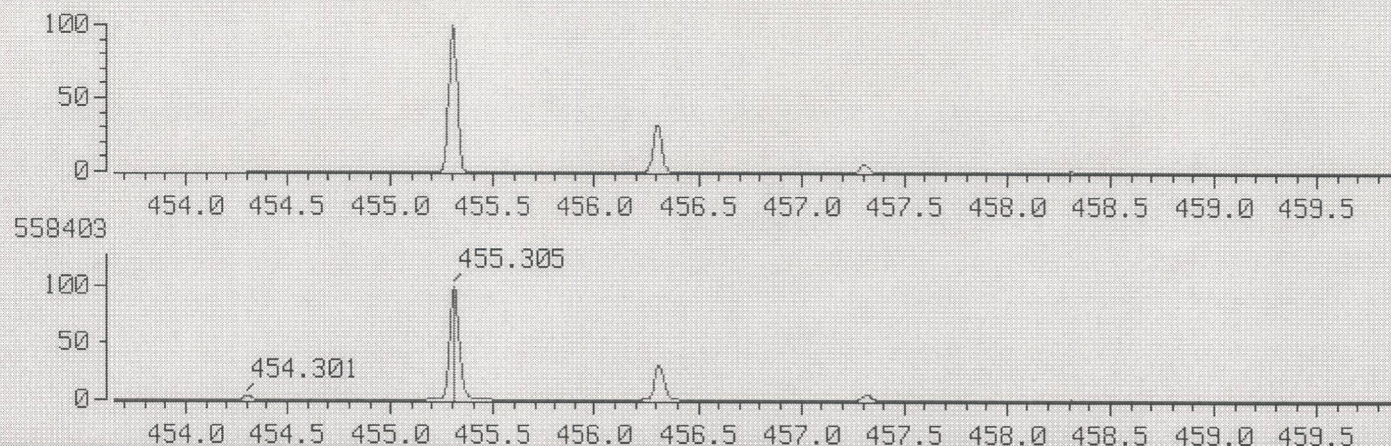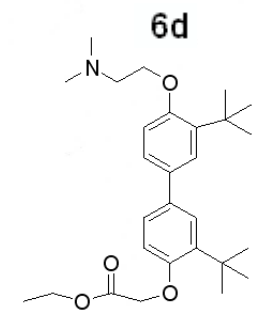

Max Error (mmu) ≡ 3      Max U.S. ≡ 20.0  
 Min Error (mmu) ≡ 3      Min U.S. ≡ -0.5  
 defect (ppm) ≡ 3      Frq-CHK  Off  
 STD Error (mmu) ≡ 3      STD-CHK  Off

| Element | Max. | Min. | Isotope |
|---------|------|------|---------|
| C       | 40   | 0    | 1       |
| H       | 50   | 0    | 1       |
| O       | 5    | 0    | 1       |
| N       | 2    | 0    | 1       |

Calculate      Filter      Cancel      Edit      Accept      Delete      Cancel

Format      Composition Formula      Type in      Print

Elements : C 40/0, H 50/0, O 5/0, N 2/0  
 Mass Tolerance : 3mmu  
 Unsaturation : -0.5 ~ 20.0

| No. | m/z      | Int%  | Err-mmu | U.S. | Composition                                                   |
|-----|----------|-------|---------|------|---------------------------------------------------------------|
| 1   | 455.3054 | 100.0 | +1.8    | 9.0  | C <sub>28</sub> H <sub>41</sub> O <sub>4</sub> N              |
| 2   |          |       | -0.8    | 13.5 | C <sub>31</sub> H <sub>39</sub> O <sub>4</sub> N <sub>2</sub> |

## Composition View

Edit

Help

Spectrum #3 \*1.00

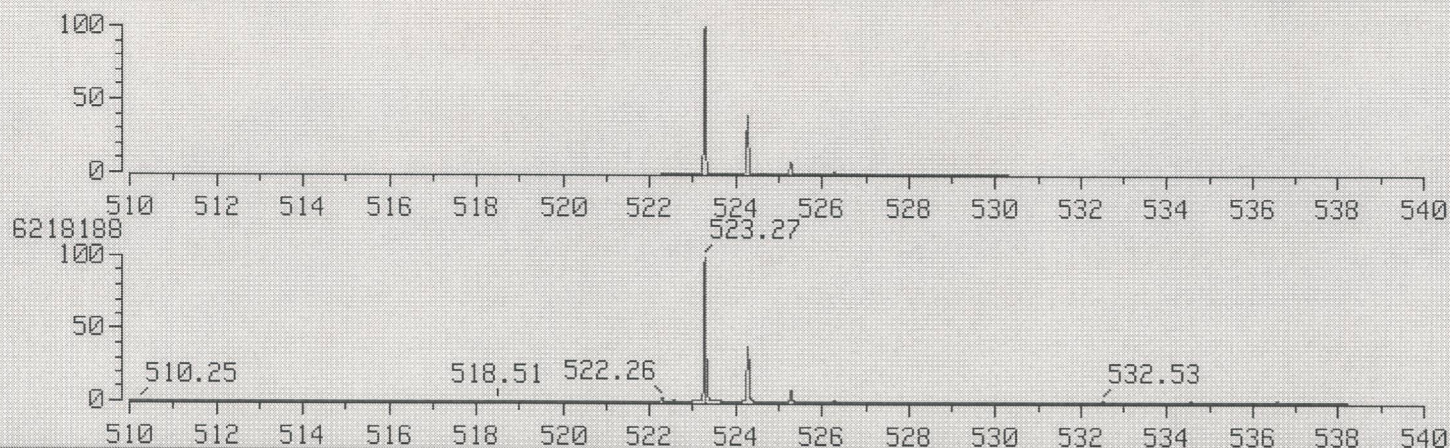

Max Error (mmu) ≡ 3

Max U.S. ≡ 20.0

Min Error (mmu) ≡ 3

Min U.S. ≡ -0.5

defect (ppm) ≡ 3

Frg-CHK  Off

STD Error (mmu) ≡ 3

STD-CHK  Off

| Element | Max. | Min. | Isotope |
|---------|------|------|---------|
| C       | 40   | 0    | 1       |
| H       | 50   | 0    | 1       |
| O       | 5    | 0    | 1       |
| N       | 2    | 0    | 1       |

Calculate

Filter

Cancel

Edit

Accept

Delete

Cancel

Format

Composition Formula 

Type in

Print

Elements : C 40/0, H 50/0, O 5/0, N 2/0

Mass Tolerance : 3mmu

Unsaturation : -0.5 ~ 20.0

No. m/z Int% Err-mmu U.S. Composition

|   |          |       |      |      |           |
|---|----------|-------|------|------|-----------|
| 1 | 523.2736 | 100.0 | +1.4 | 17.0 | C34H37O4N |
|---|----------|-------|------|------|-----------|

6e

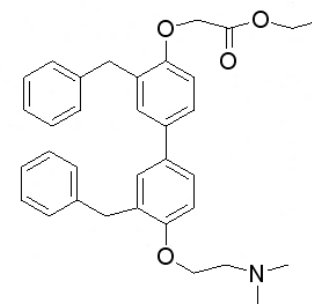

Supplement: NIHMS159002-supplement-1_si_001.pdf [file NIHMS159002-supplement-1_si_001.pdf]
